# Supplementary material for: Catalyst-free assembly of a polyfunctionalized 1,2,4-triazole-fused N-heterocycle, 6-acylated pyrrolo[1,2-a][1,2,4]triazolo[5,1-c]pyrazine
Source: Royal Society of Chemistry journal article supplement (doi:10.1039/d3ob01747h), 2023-11-29
Supplement: d3ob01747h1.pdf [file d3ob01747h1.pdf]

## Electronic Supplementary Information

### **Catalyst-Free Assembly of Poly-Functionalized 1,2,4-Triazole-Fused *N*-Heterocycle, 6-Acylated Pyrrolo[1,2-*a*][1,2,4]triazolo[5,1-*c*]pyrazine**

Hyunjin Oh and Ikyon Kim\*

College of Pharmacy and Yonsei Institute of Pharmaceutical Sciences, Yonsei University  
85 Songdogwahak-ro, Yeonsu-gu, Incheon, 21983, Republic of Korea

\* Corresponding author. Tel.: +82 32 749 4515; fax: +82 32 749 4105; e-mail:  
[ikyonkim@yonsei.ac.kr](mailto:ikyonkim@yonsei.ac.kr)

## **Table of Contents**

|                                                                     |               |
|---------------------------------------------------------------------|---------------|
| Copies of $^1\text{H}$ and $^{13}\text{C}$ NMR spectra of <b>3</b>  | <b>S3-33</b>  |
| Copies of $^1\text{H}$ and $^{13}\text{C}$ NMR spectra of <b>4</b>  | <b>S34-45</b> |
| Copies of $^1\text{H}$ and $^{13}\text{C}$ NMR spectra of <b>6</b>  | <b>S46</b>    |
| Copies of $^1\text{H}$ and $^{13}\text{C}$ NMR spectra of <b>7</b>  | <b>S47</b>    |
| Copies of $^1\text{H}$ and $^{13}\text{C}$ NMR spectra of <b>9</b>  | <b>S48</b>    |
| Copies of $^1\text{H}$ and $^{13}\text{C}$ NMR spectra of <b>10</b> | <b>S49</b>    |
| Copies of $^1\text{H}$ and $^{13}\text{C}$ NMR spectra of <b>11</b> | <b>S50</b>    |
| Copies of $^1\text{H}$ and $^{13}\text{C}$ NMR spectra of <b>13</b> | <b>S51</b>    |
| Copies of $^1\text{H}$ and $^{13}\text{C}$ NMR spectra of <b>15</b> | <b>S52</b>    |
| Copies of $^1\text{H}$ and $^{13}\text{C}$ NMR spectra of <b>16</b> | <b>S53</b>    |
| Copies of $^1\text{H}$ and $^{13}\text{C}$ NMR spectra of <b>17</b> | <b>S54</b>    |
| Copies of $^1\text{H}$ and $^{13}\text{C}$ NMR spectra of <b>18</b> | <b>S55</b>    |
| Copies of $^1\text{H}$ and $^{13}\text{C}$ NMR spectra of <b>19</b> | <b>S56</b>    |
| Crystal structure data of <b>3q</b>                                 | <b>S57-58</b> |

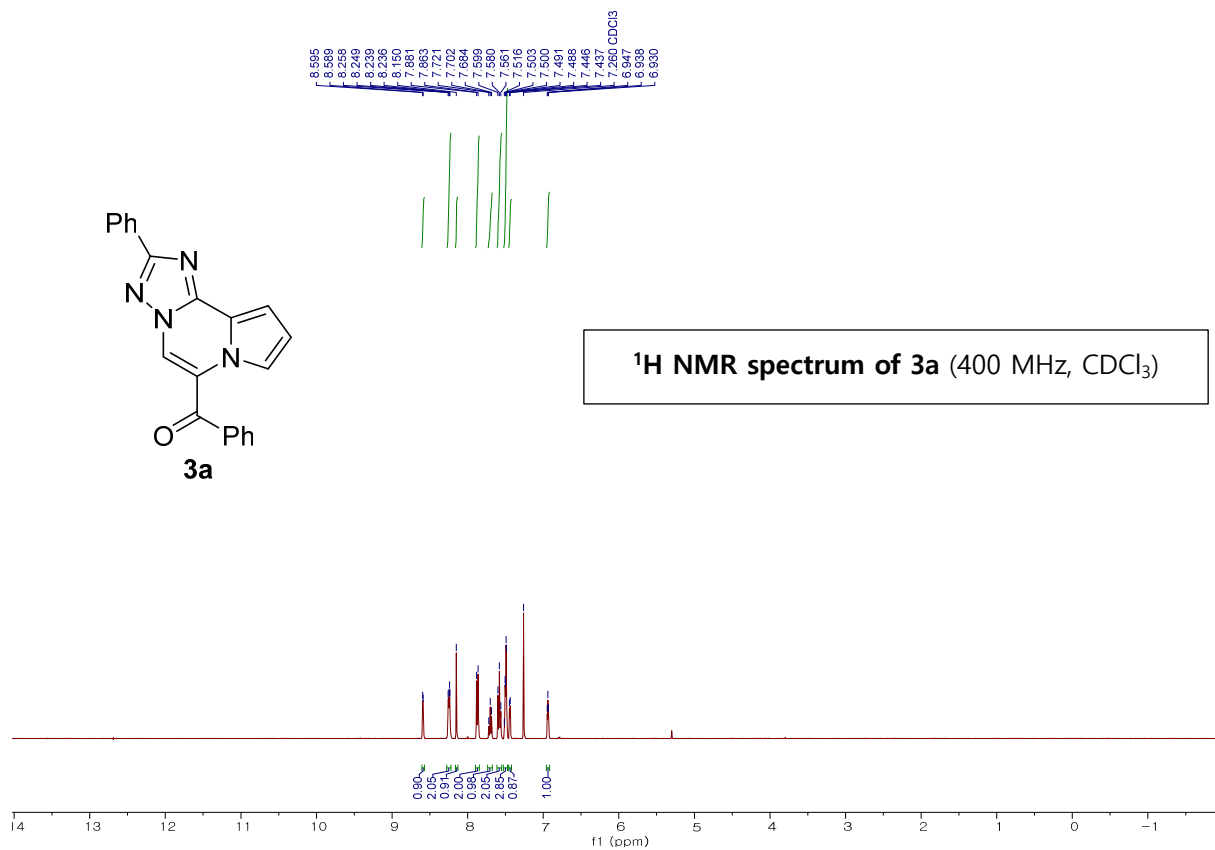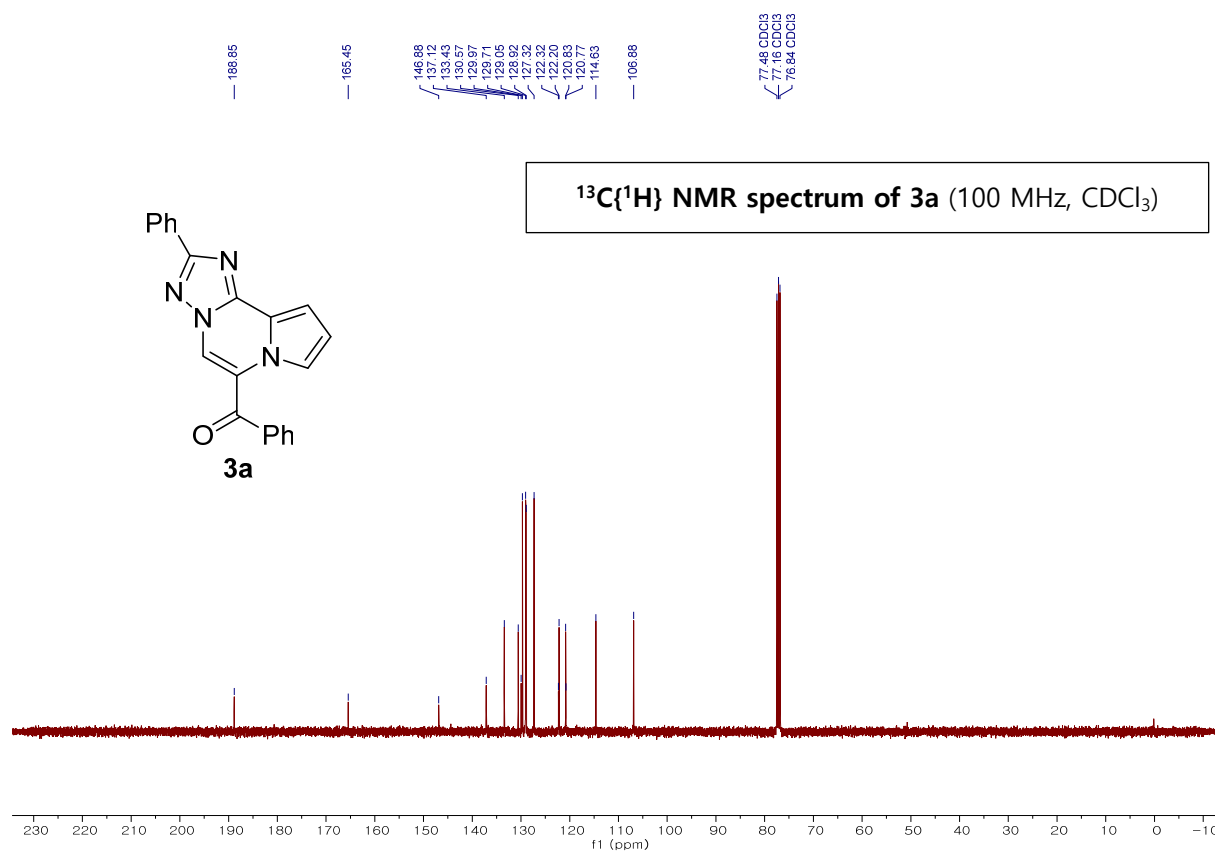

HSQC-2D-NMR spectrum of 3a (400 MHz, CDCl<sub>3</sub>)

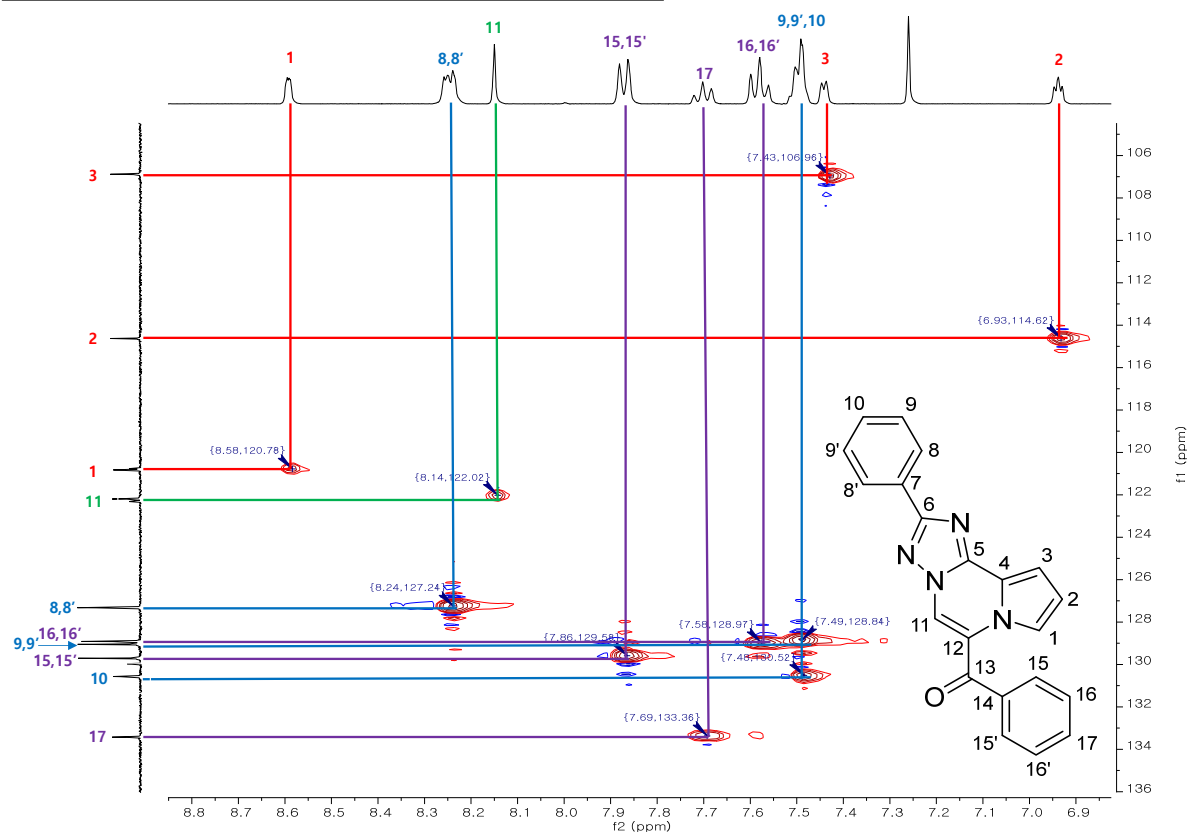

HMBC-2D-NMR spectrum of 3a (600 MHz, CDCl<sub>3</sub>)

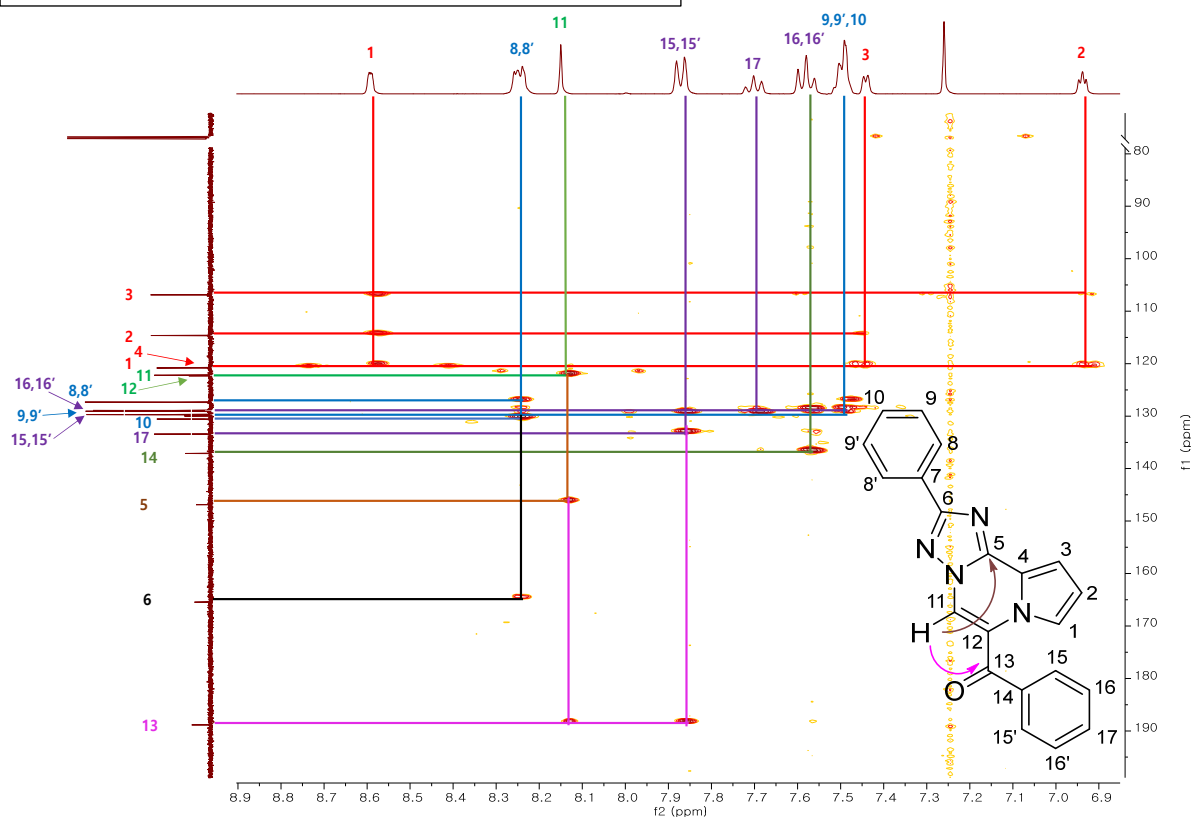

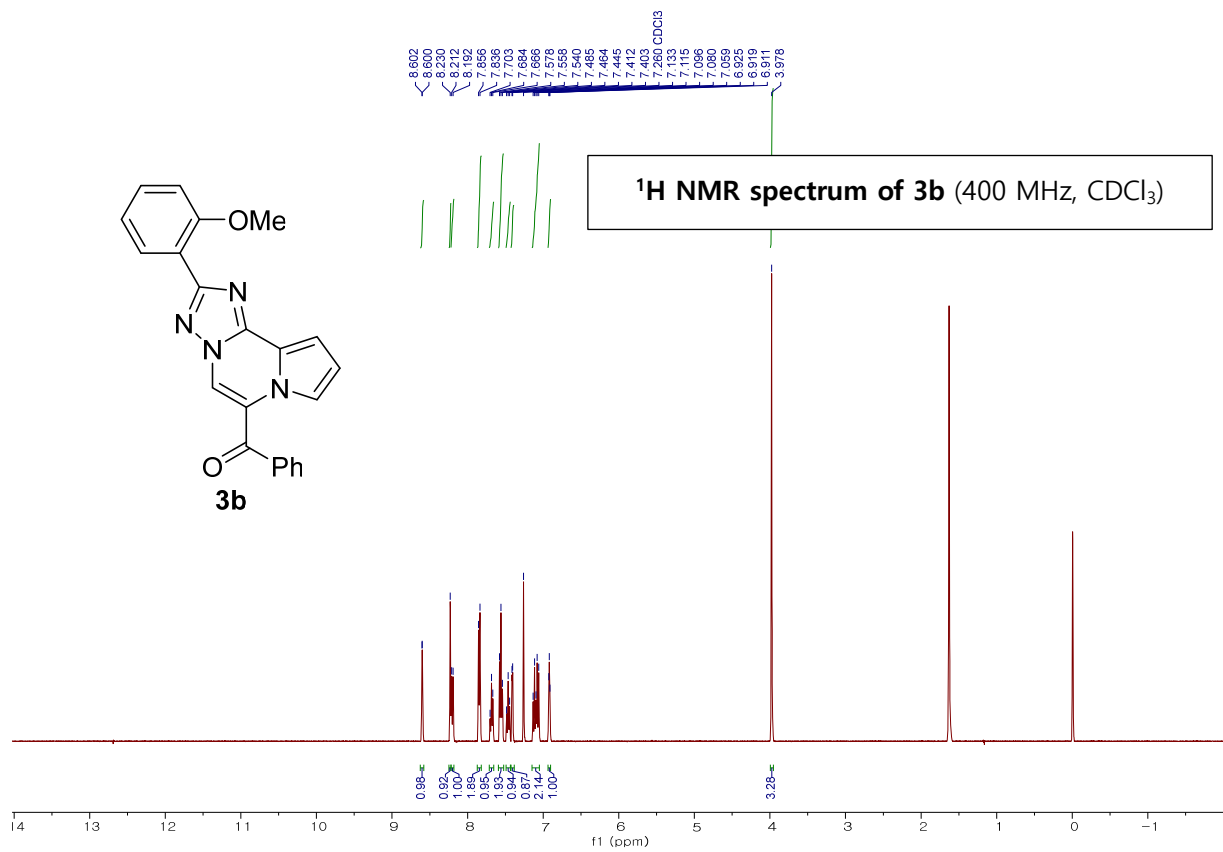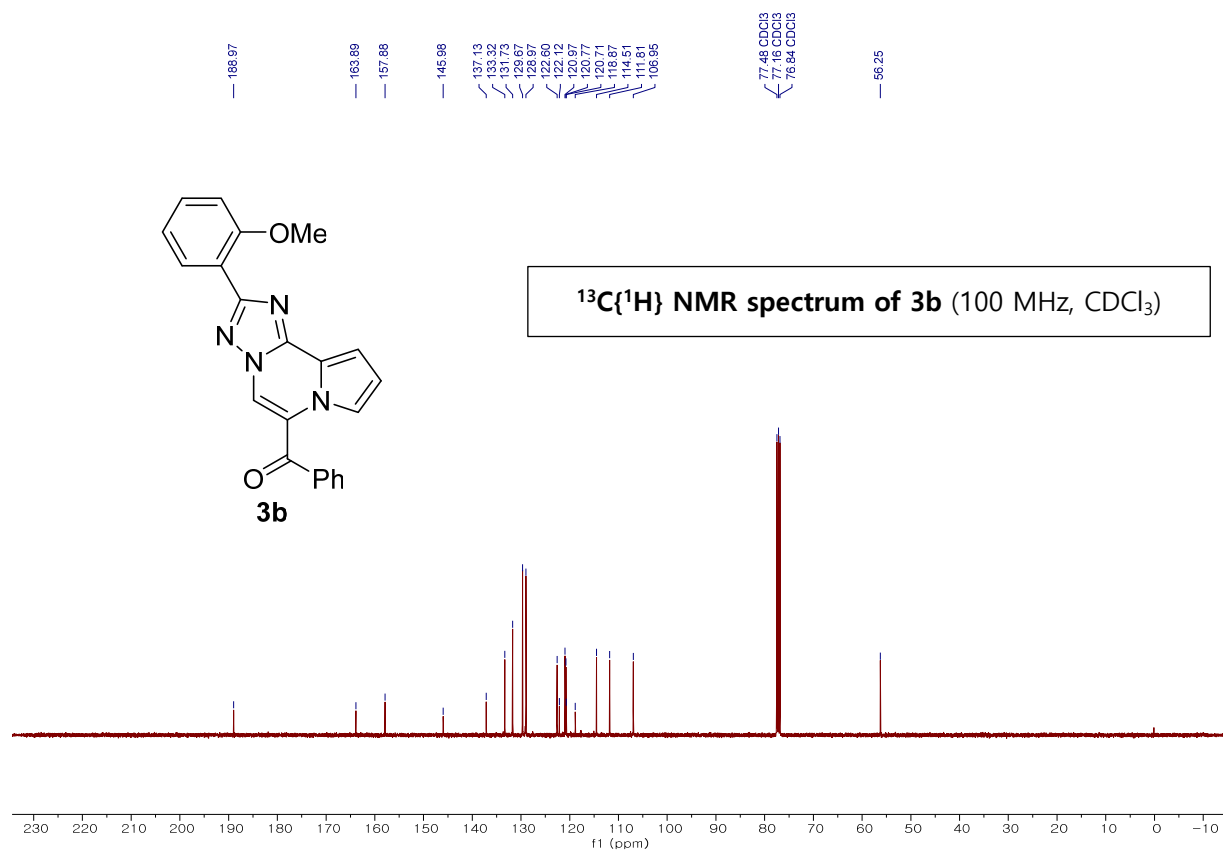

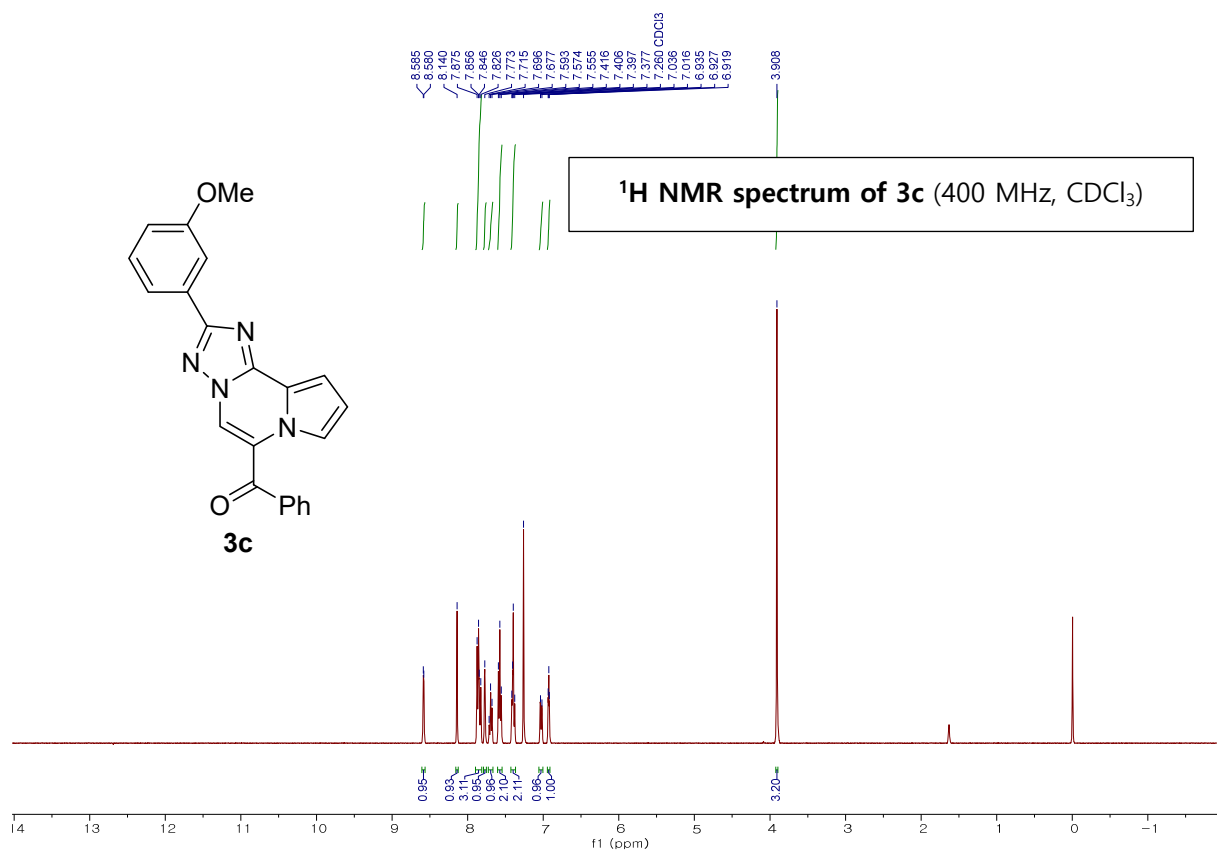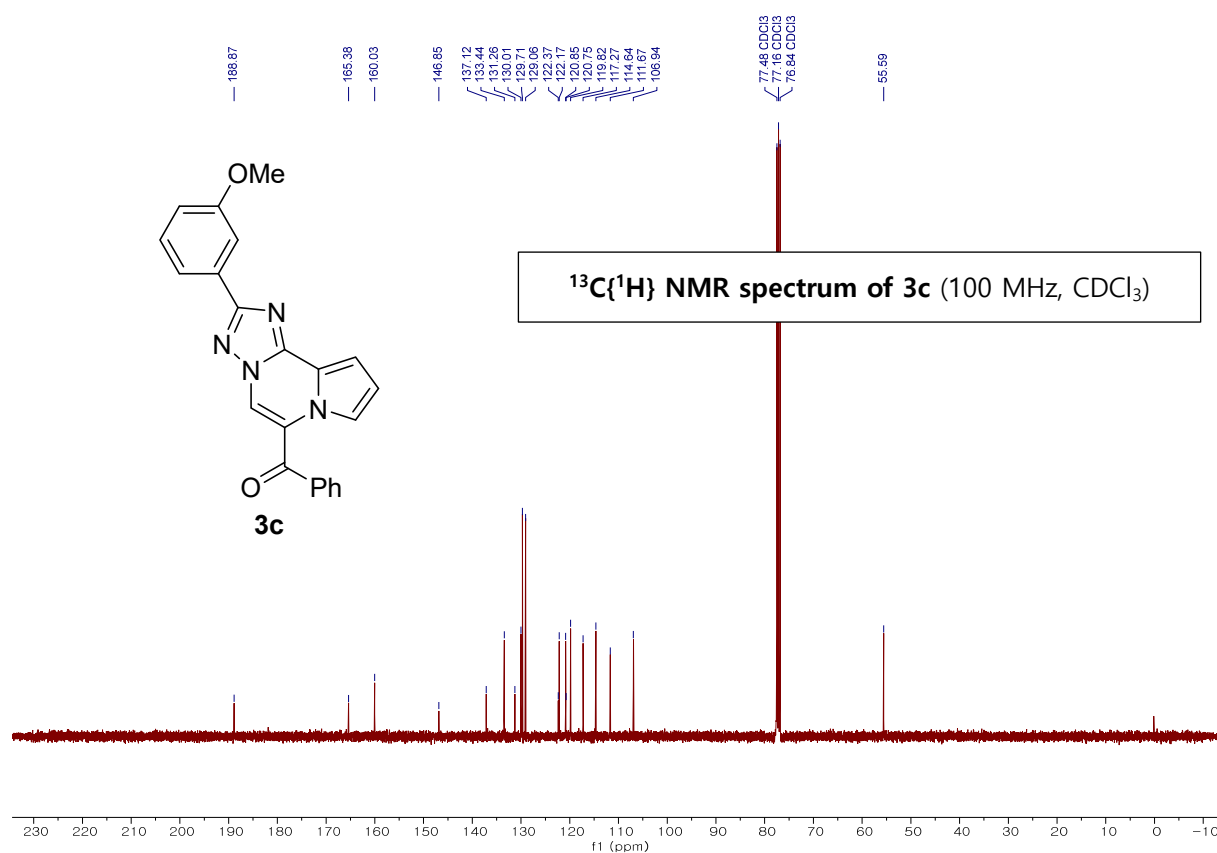

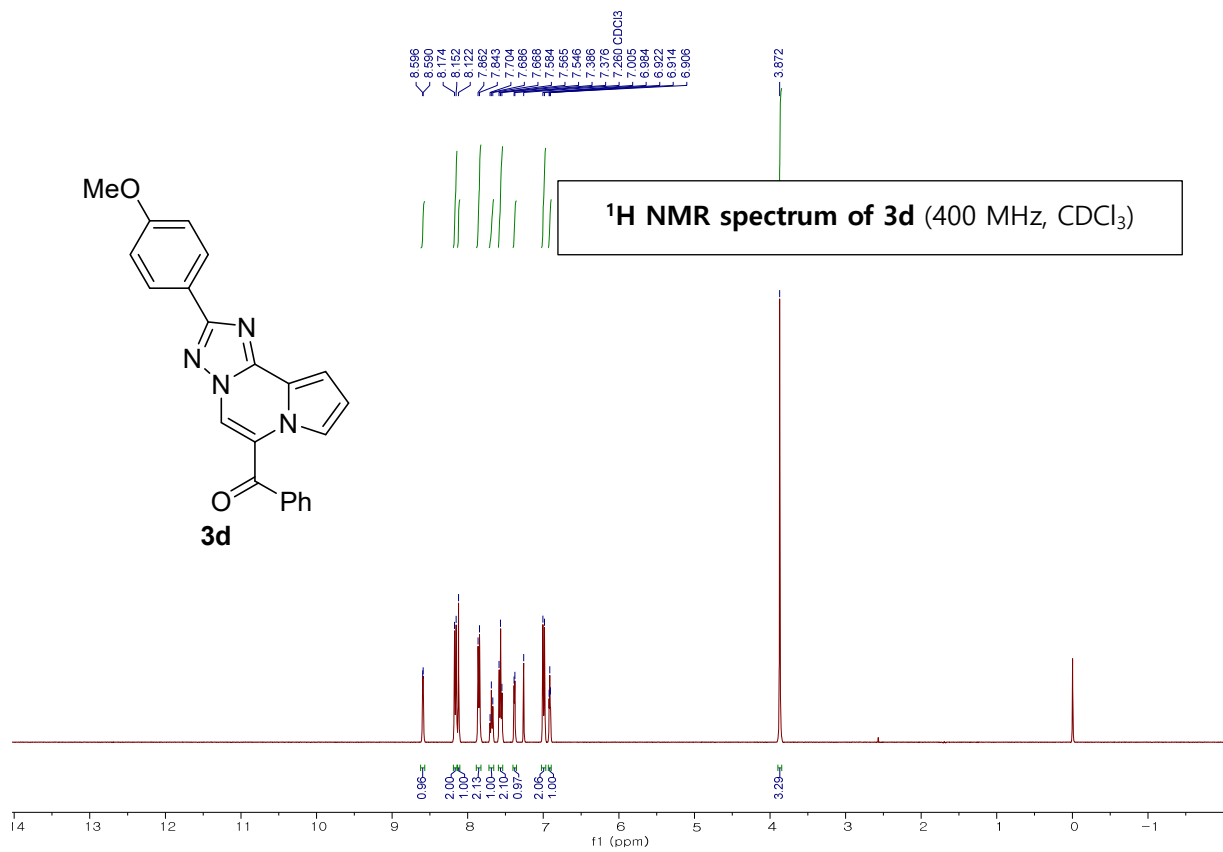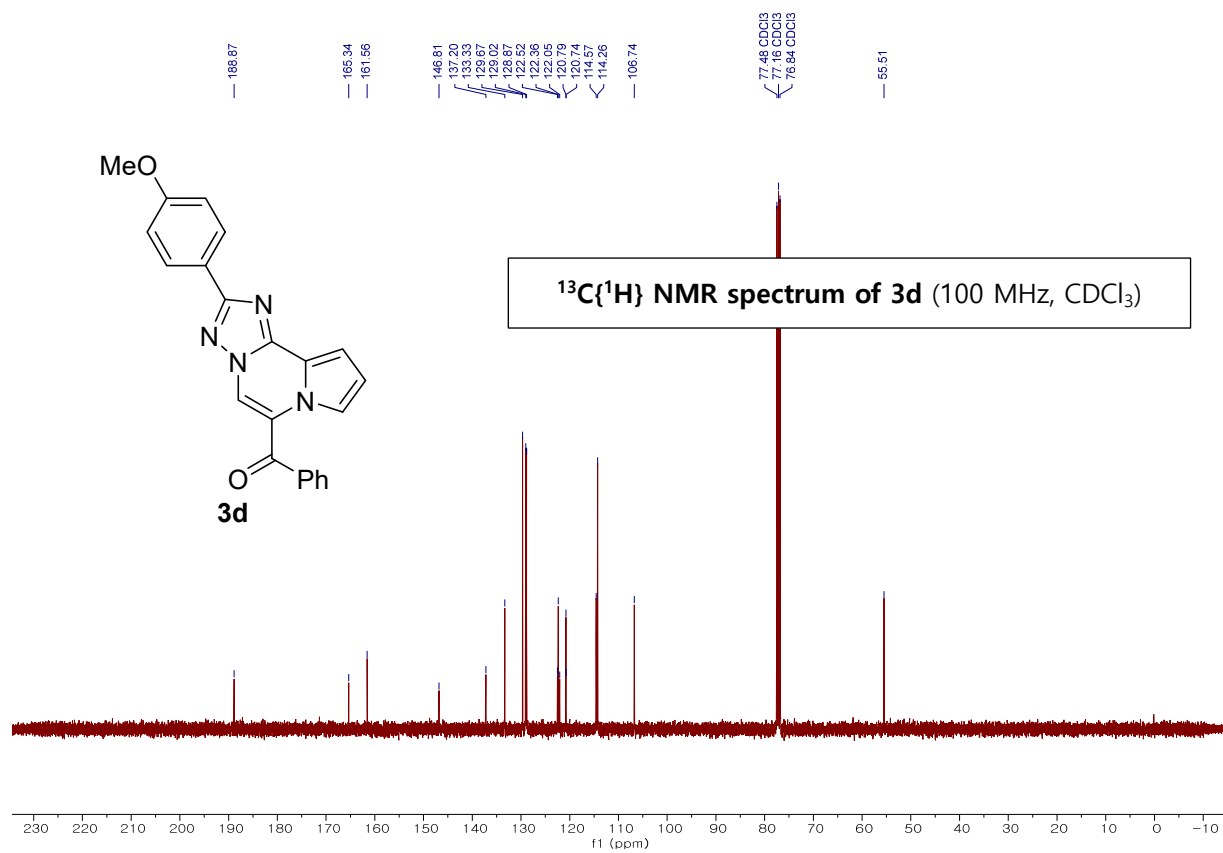

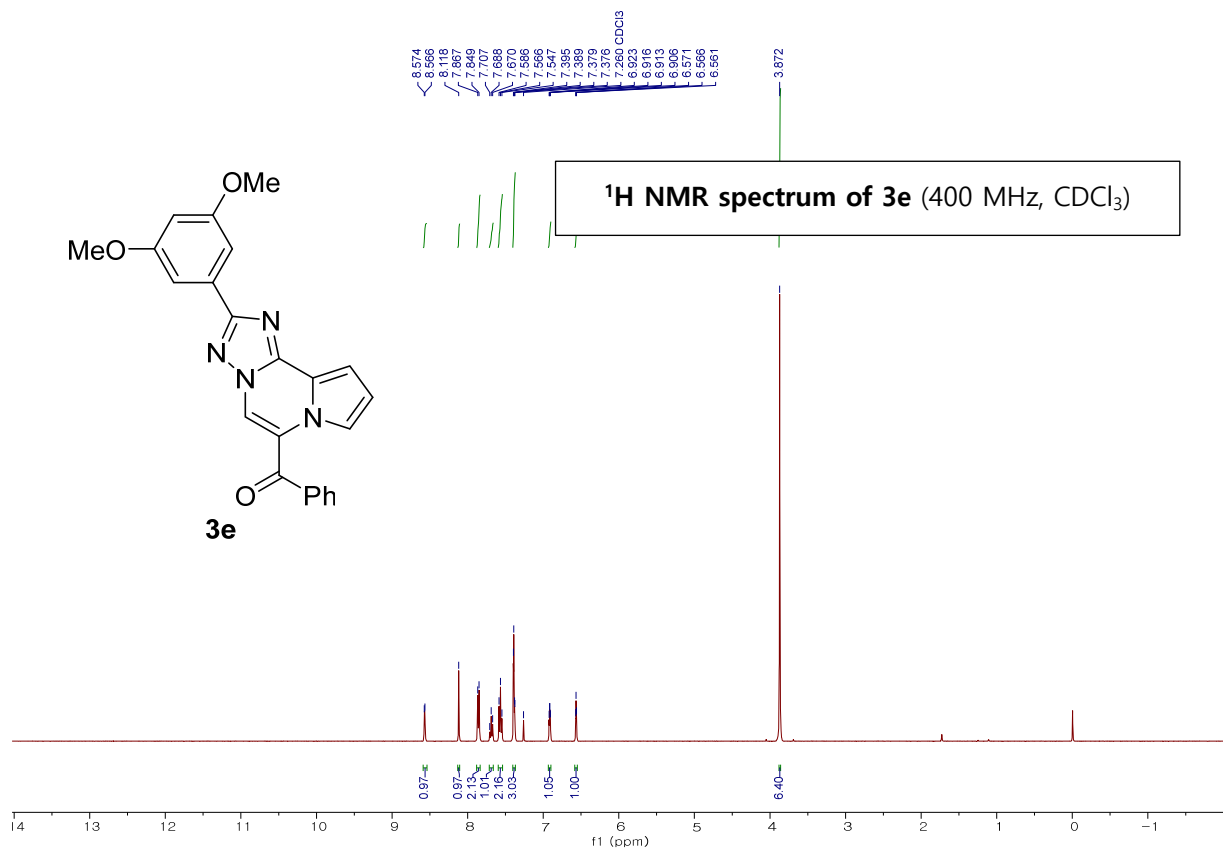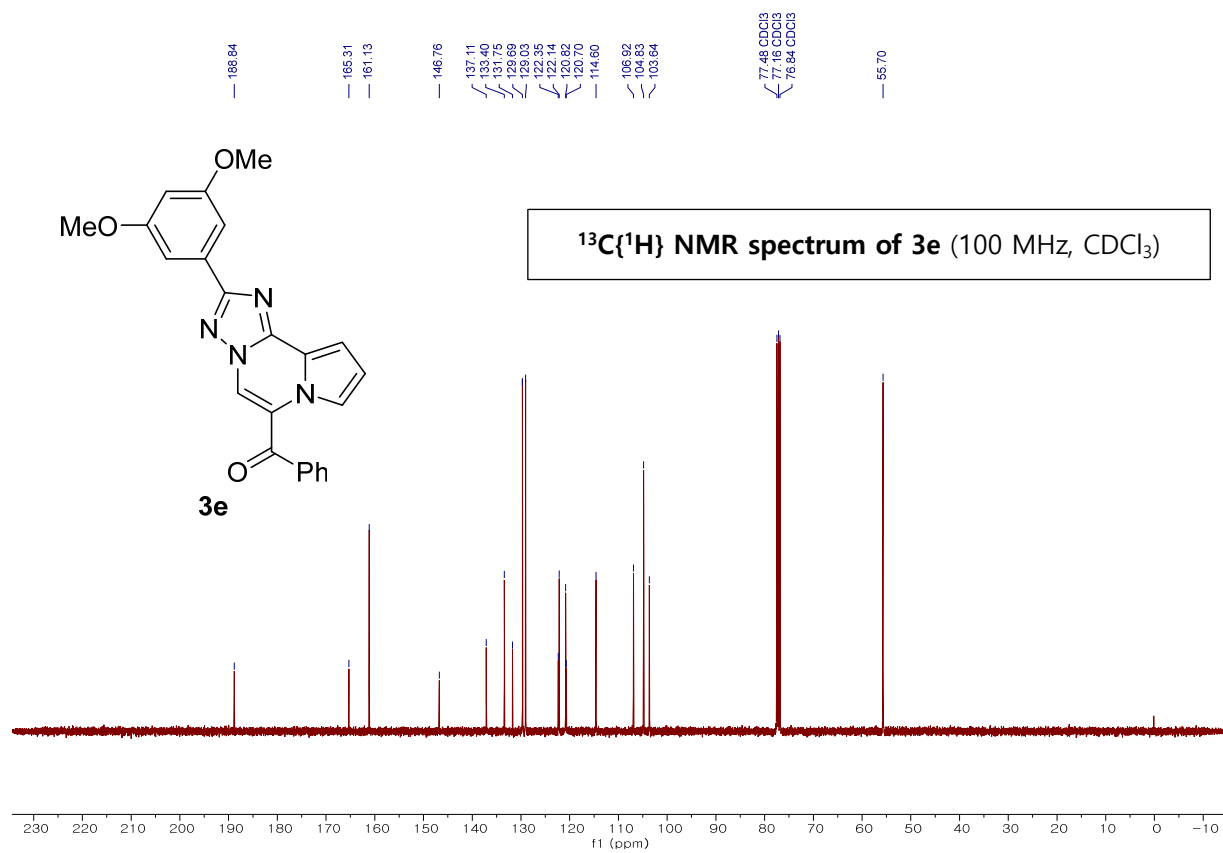



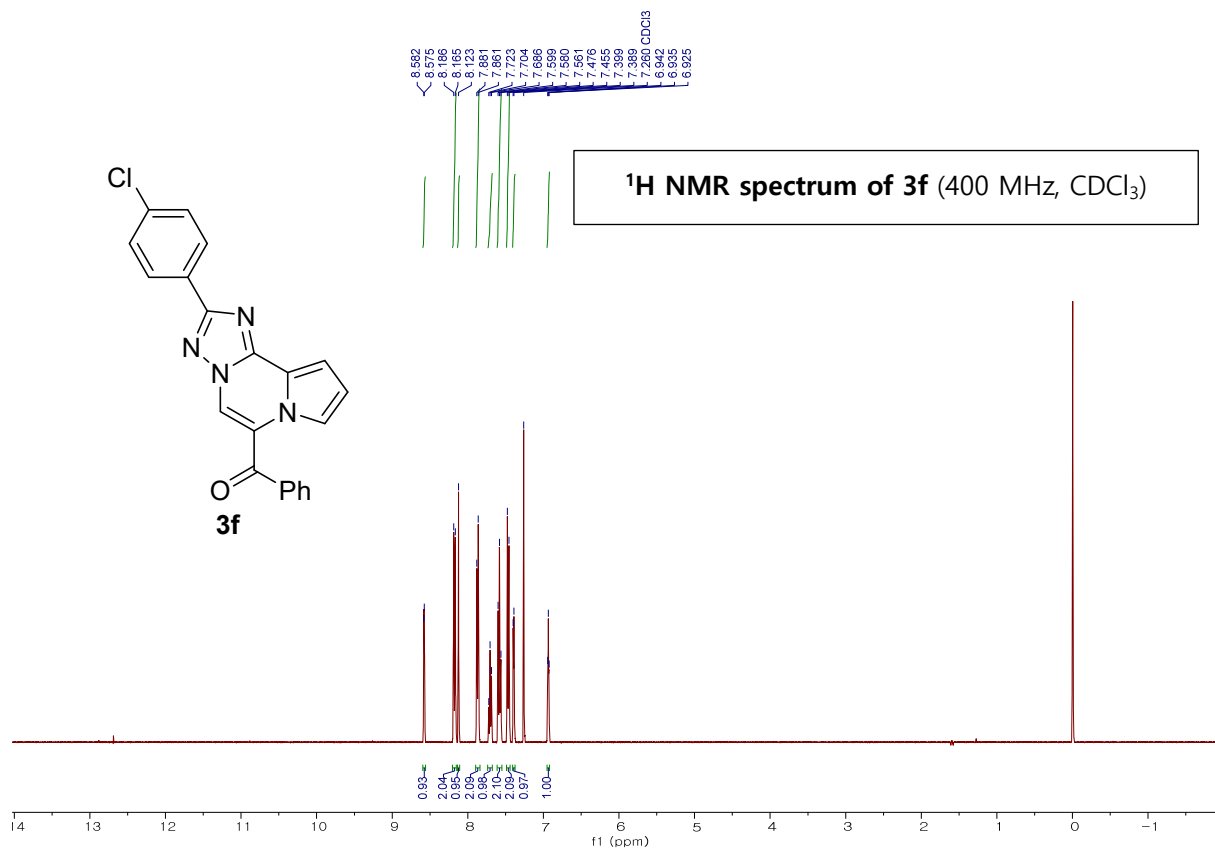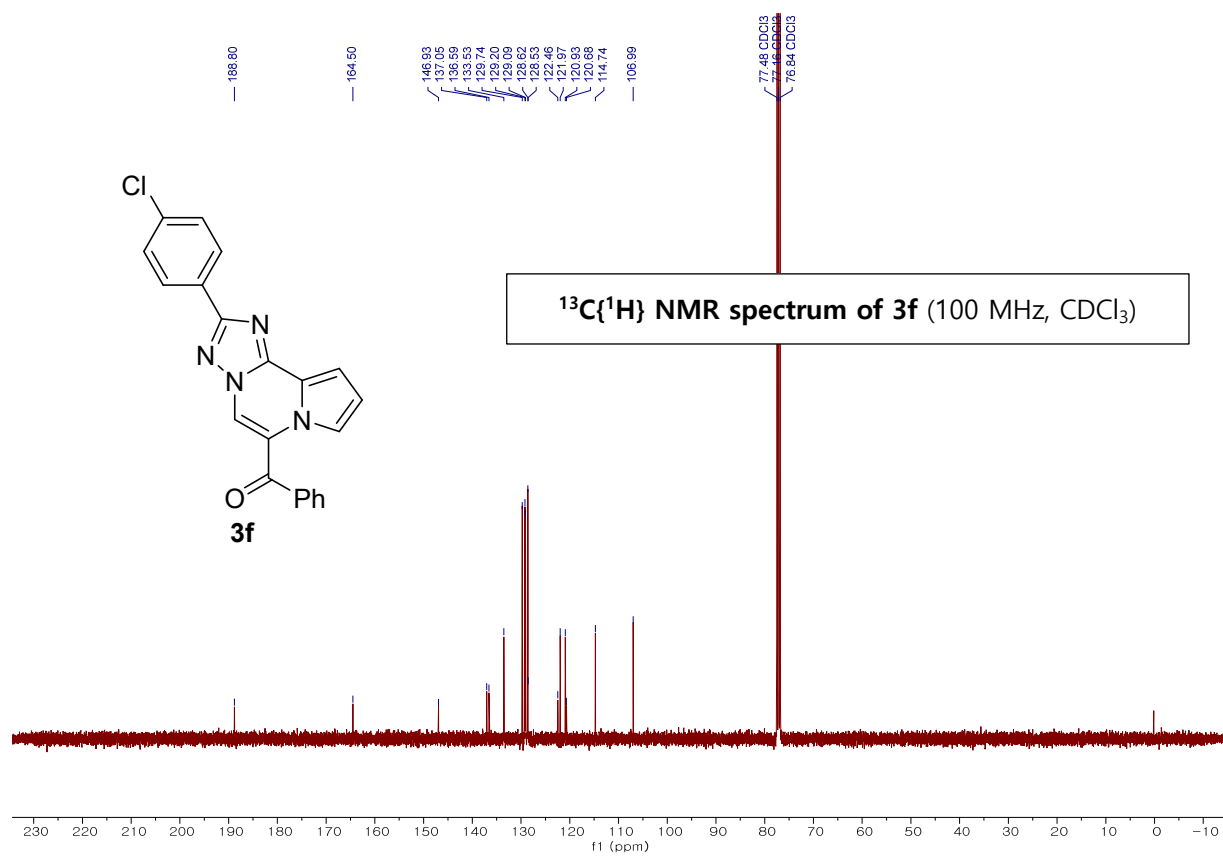

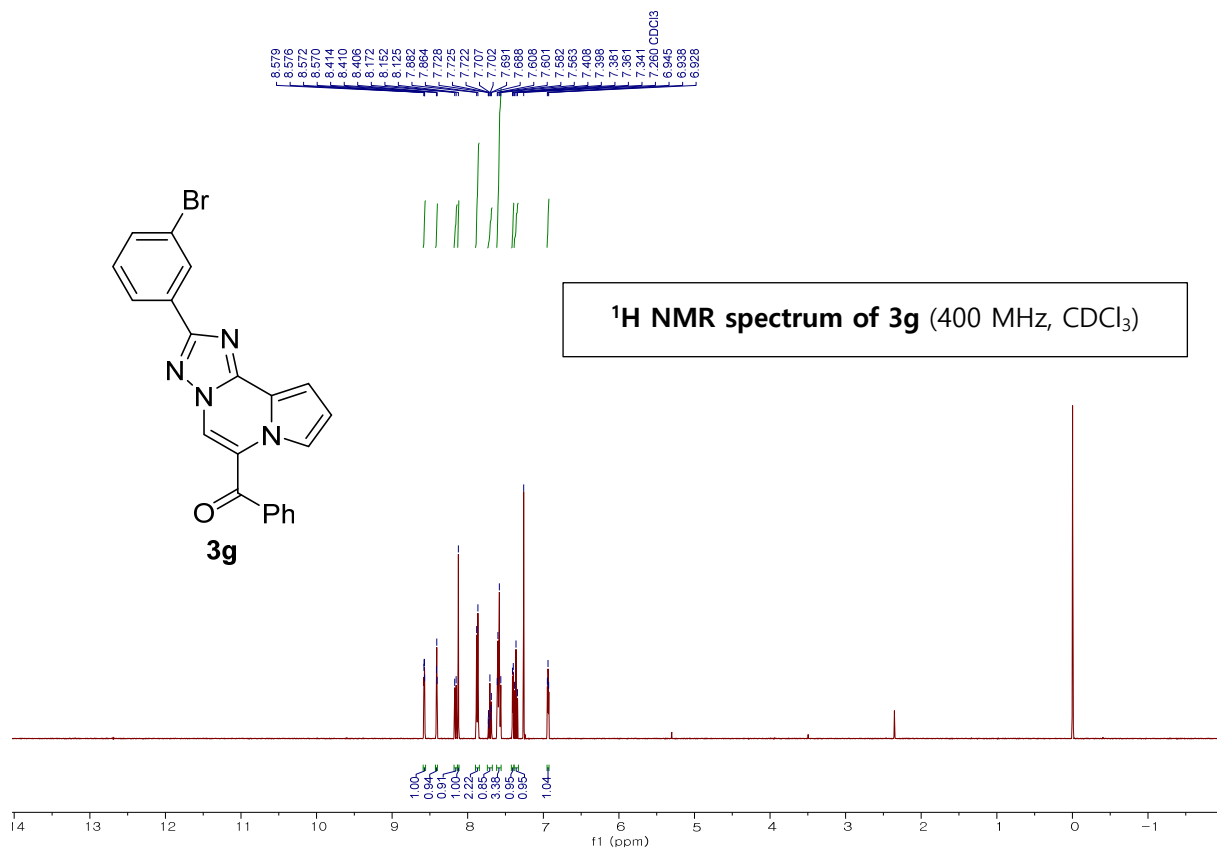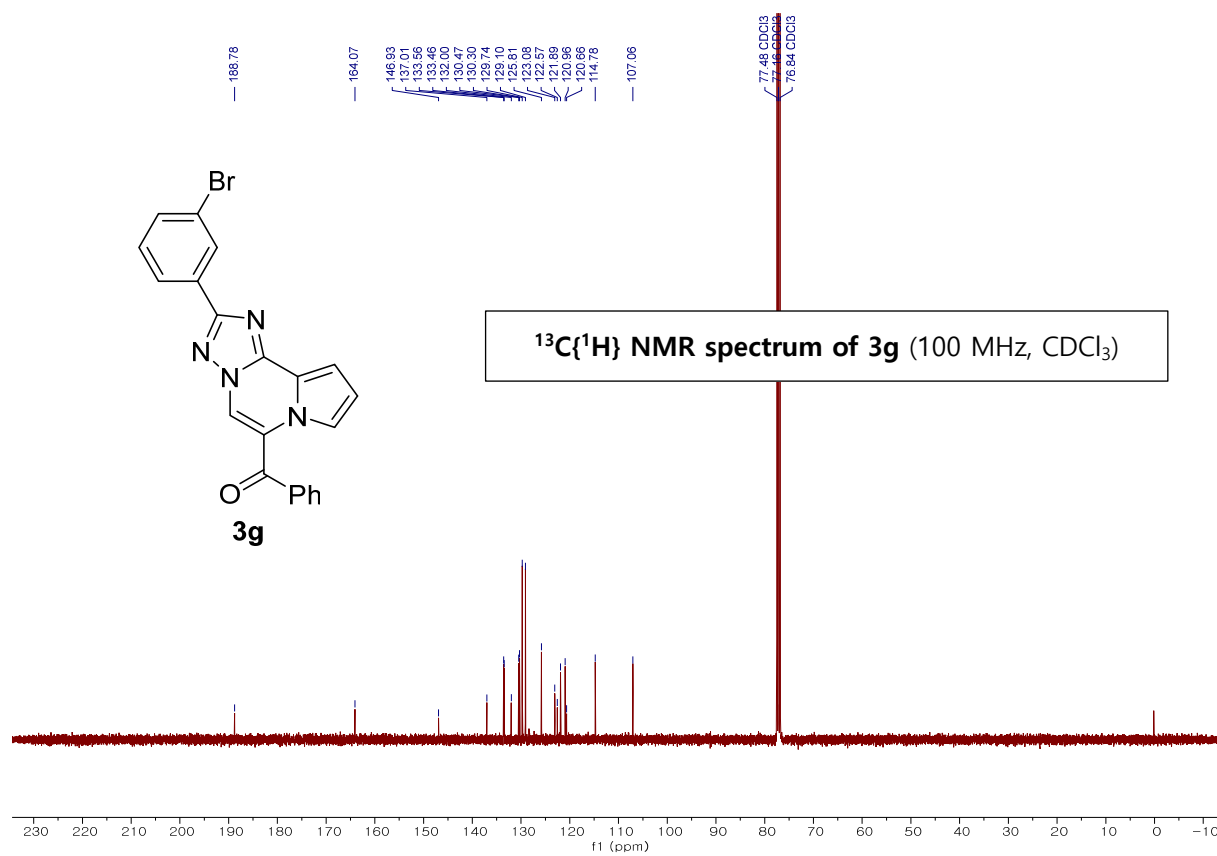

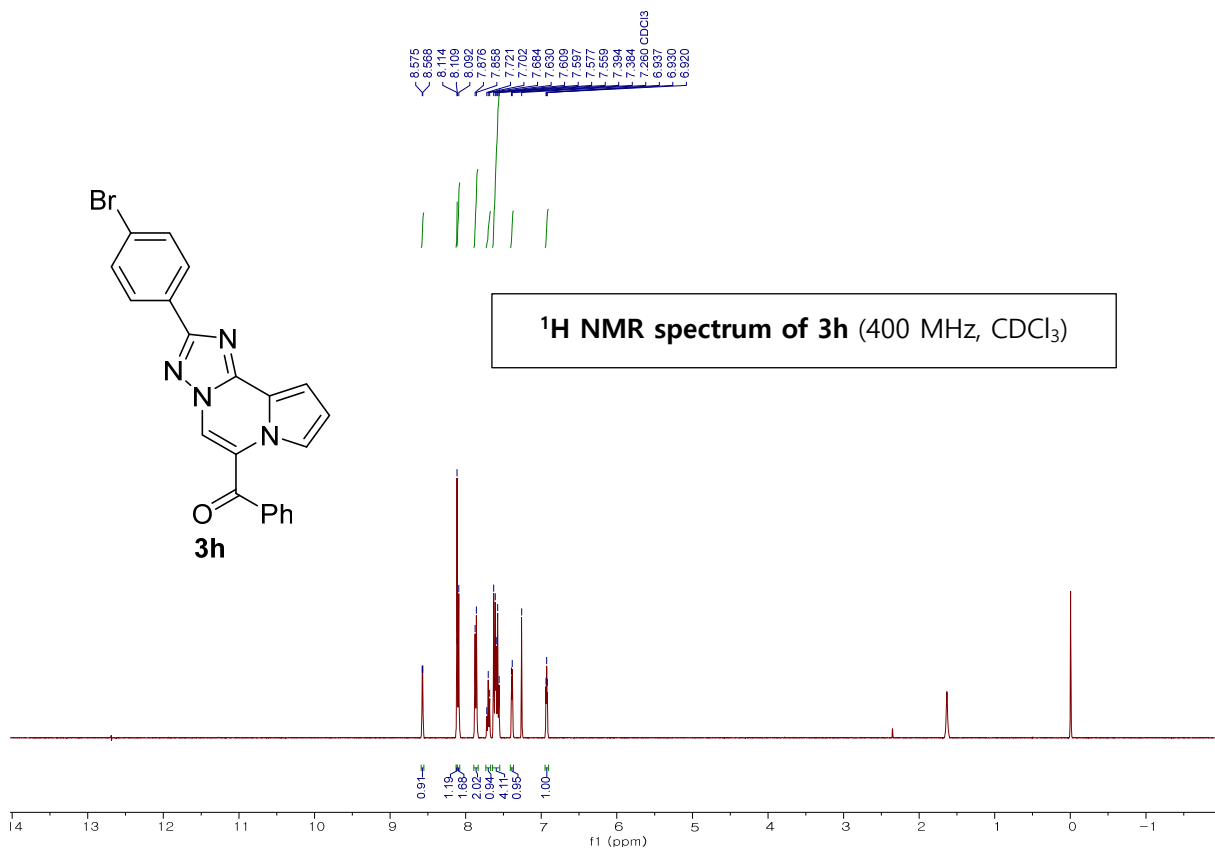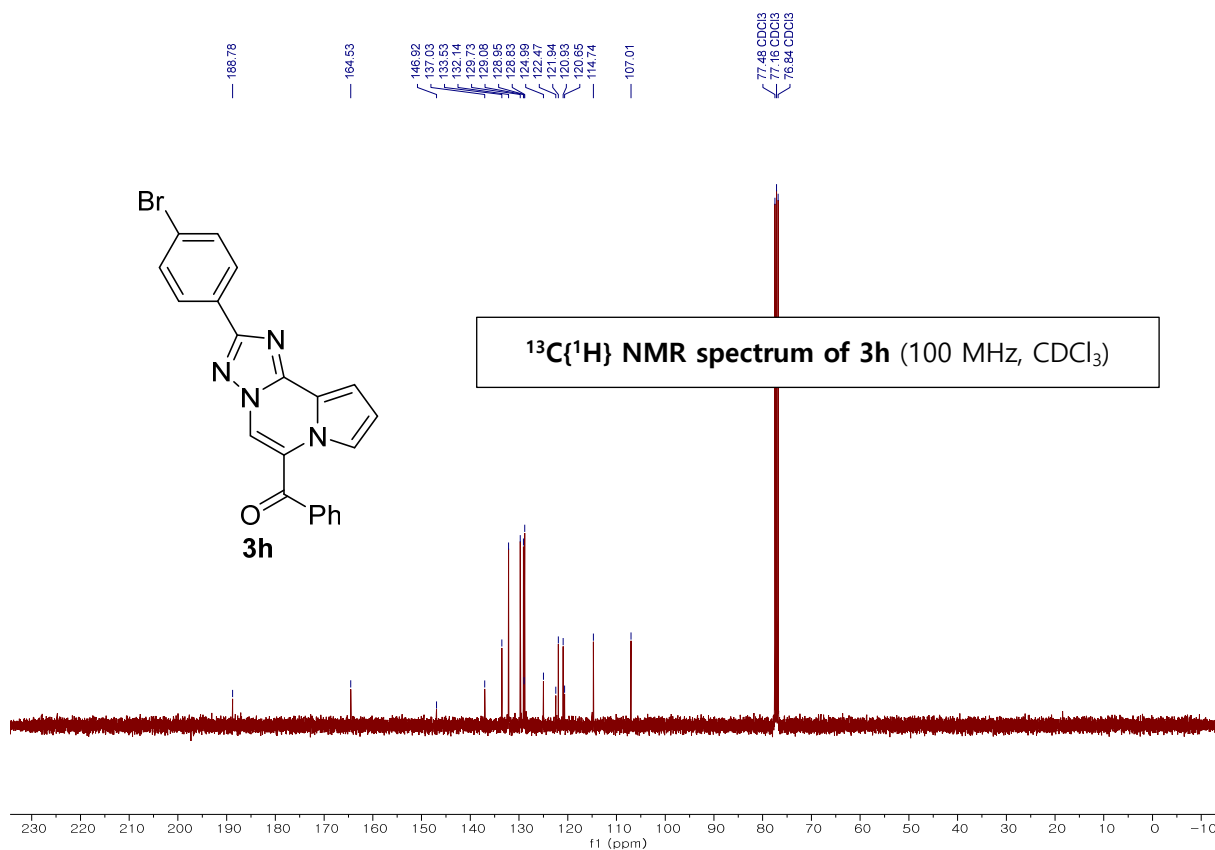

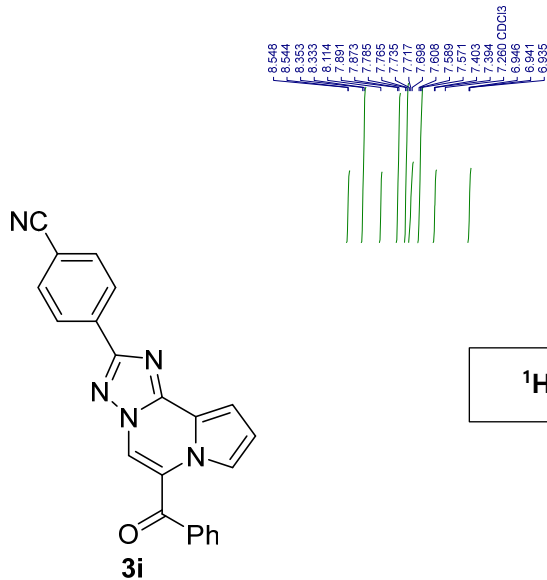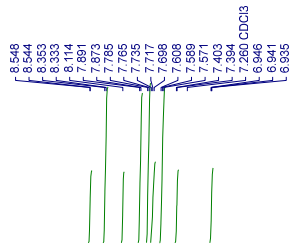

<sup>1</sup>H NMR spectrum of **3i** (400 MHz, CDCl<sub>3</sub>)

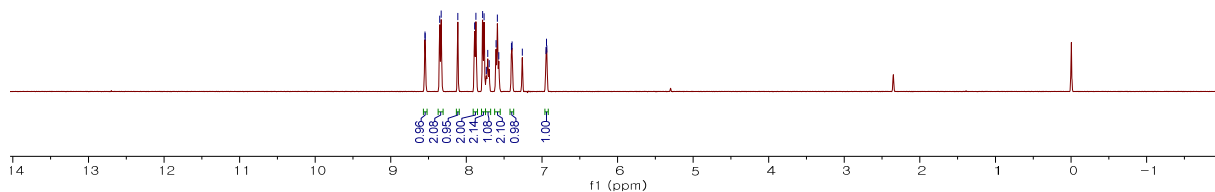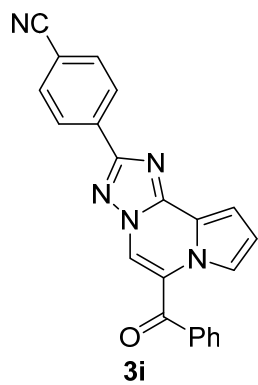

<sup>13</sup>C{<sup>1</sup>H} NMR spectrum of **3i** (100 MHz, CDCl<sub>3</sub>)

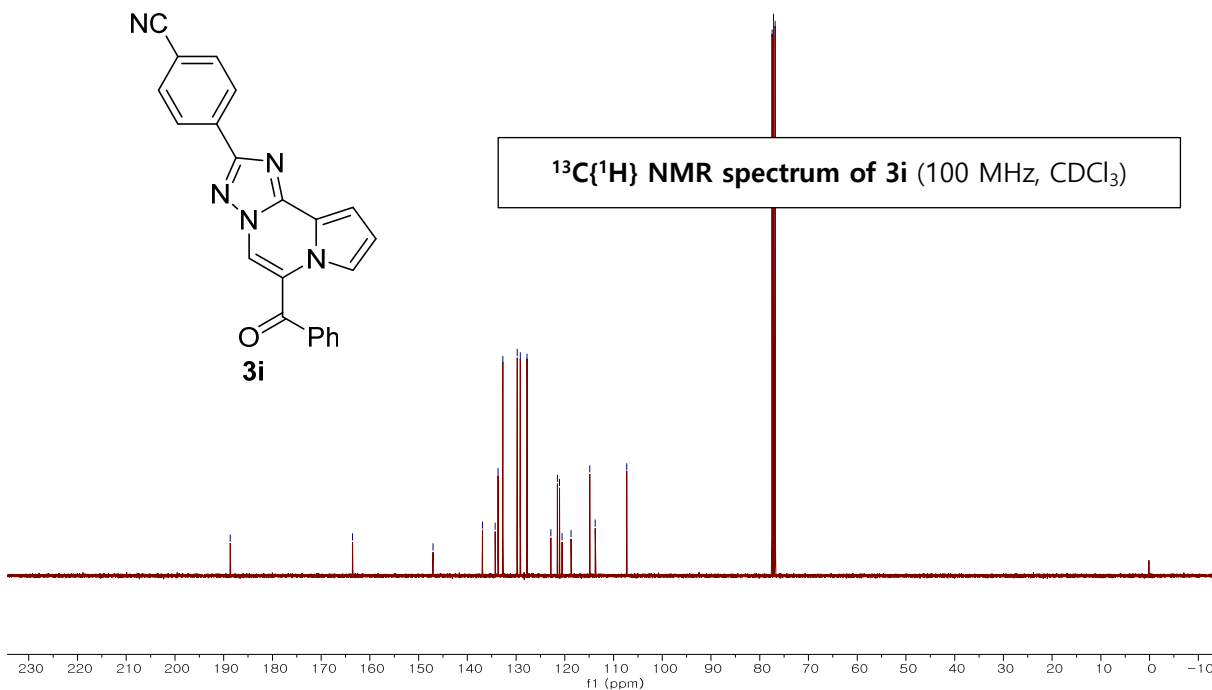

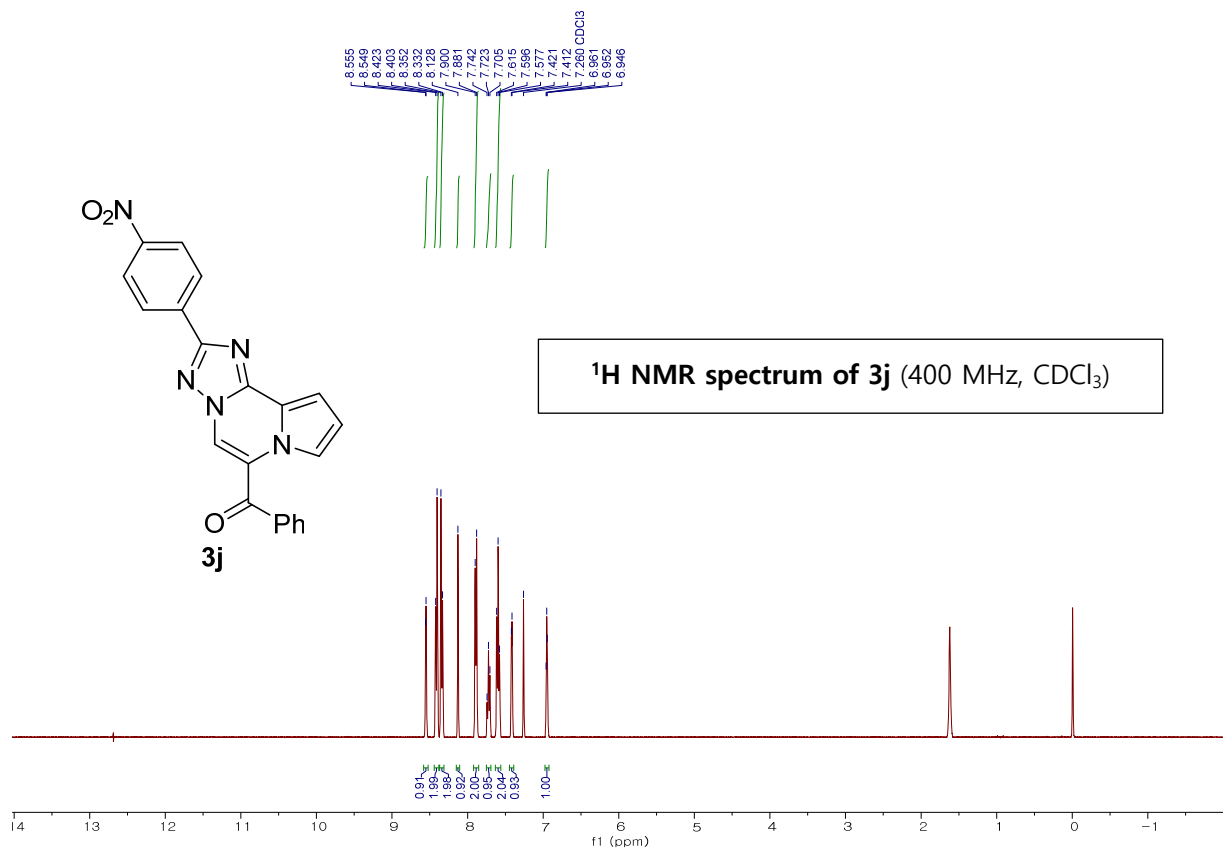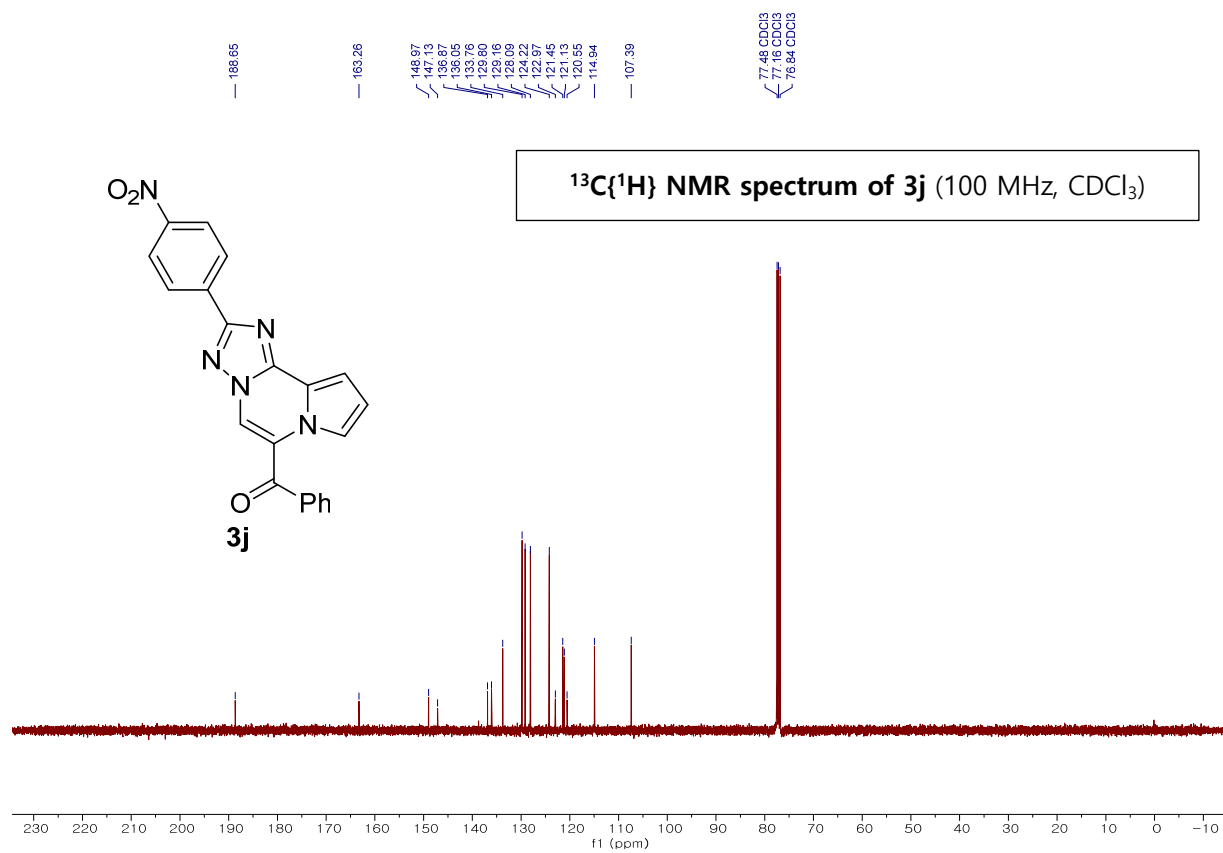

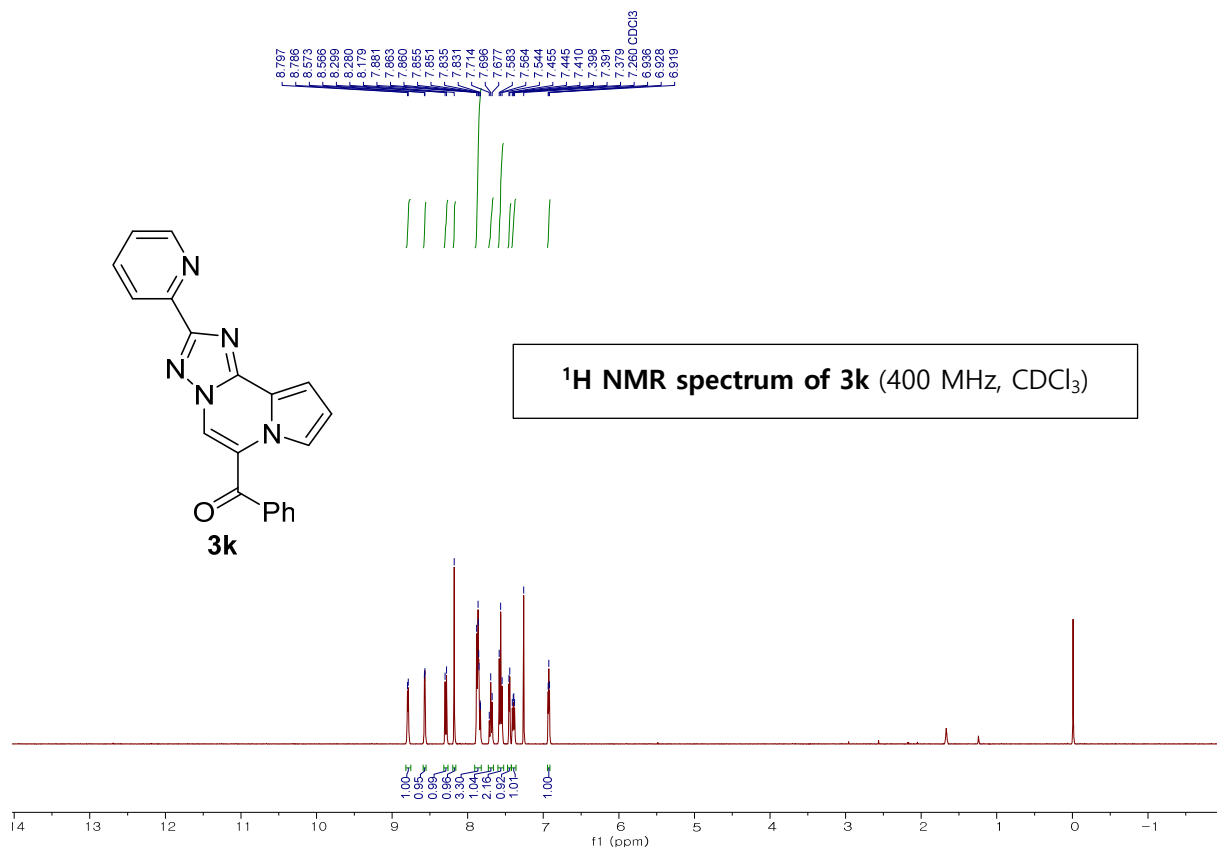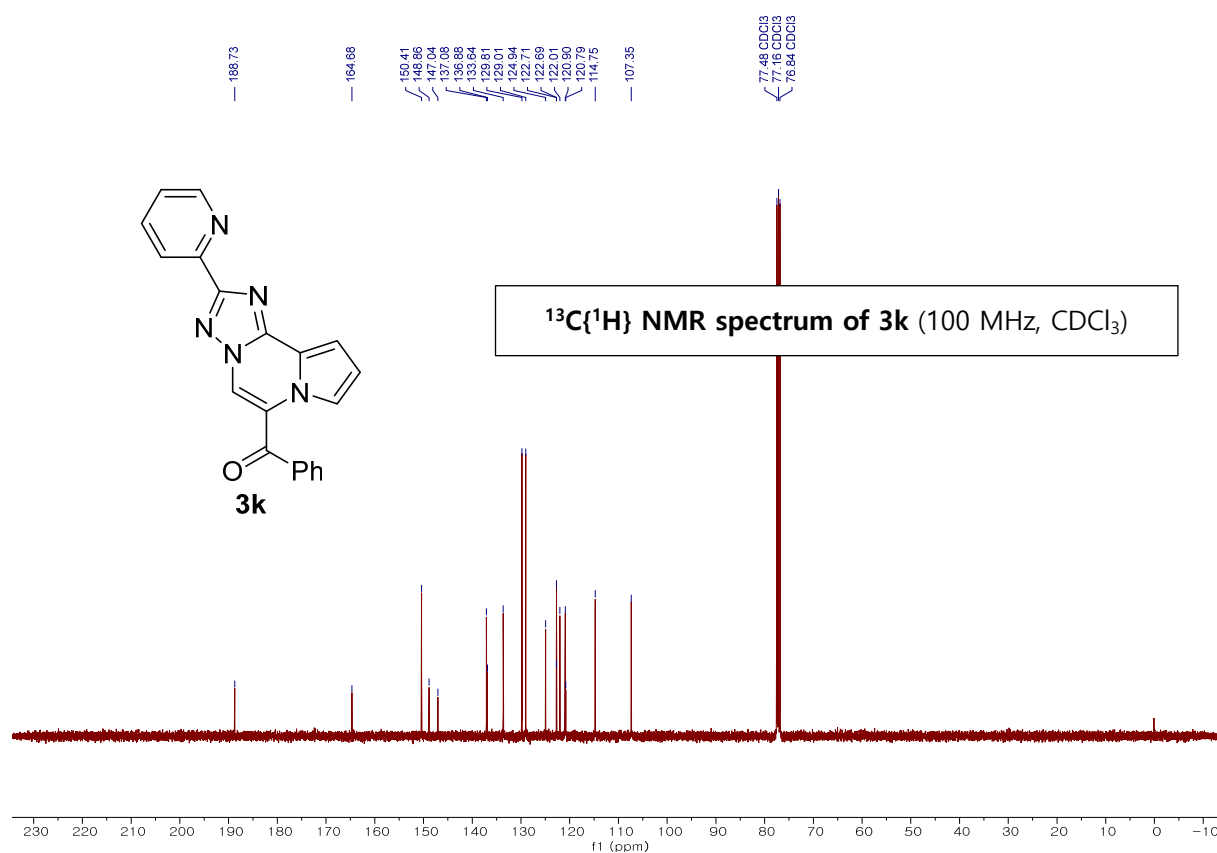

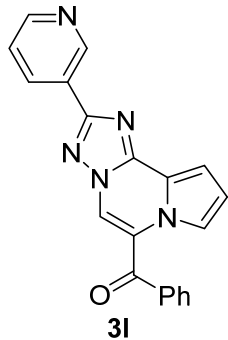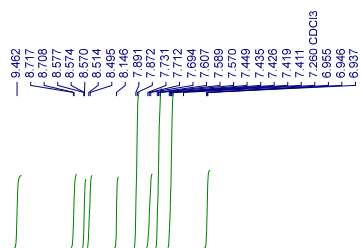

**<sup>1</sup>H NMR spectrum of 3I (400 MHz, CDCl<sub>3</sub>)**

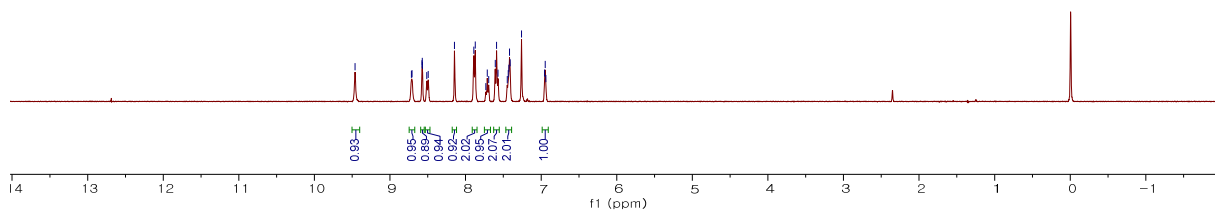

**<sup>13</sup>C{<sup>1</sup>H} NMR spectrum of 3I (100 MHz, CDCl<sub>3</sub>)**

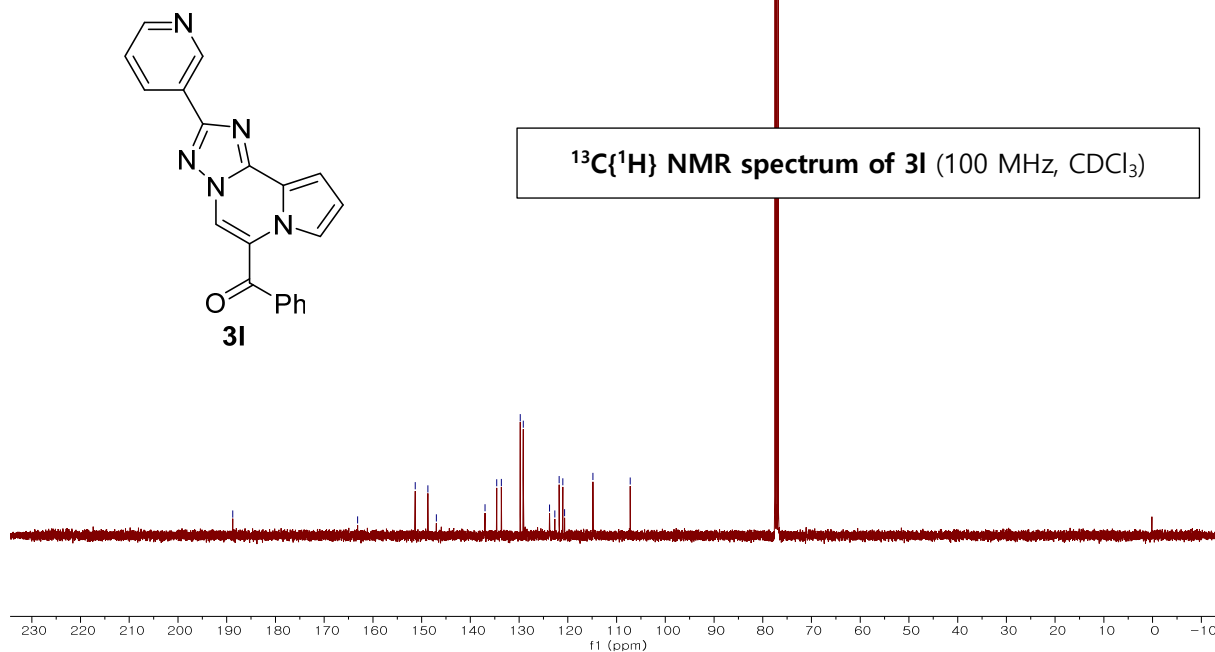

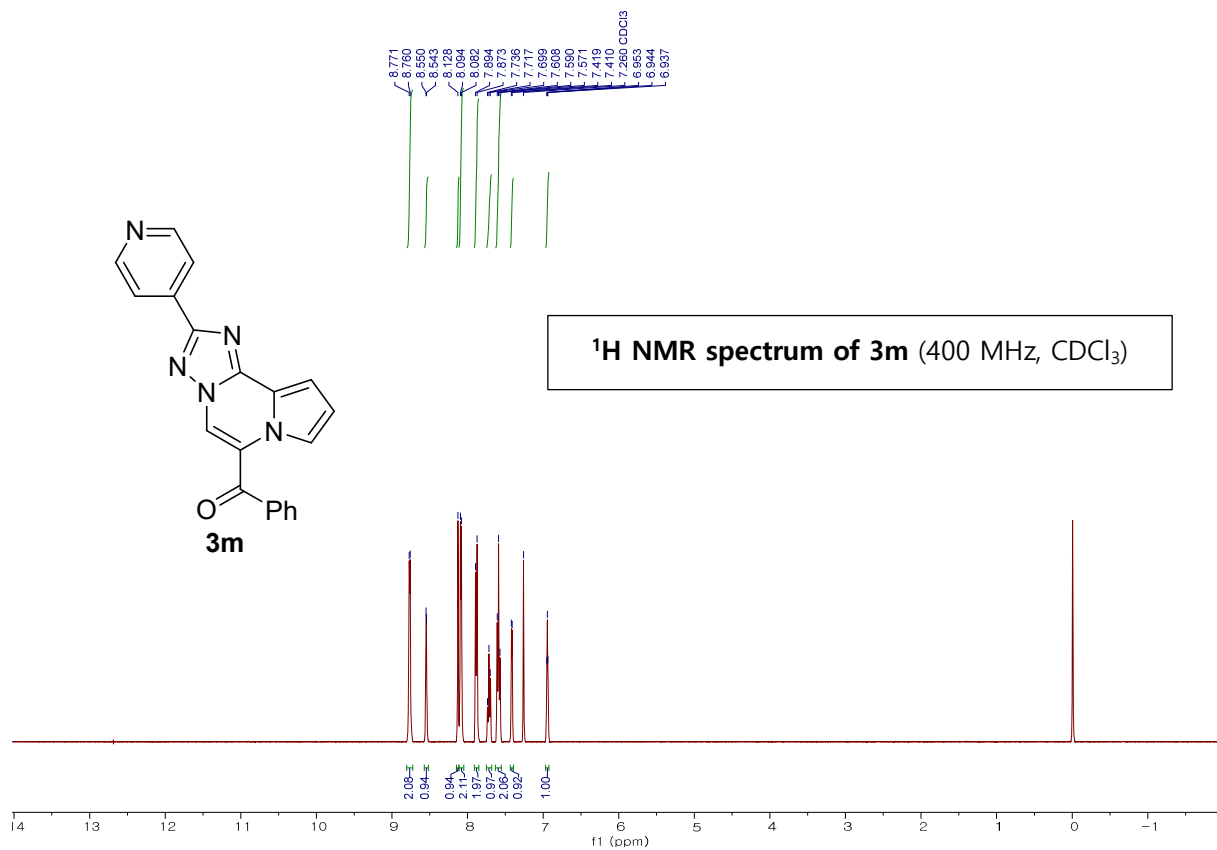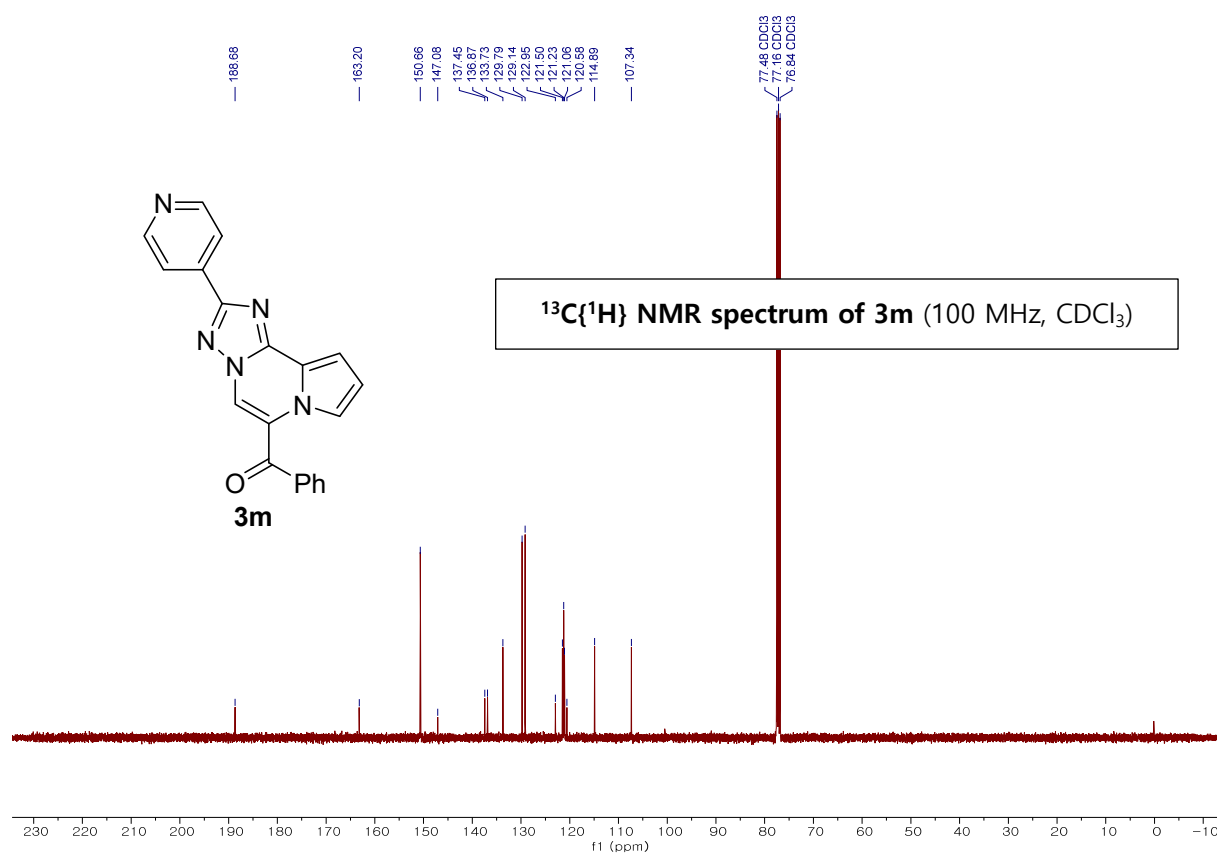



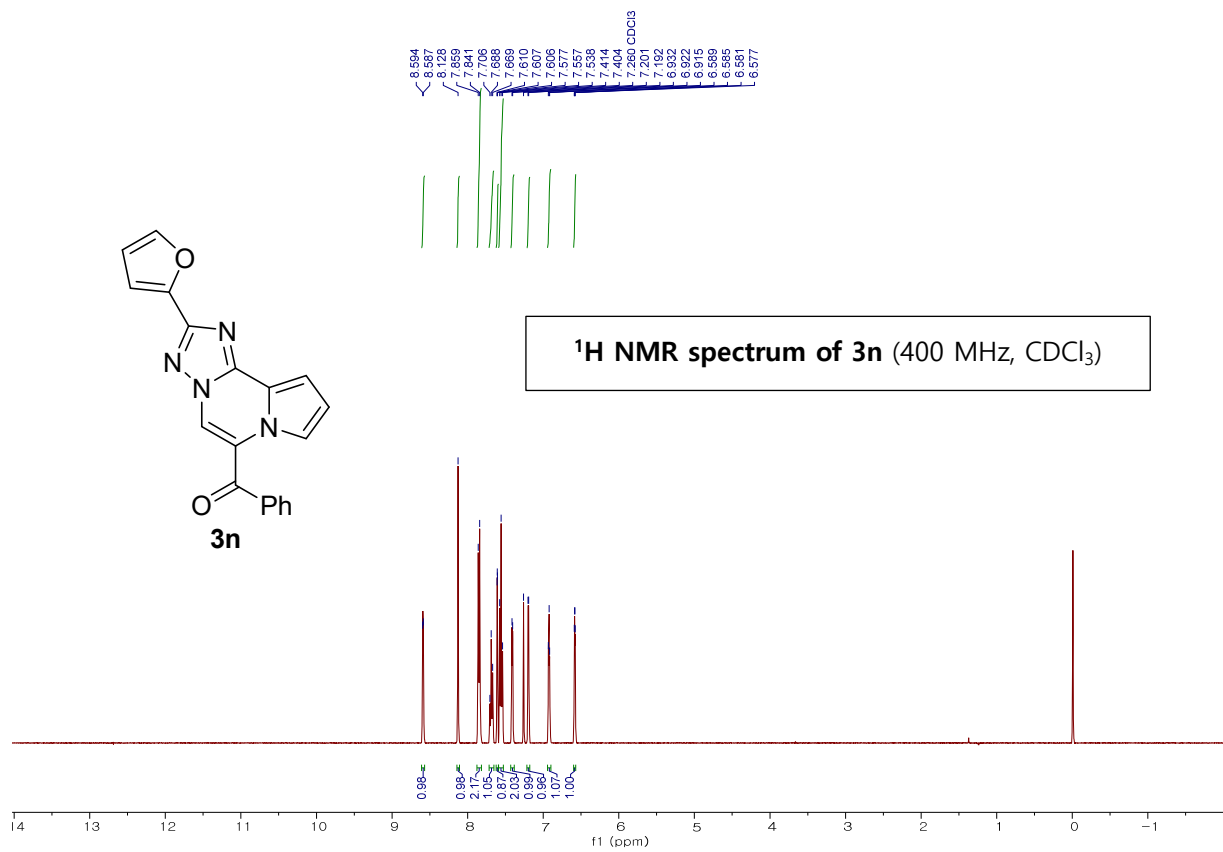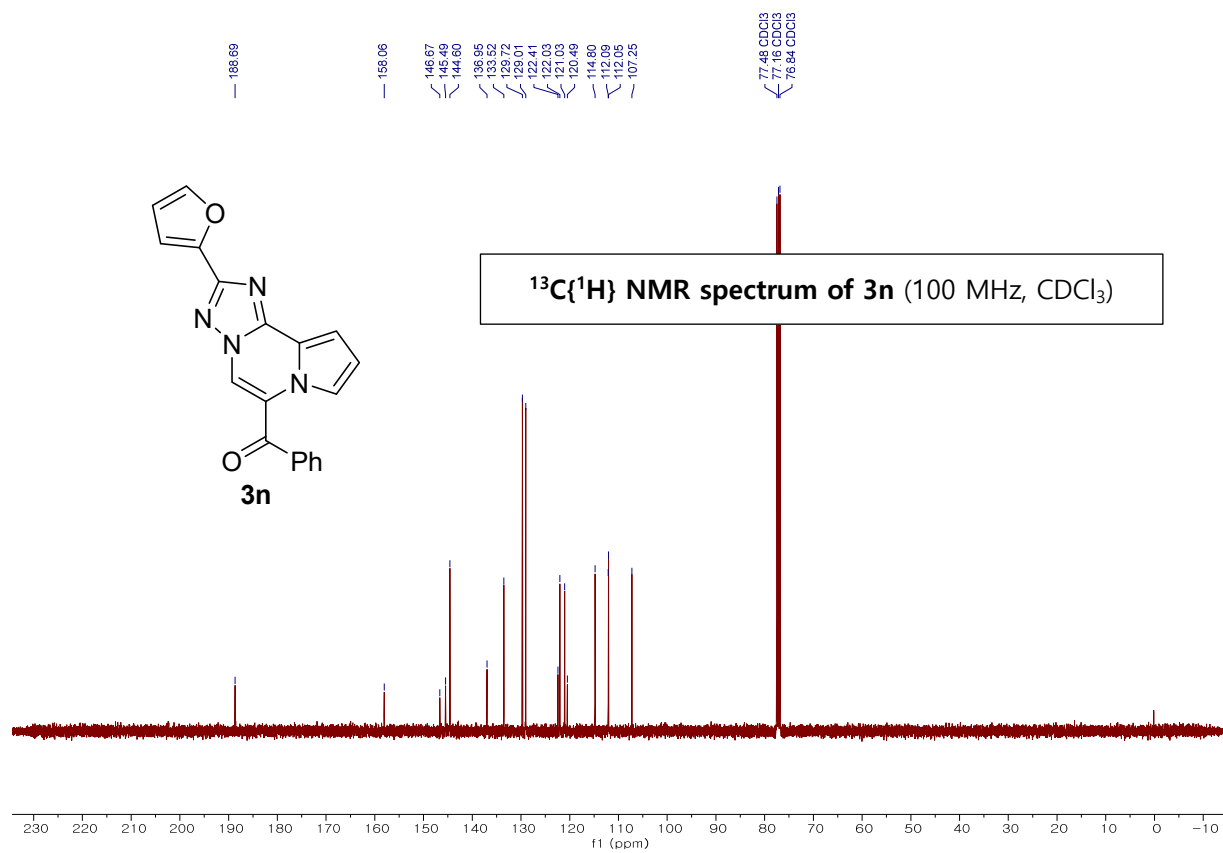

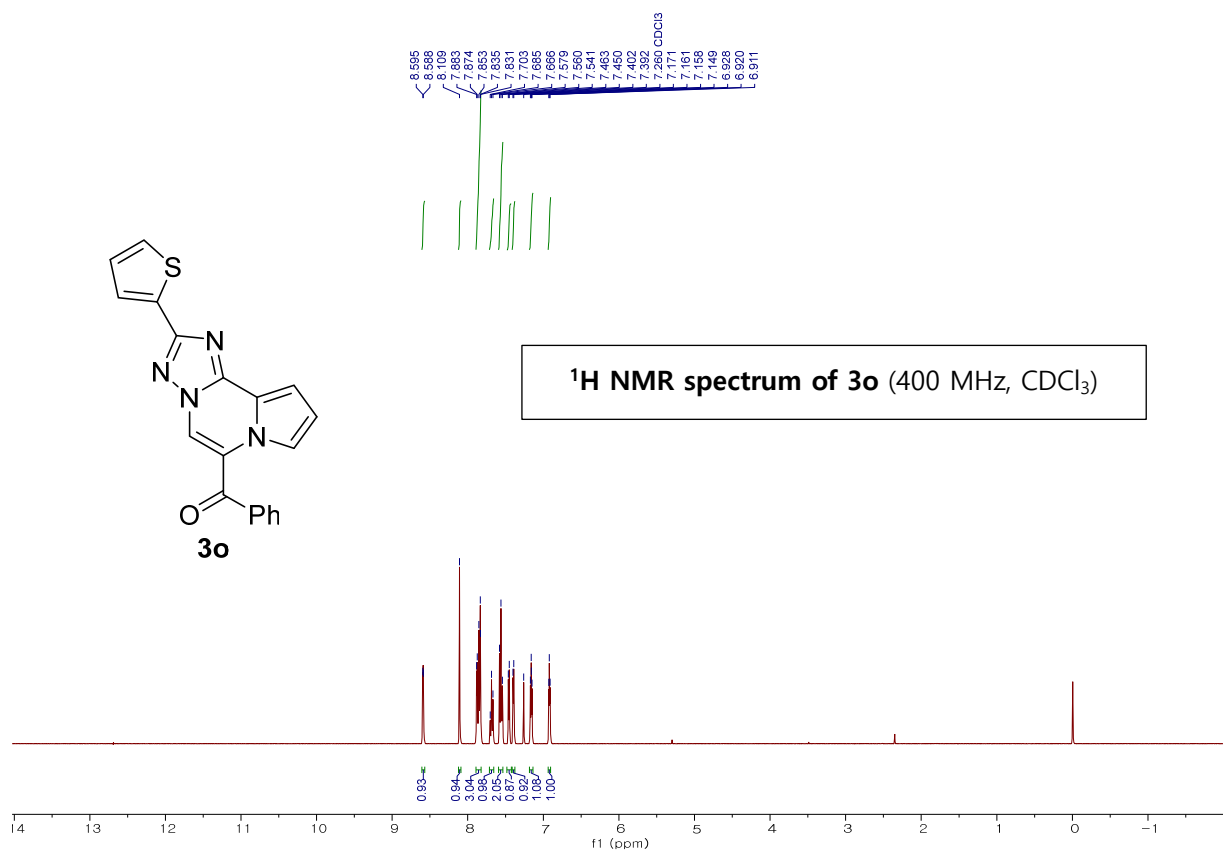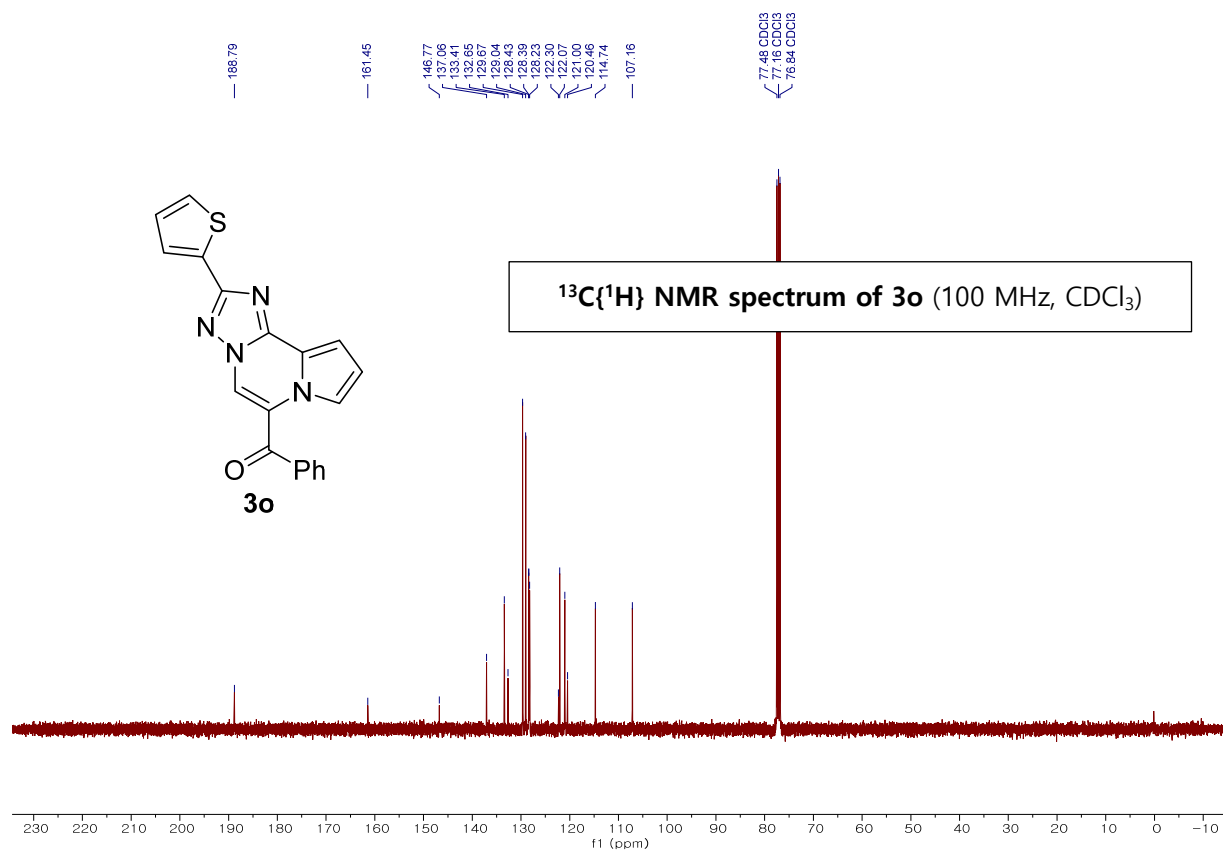

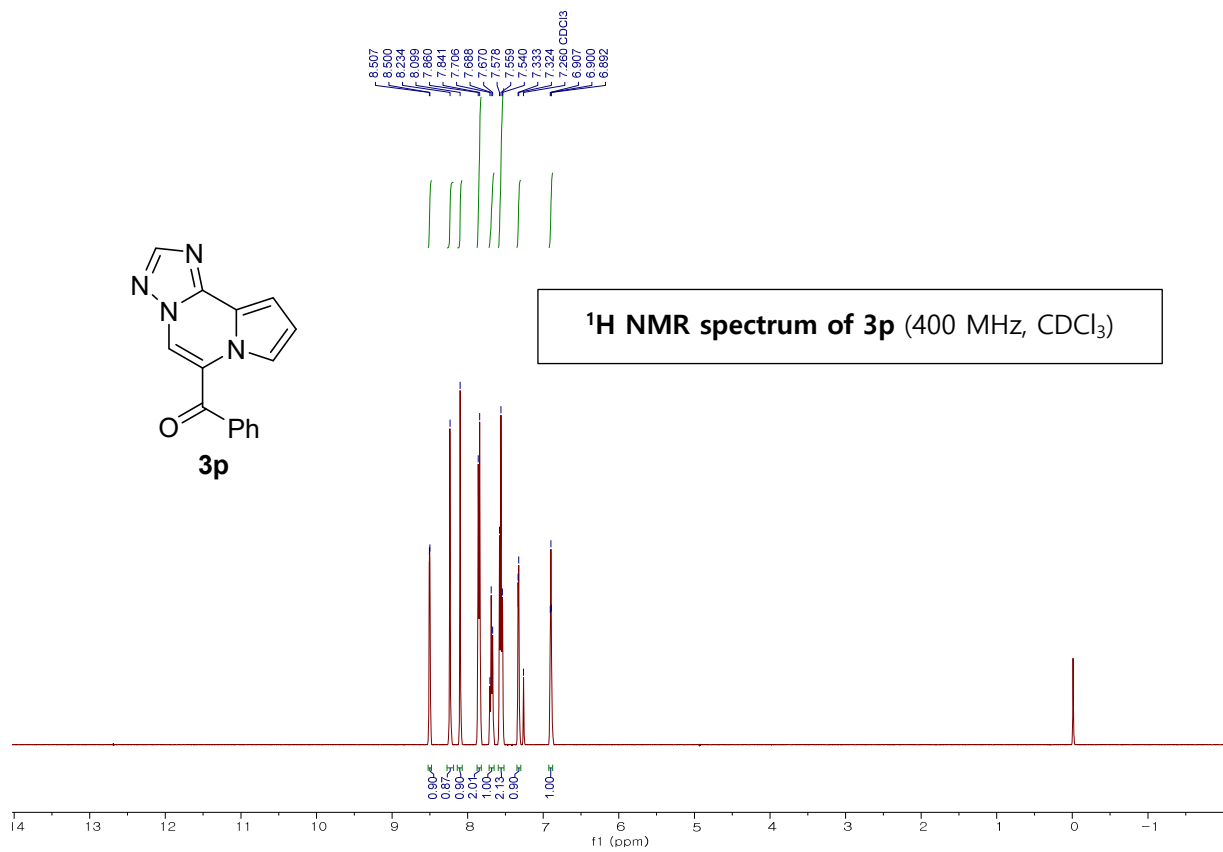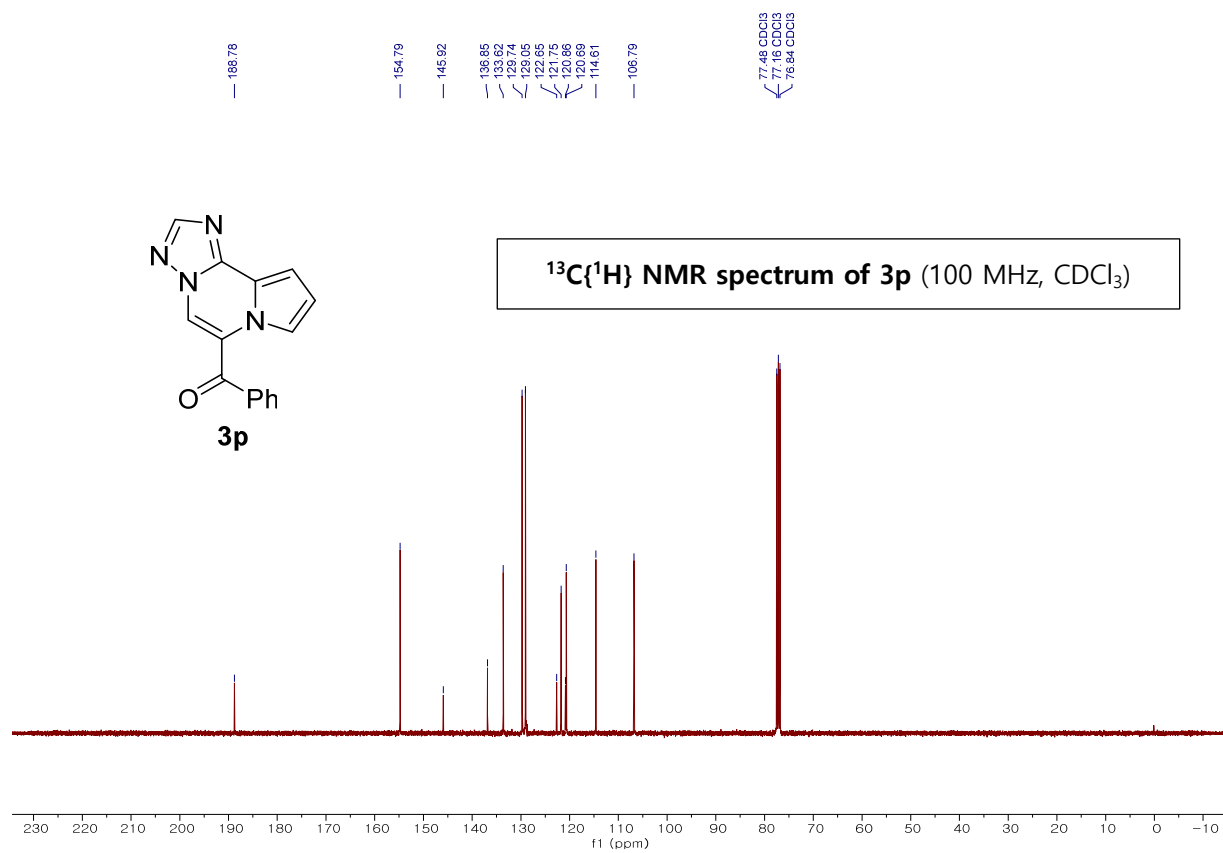

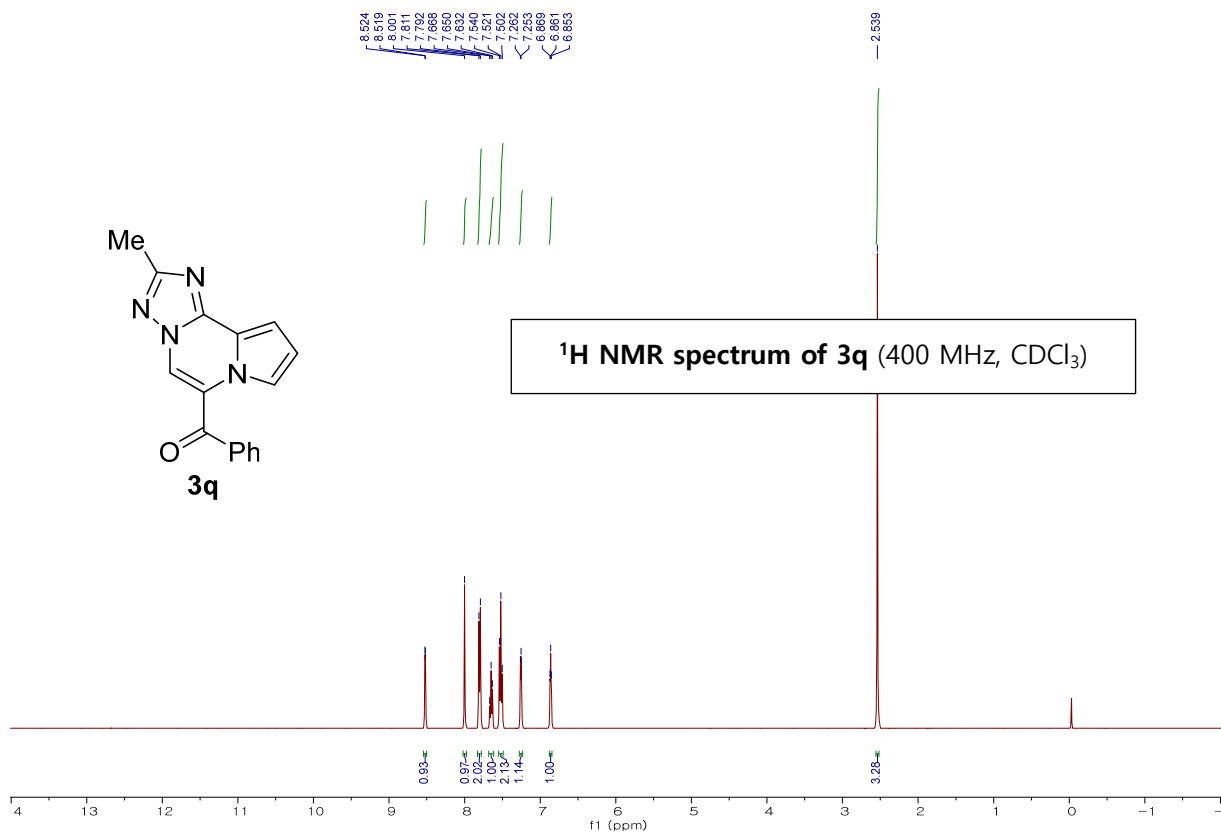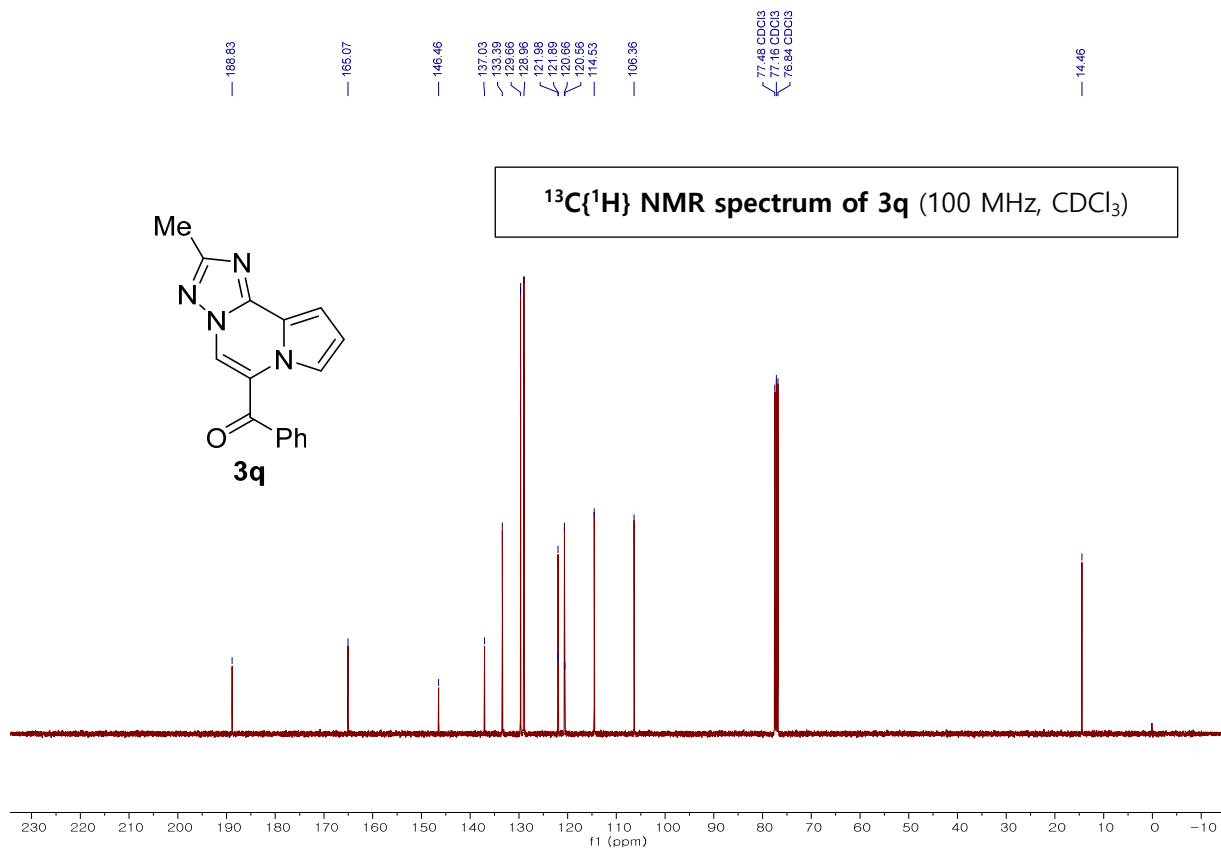

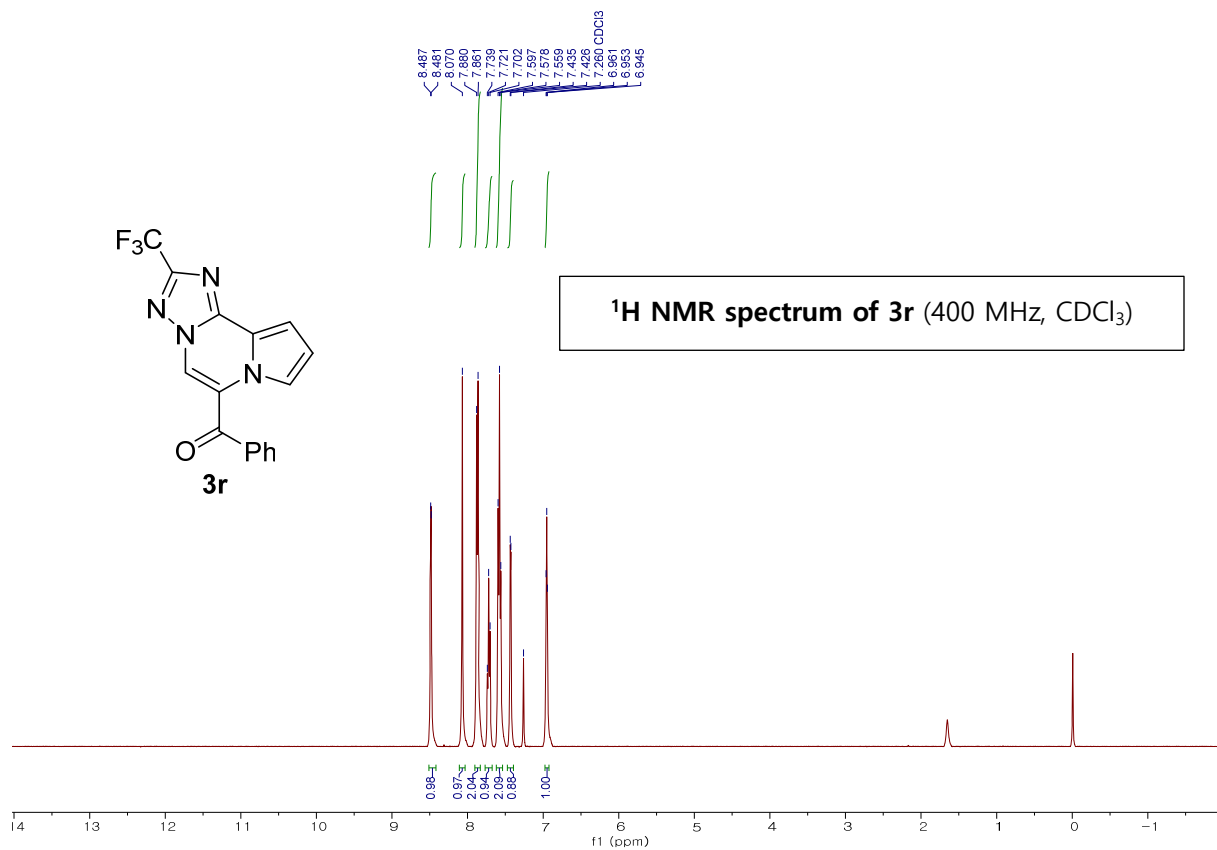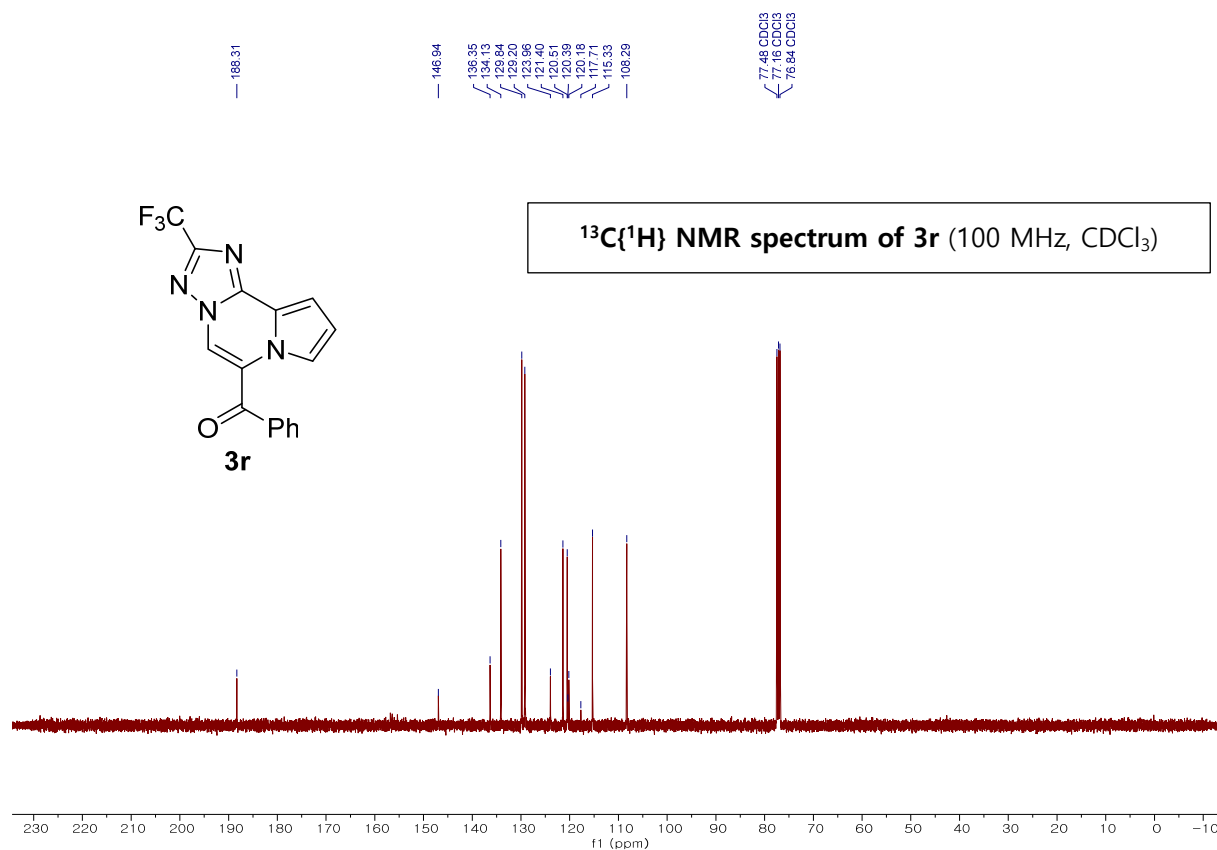

—65.437

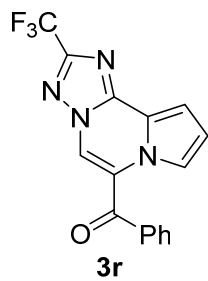

**<sup>19</sup>F NMR spectrum of 3r (376 MHz, CDCl<sub>3</sub>)**

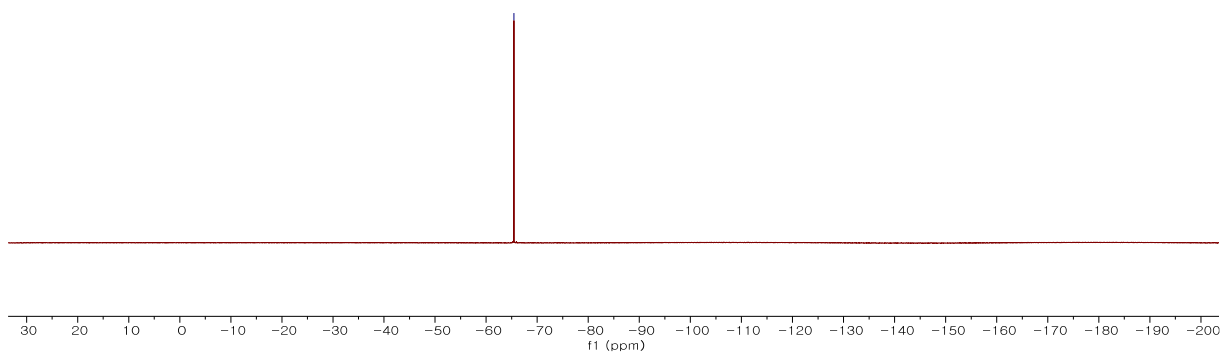

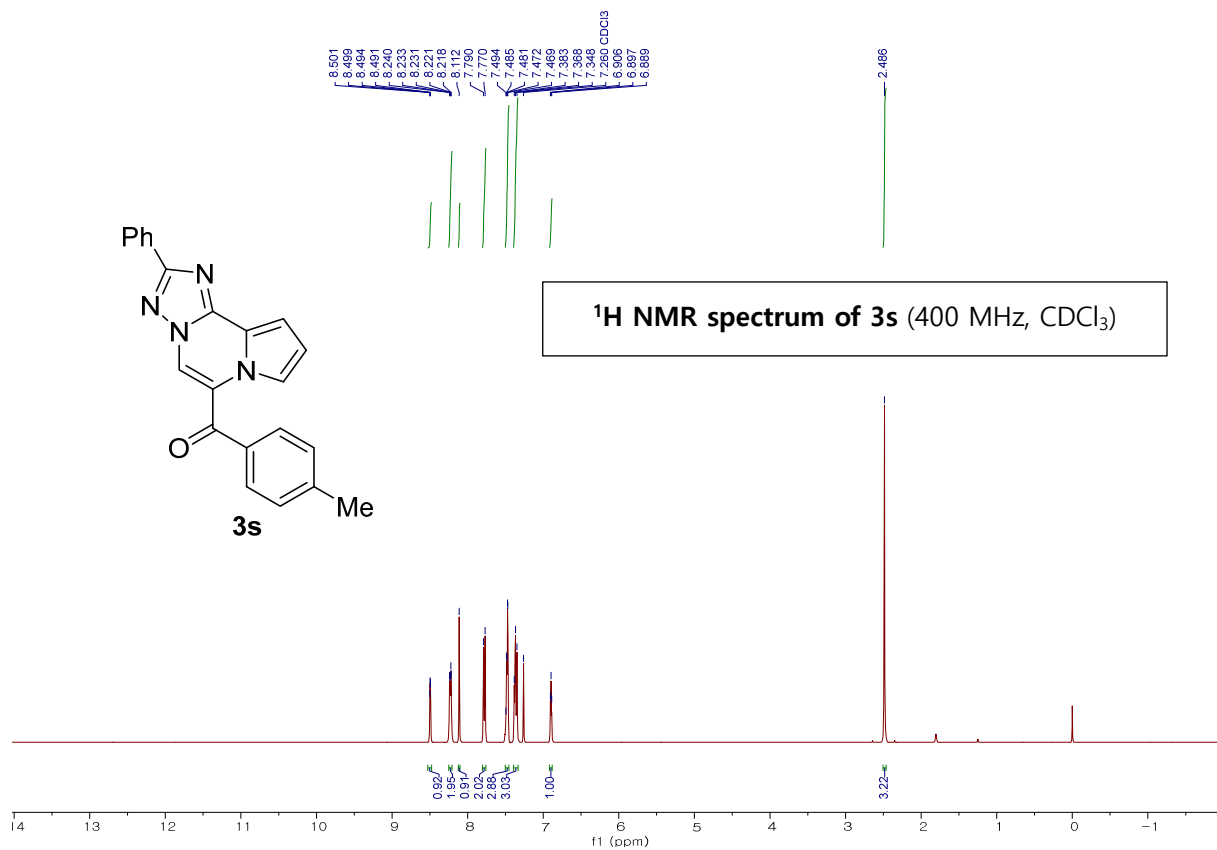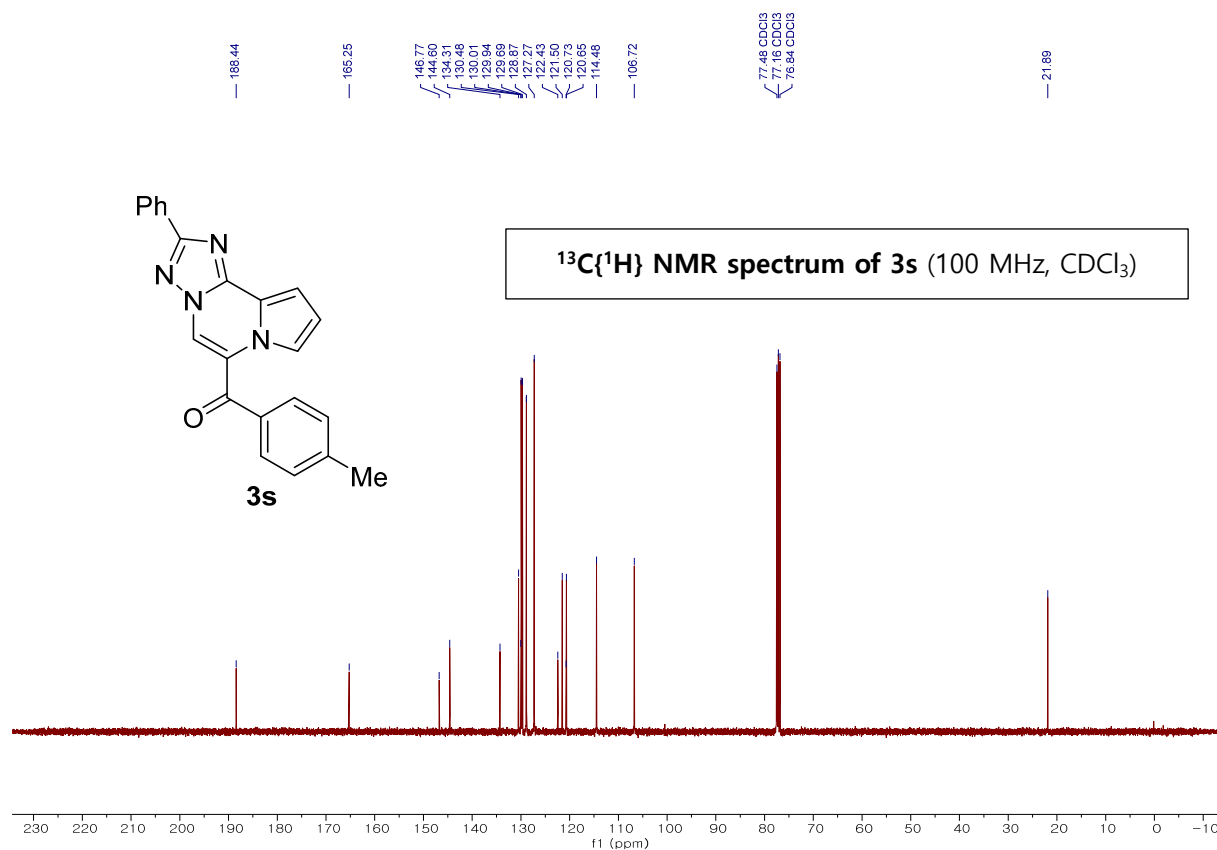

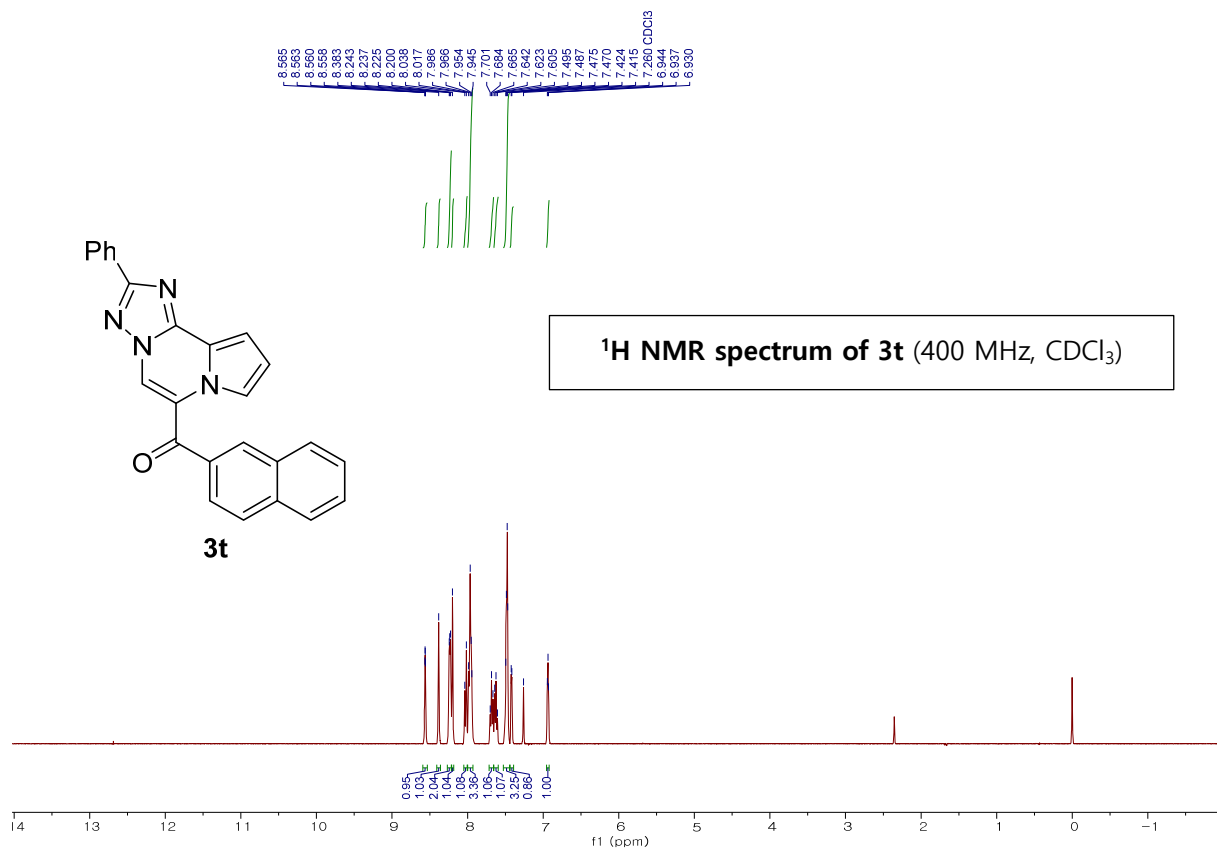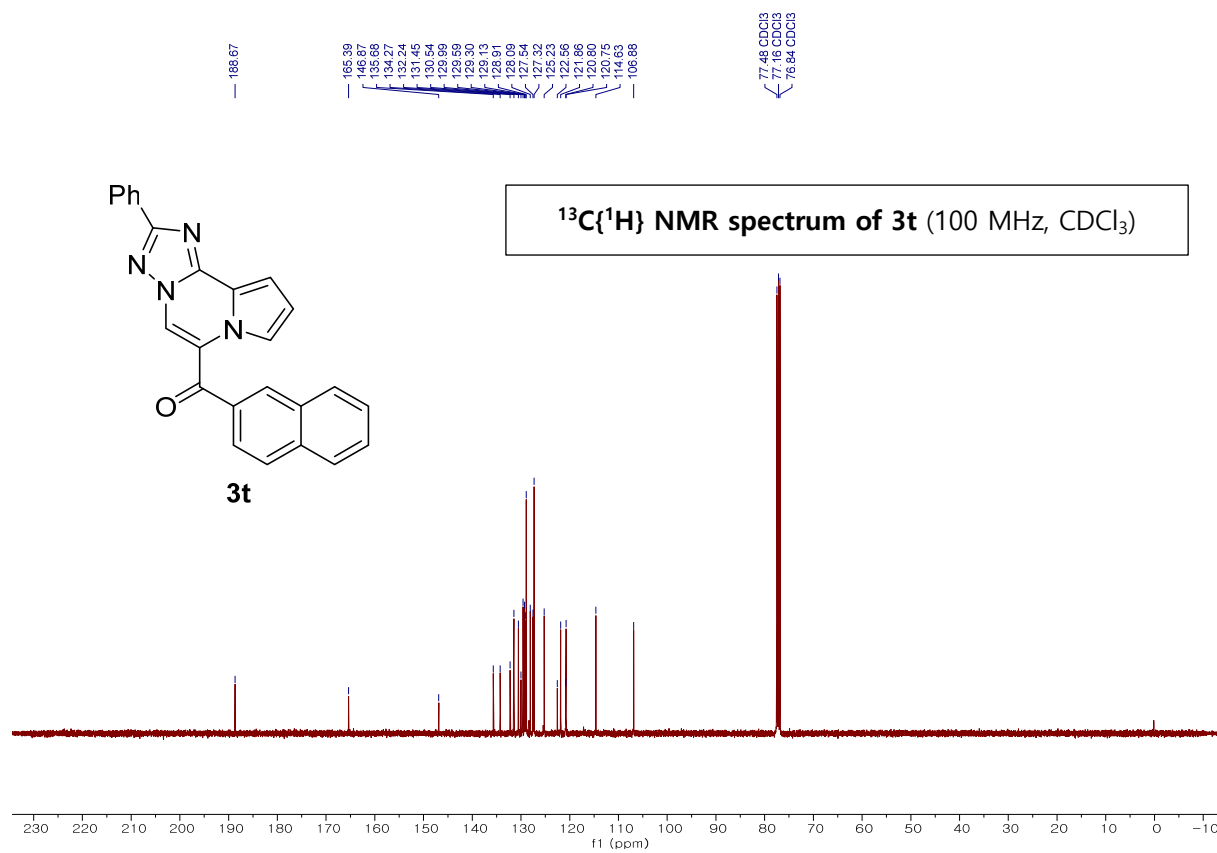



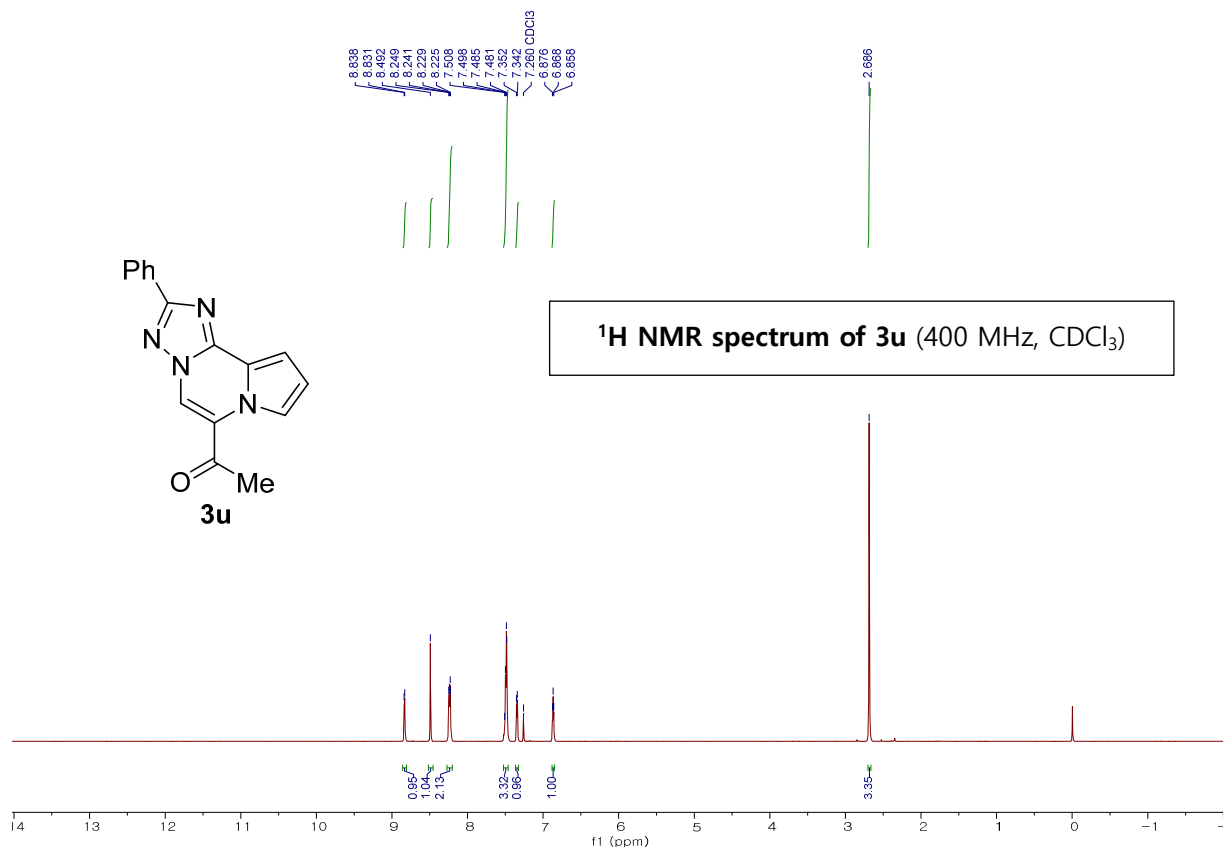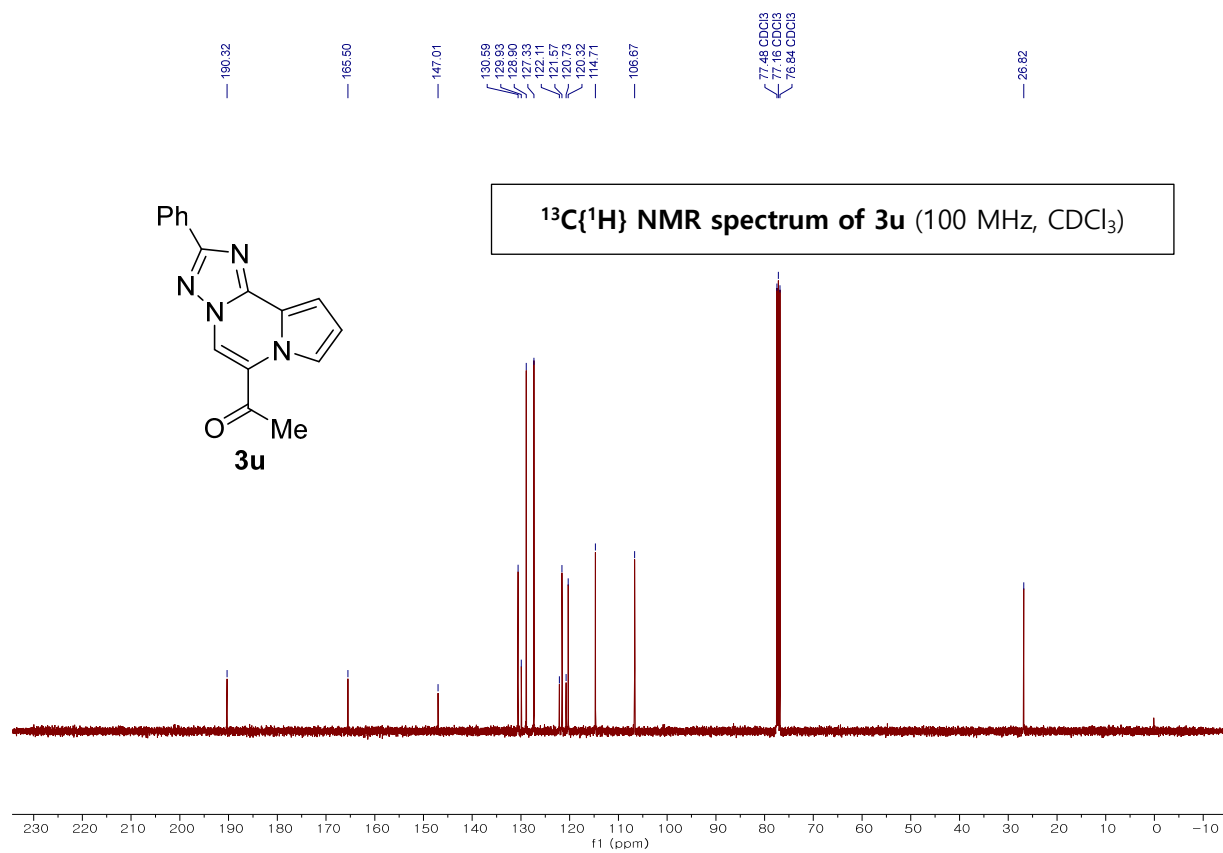

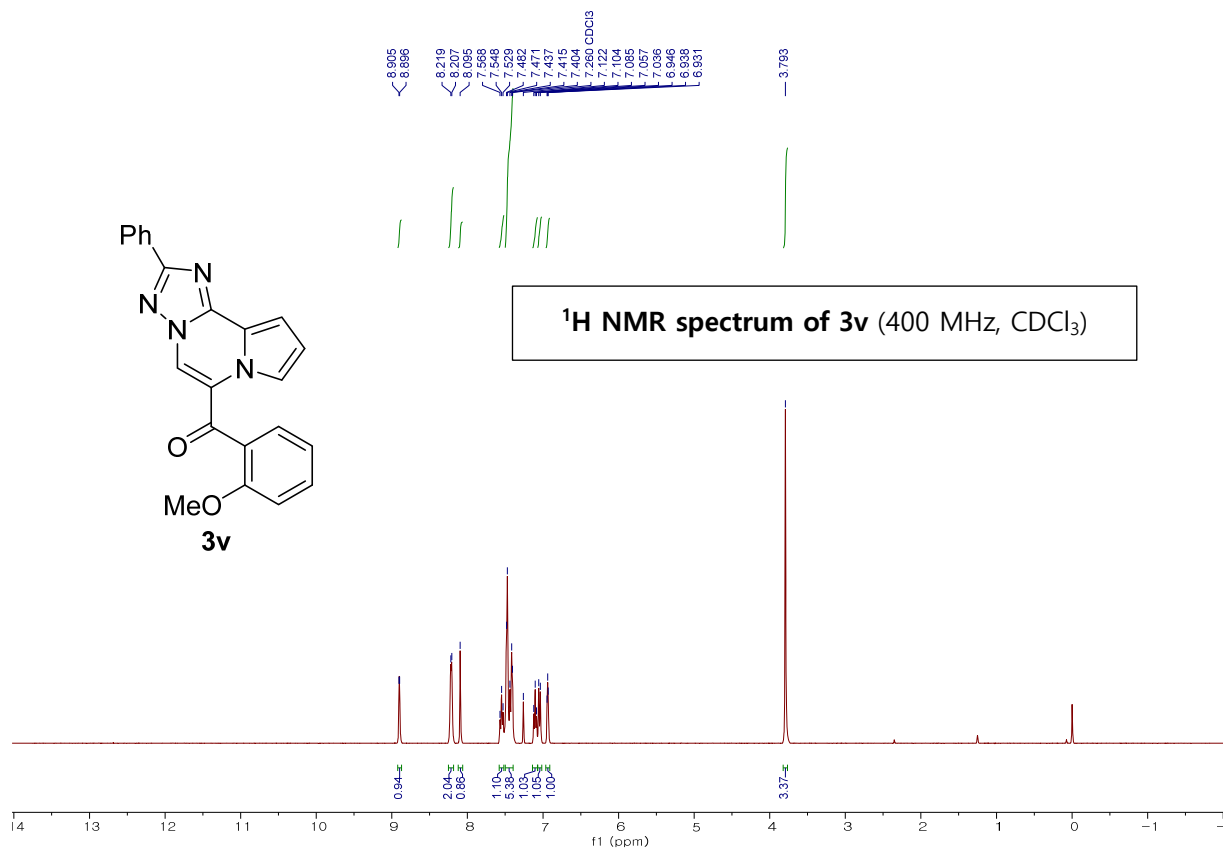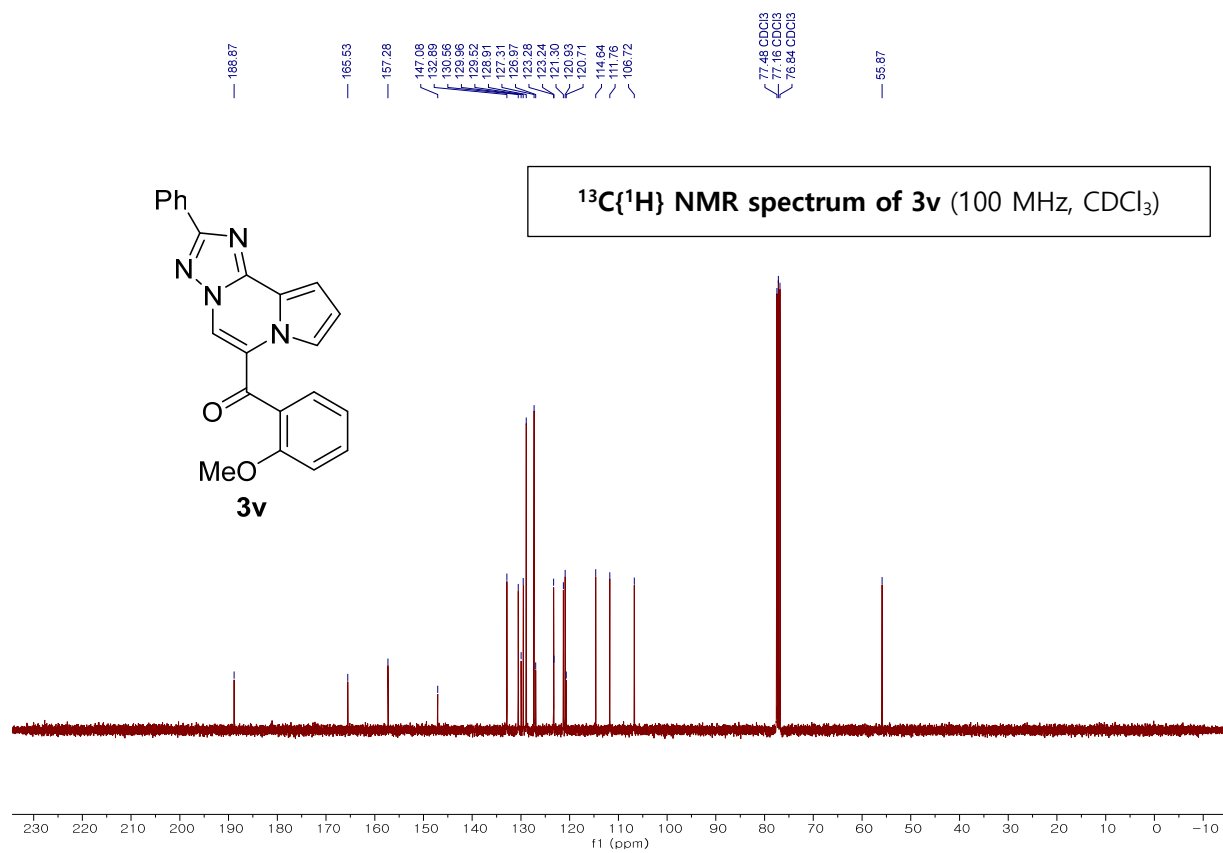

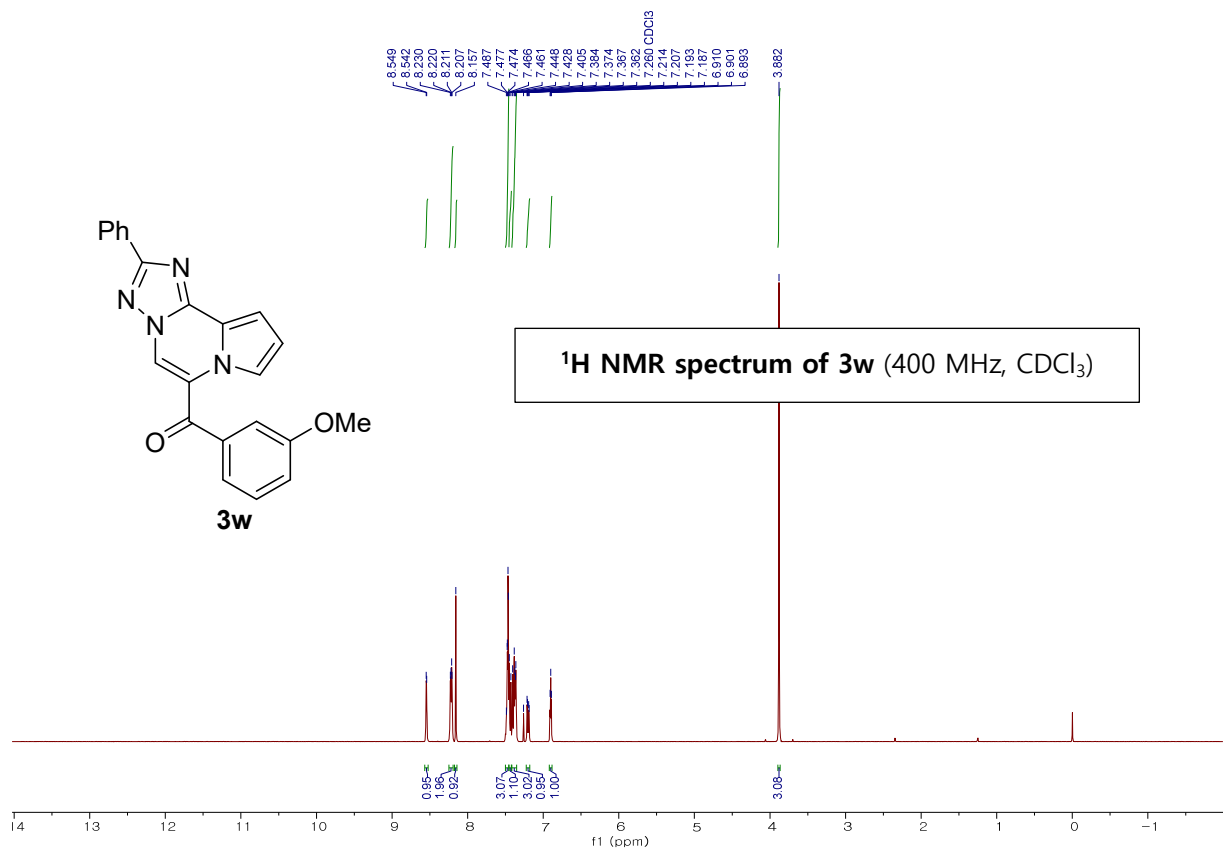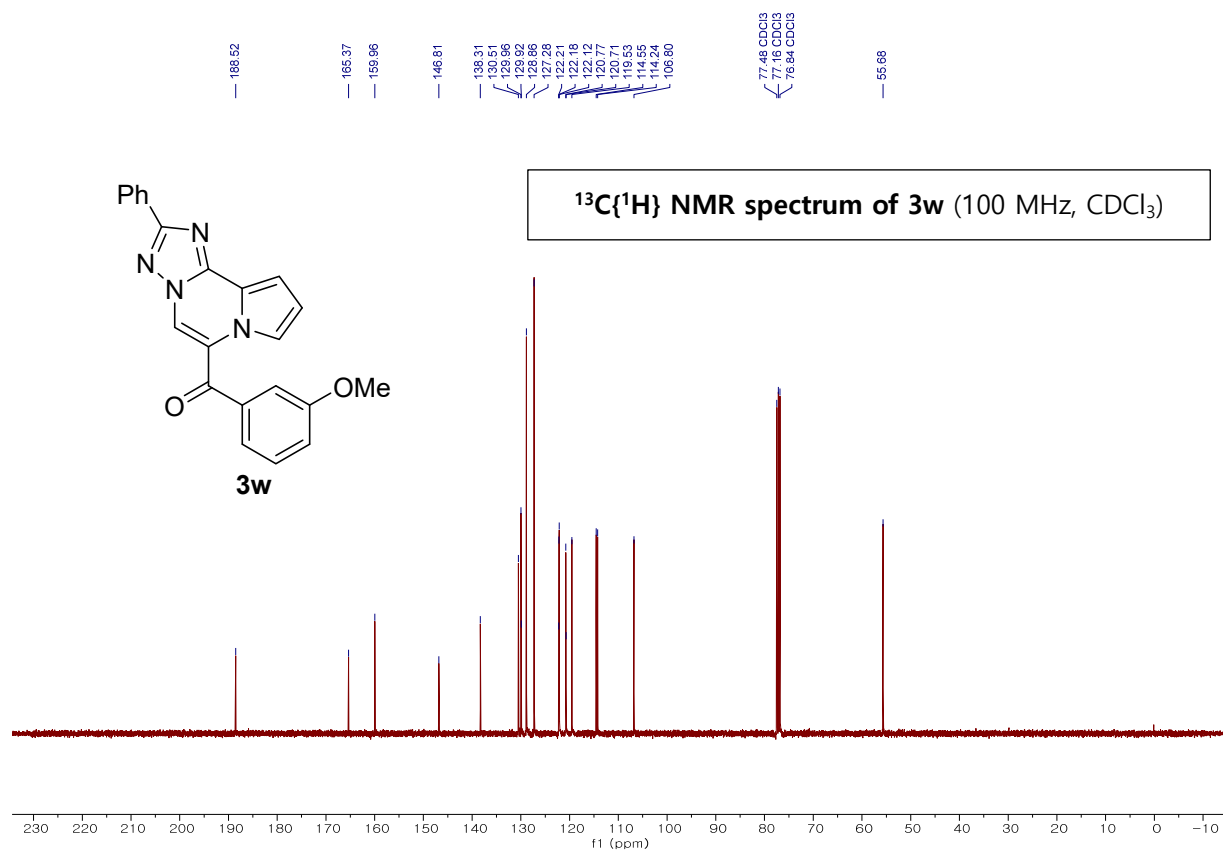

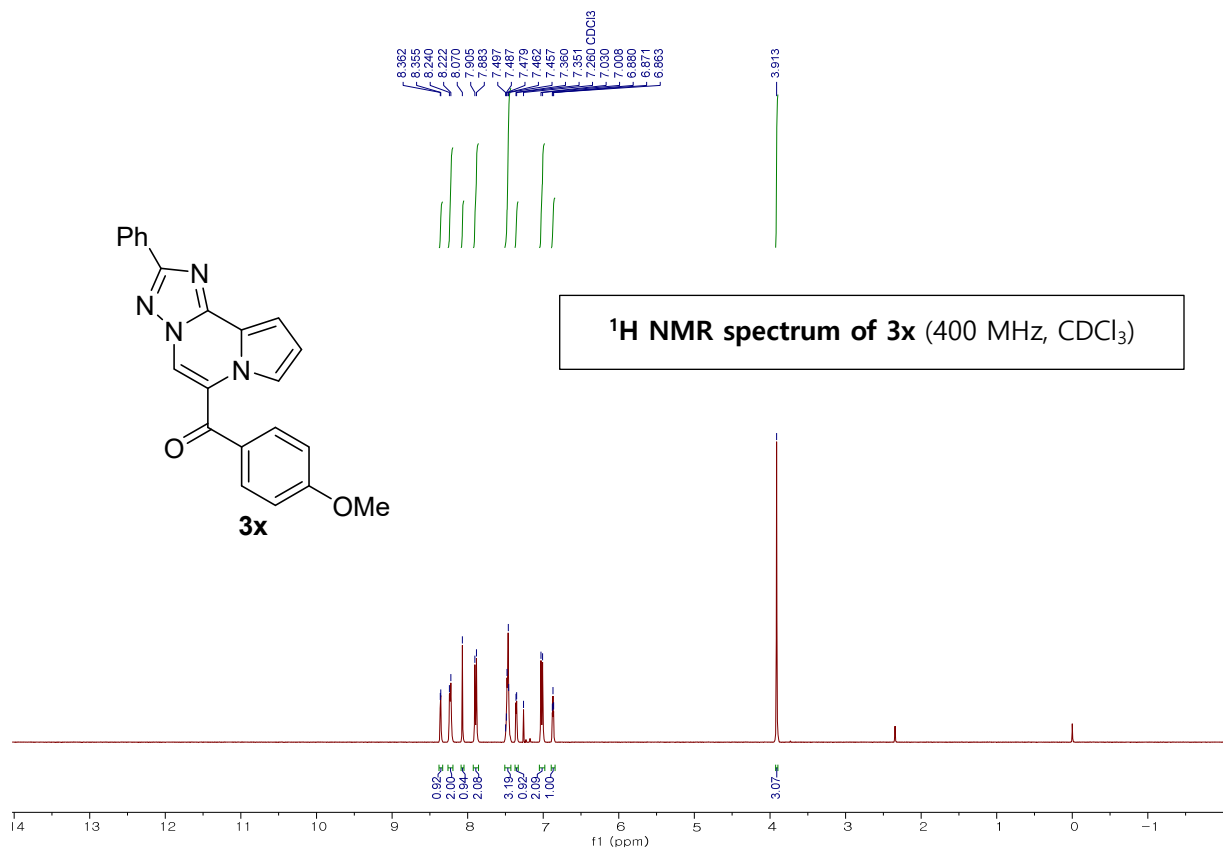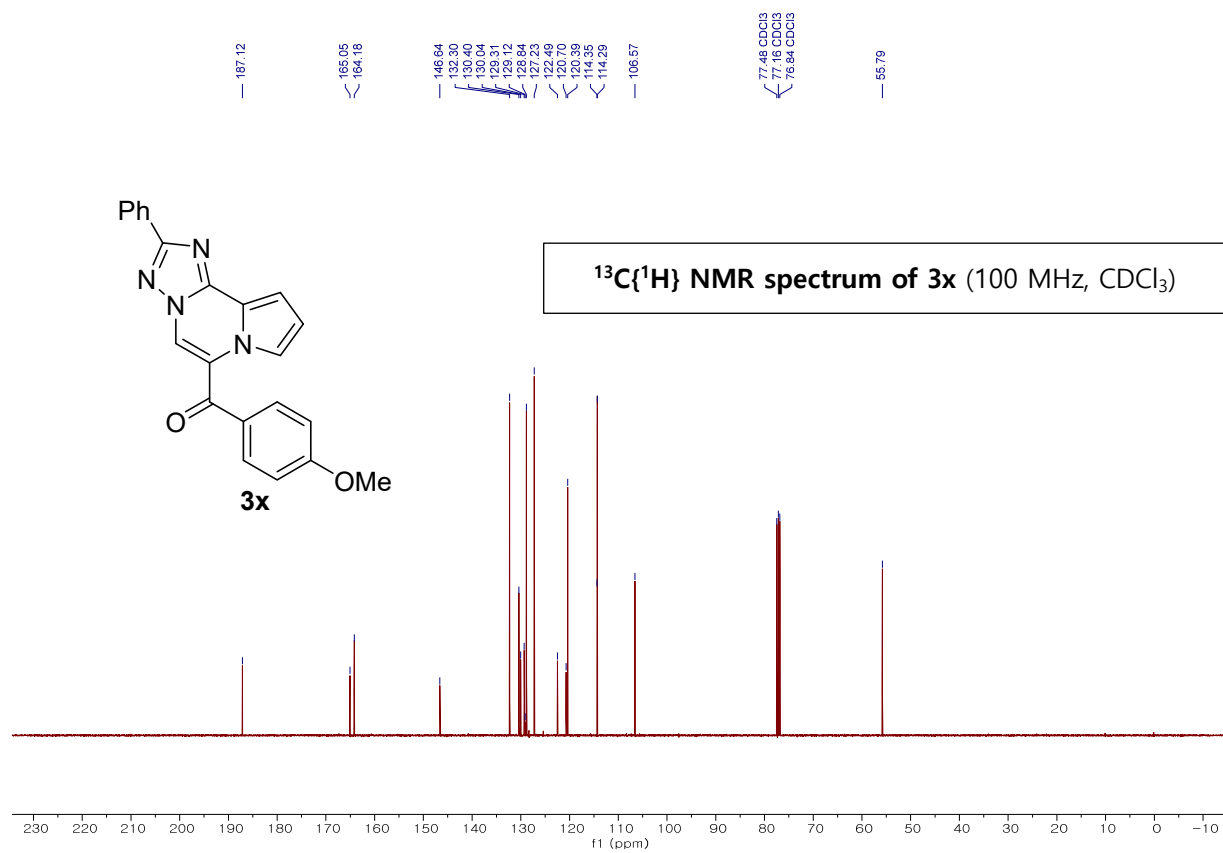

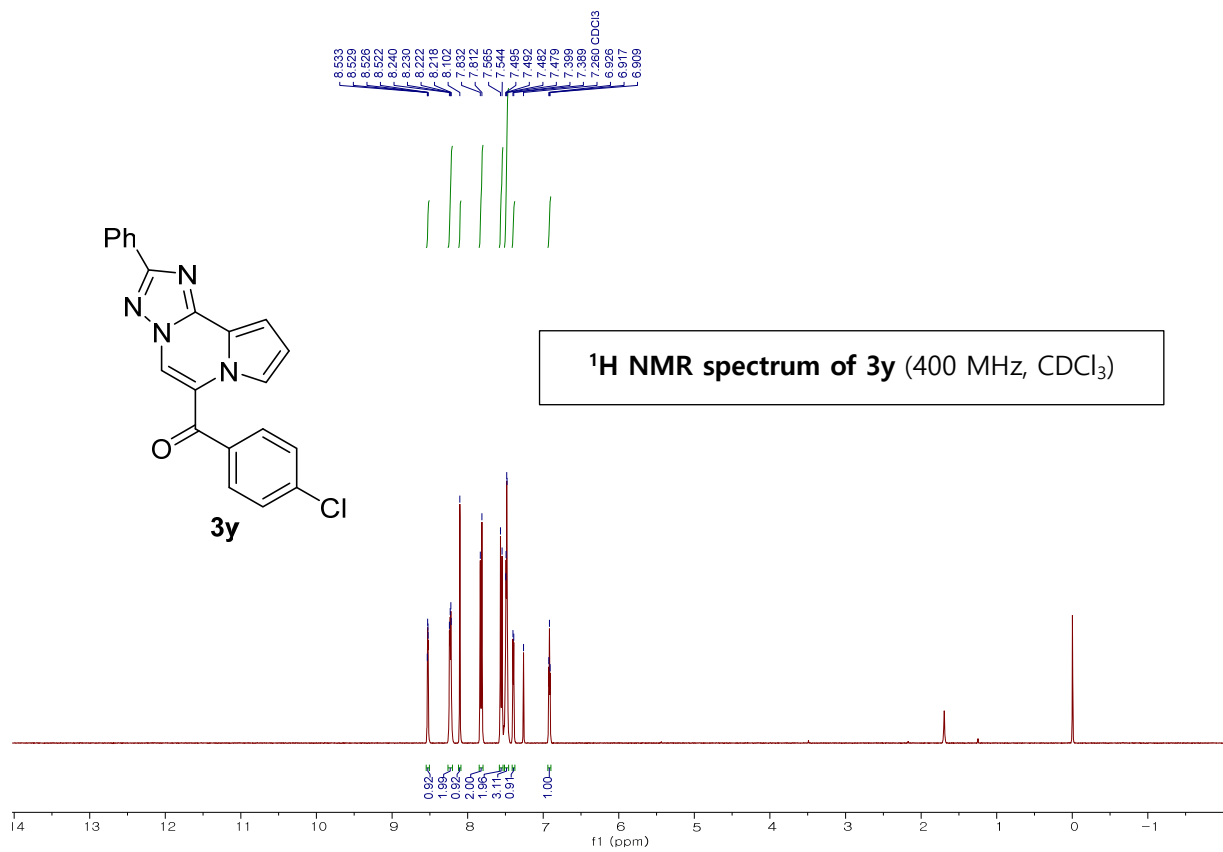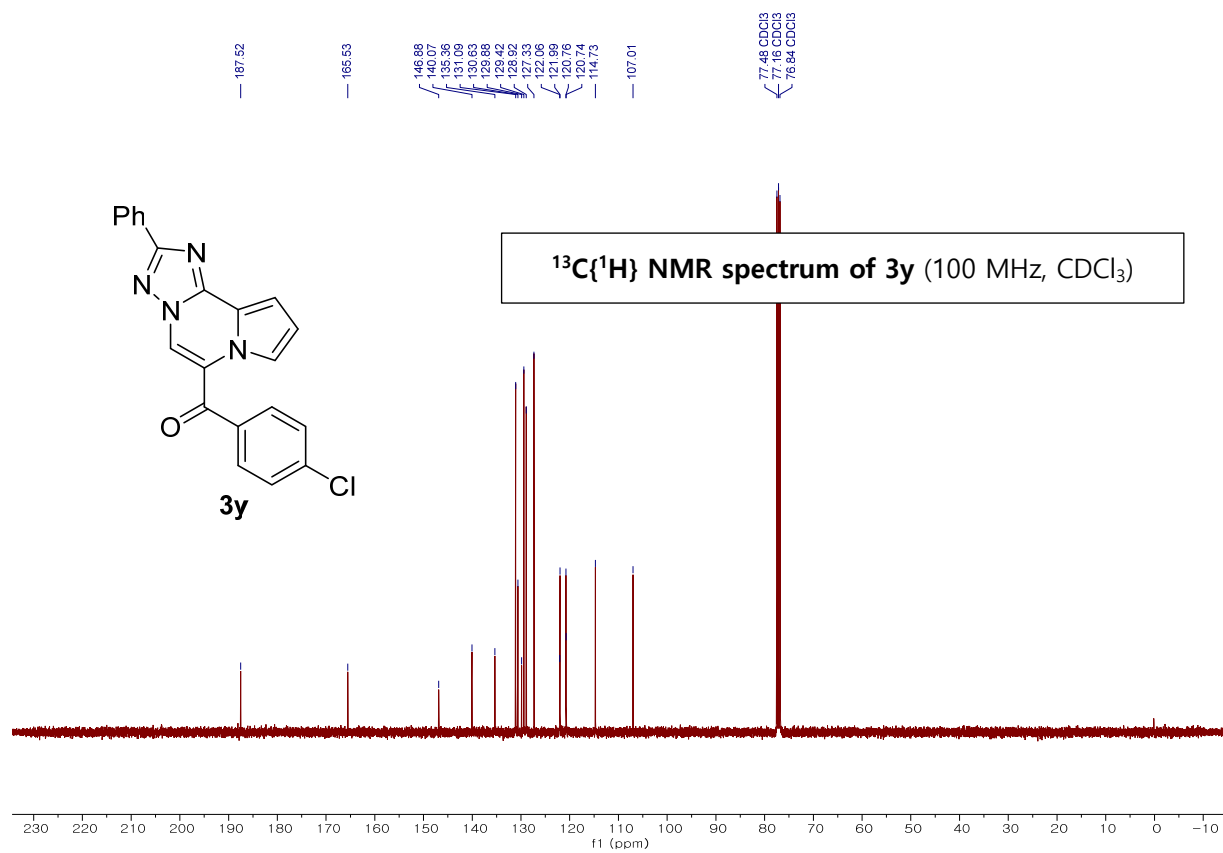

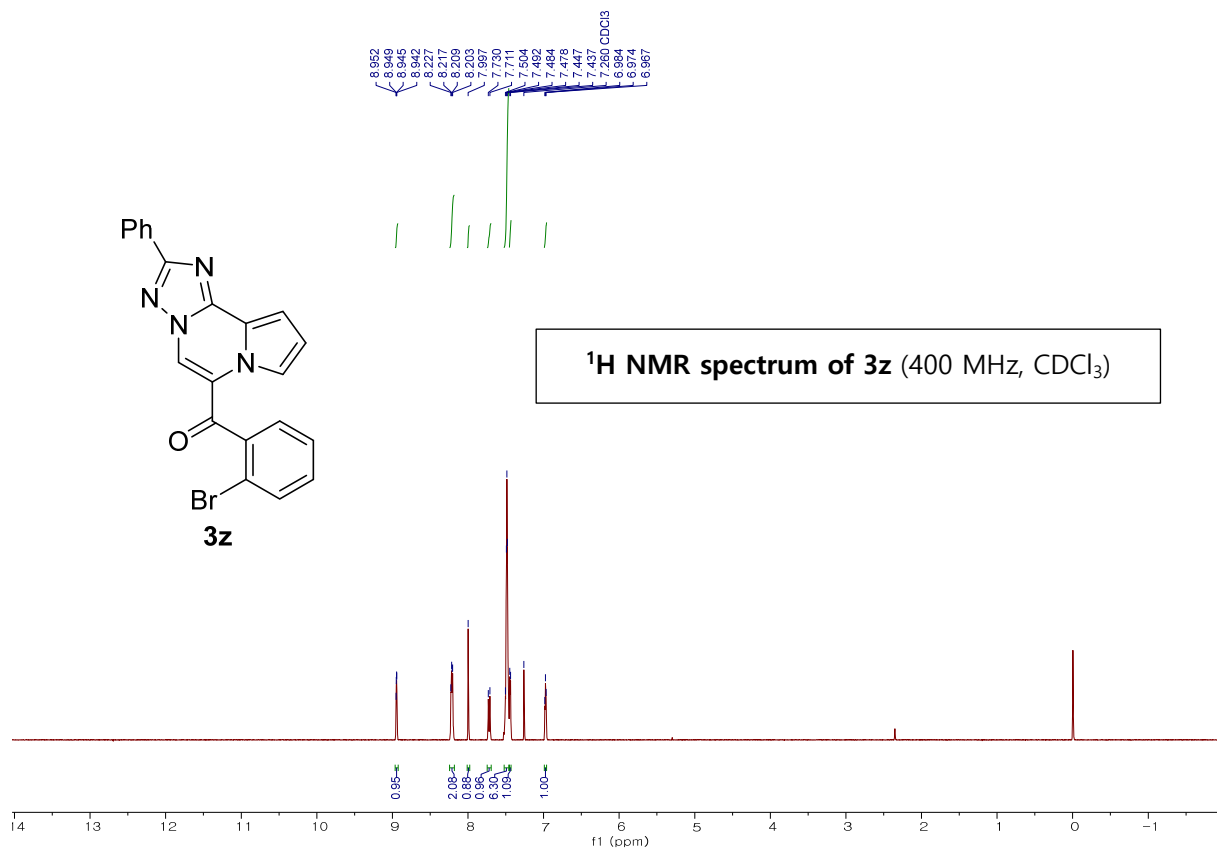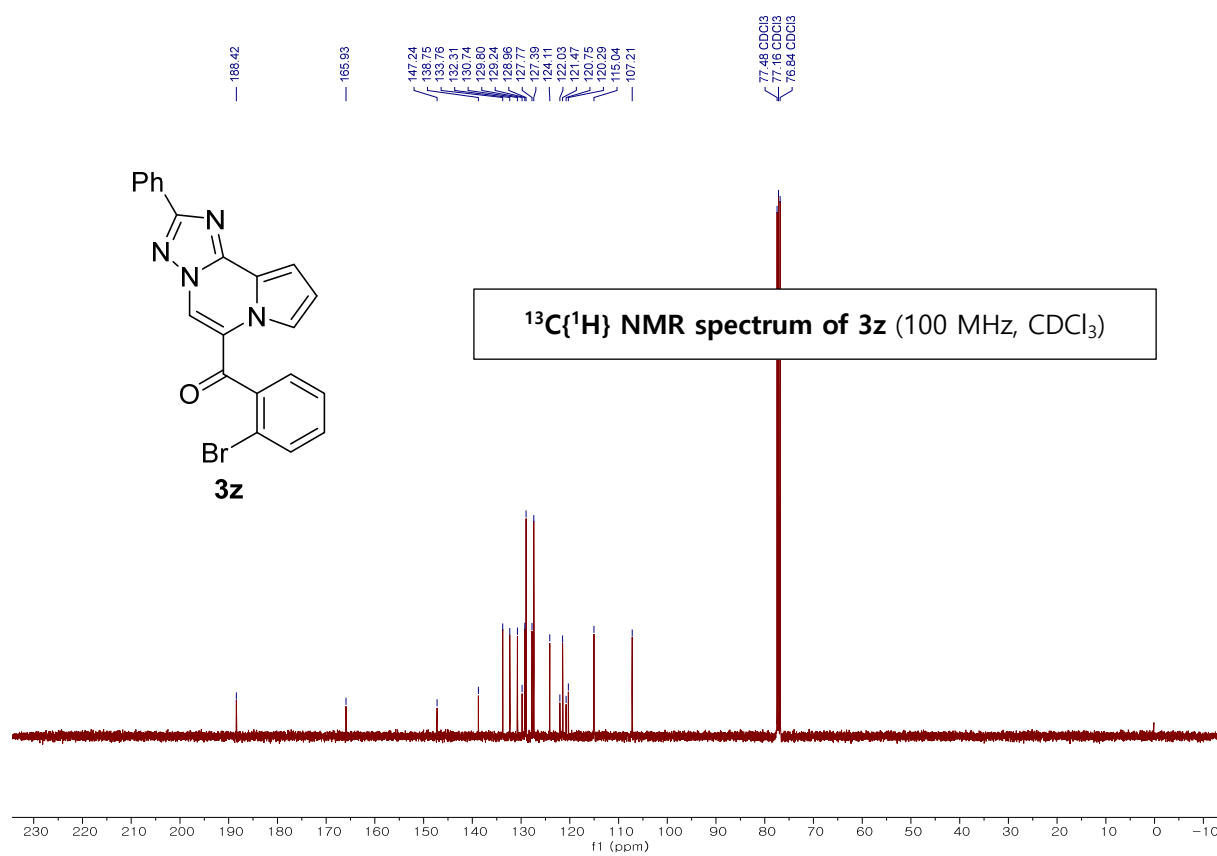

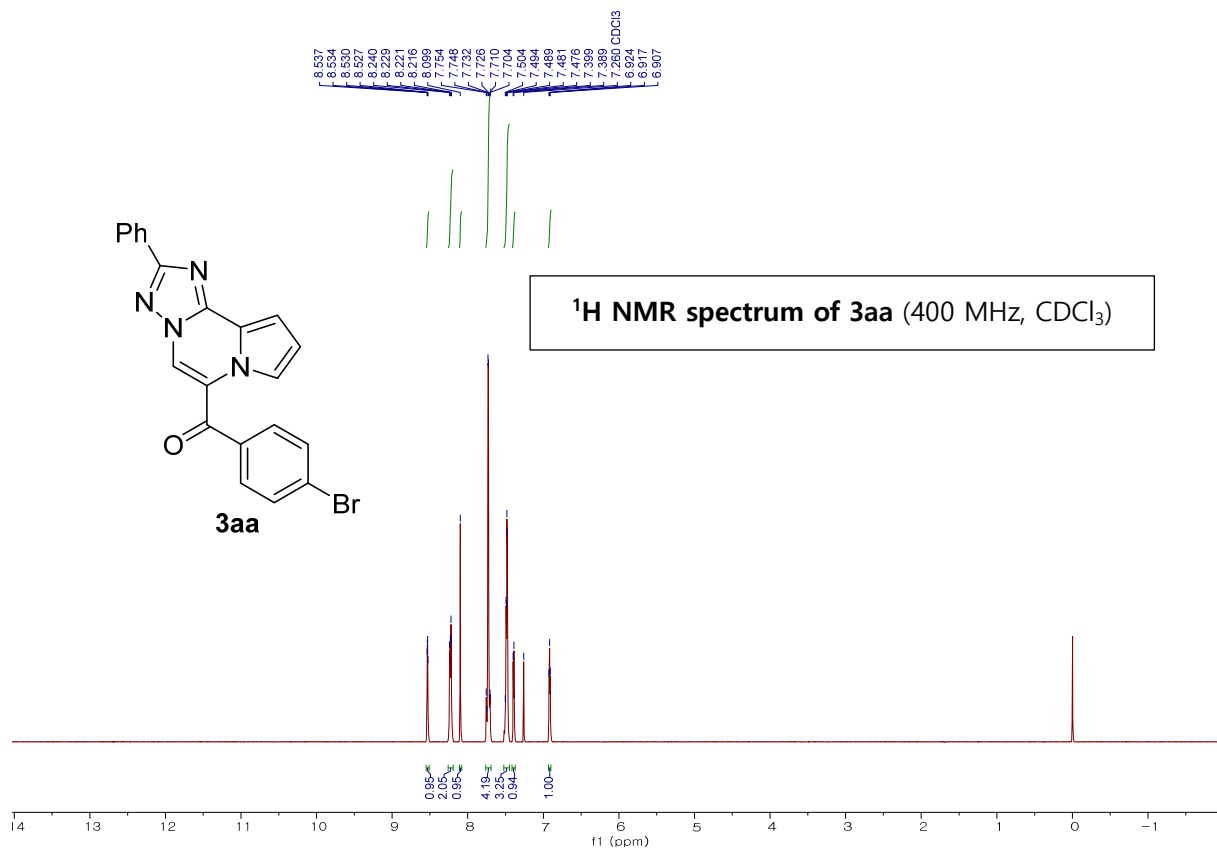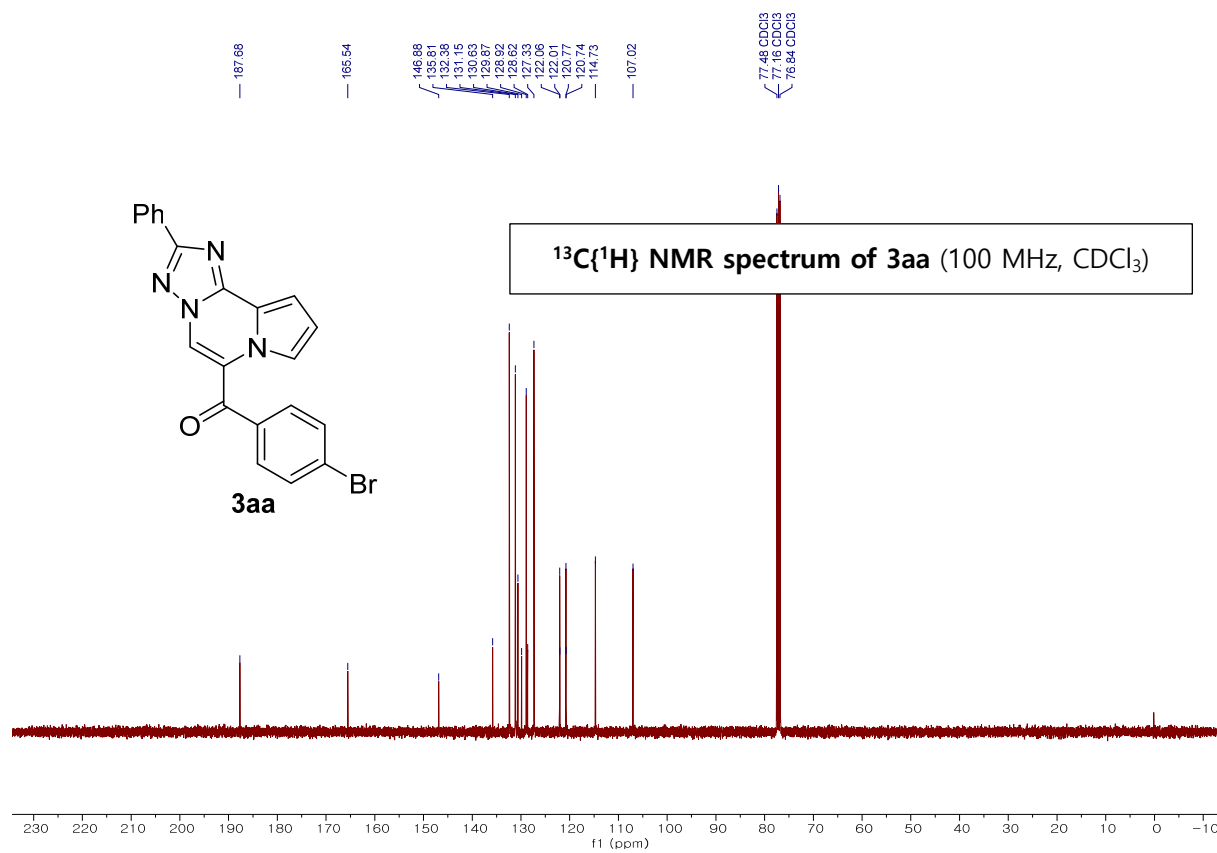

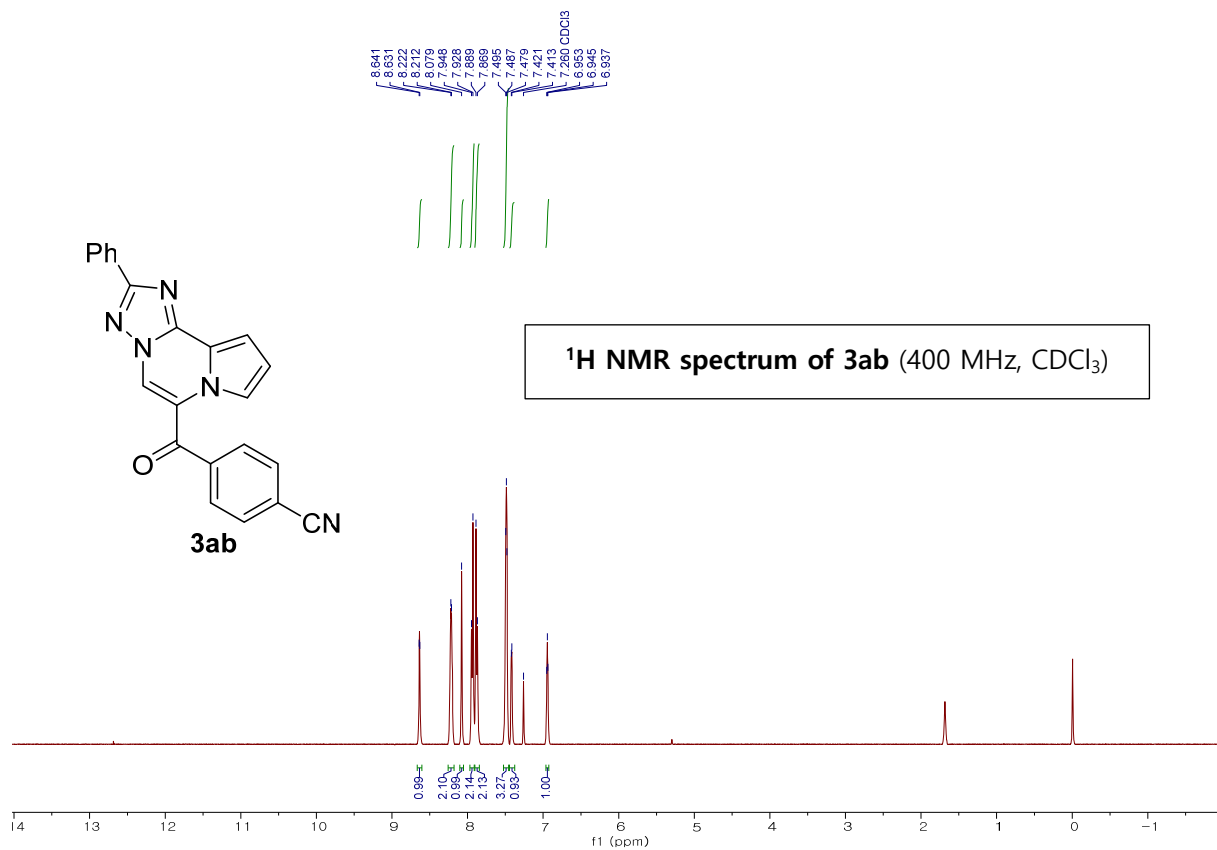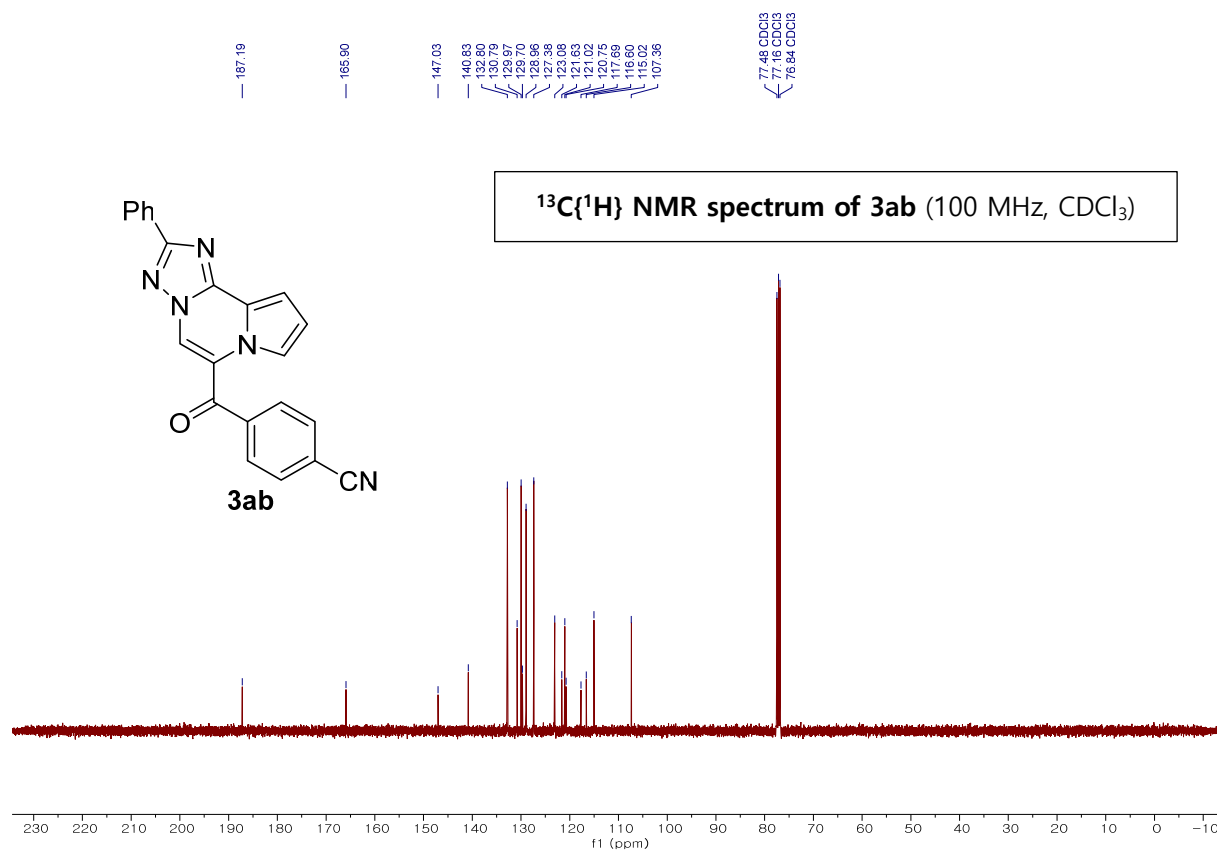



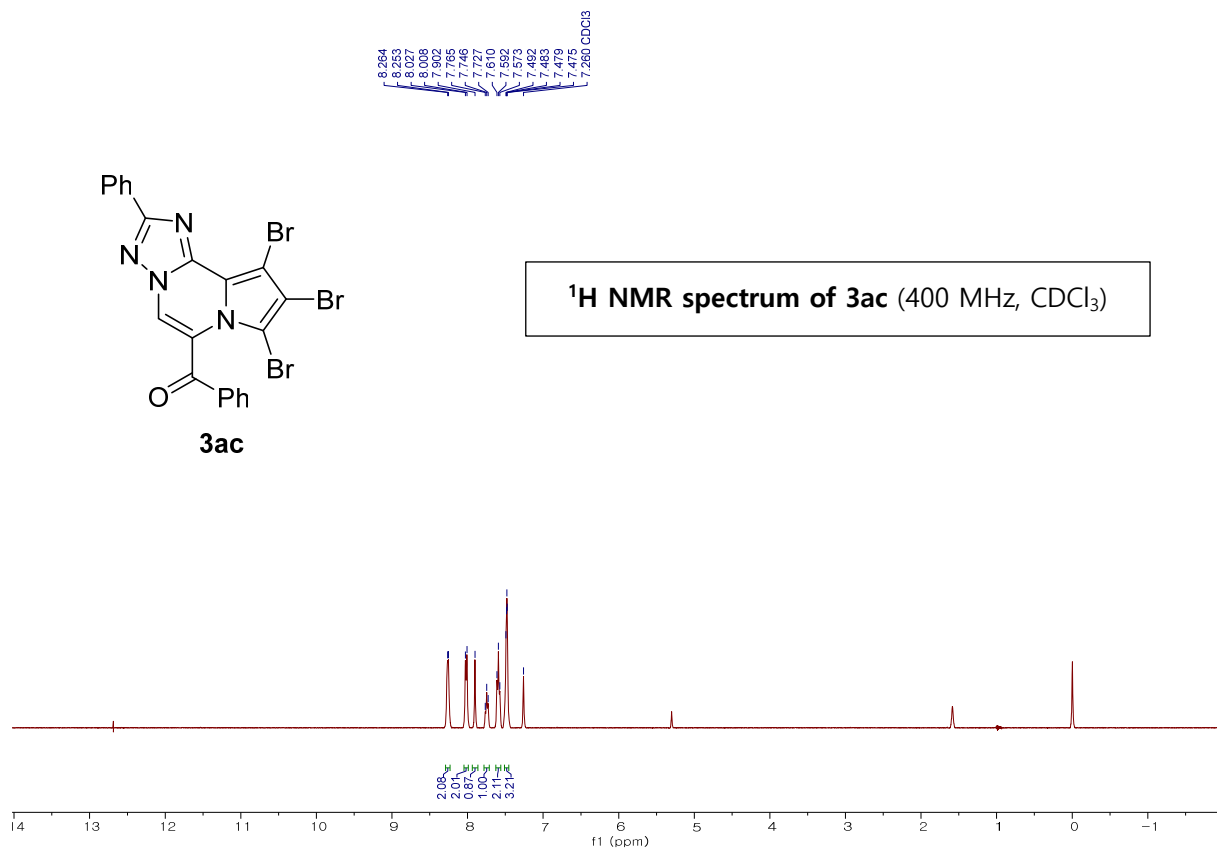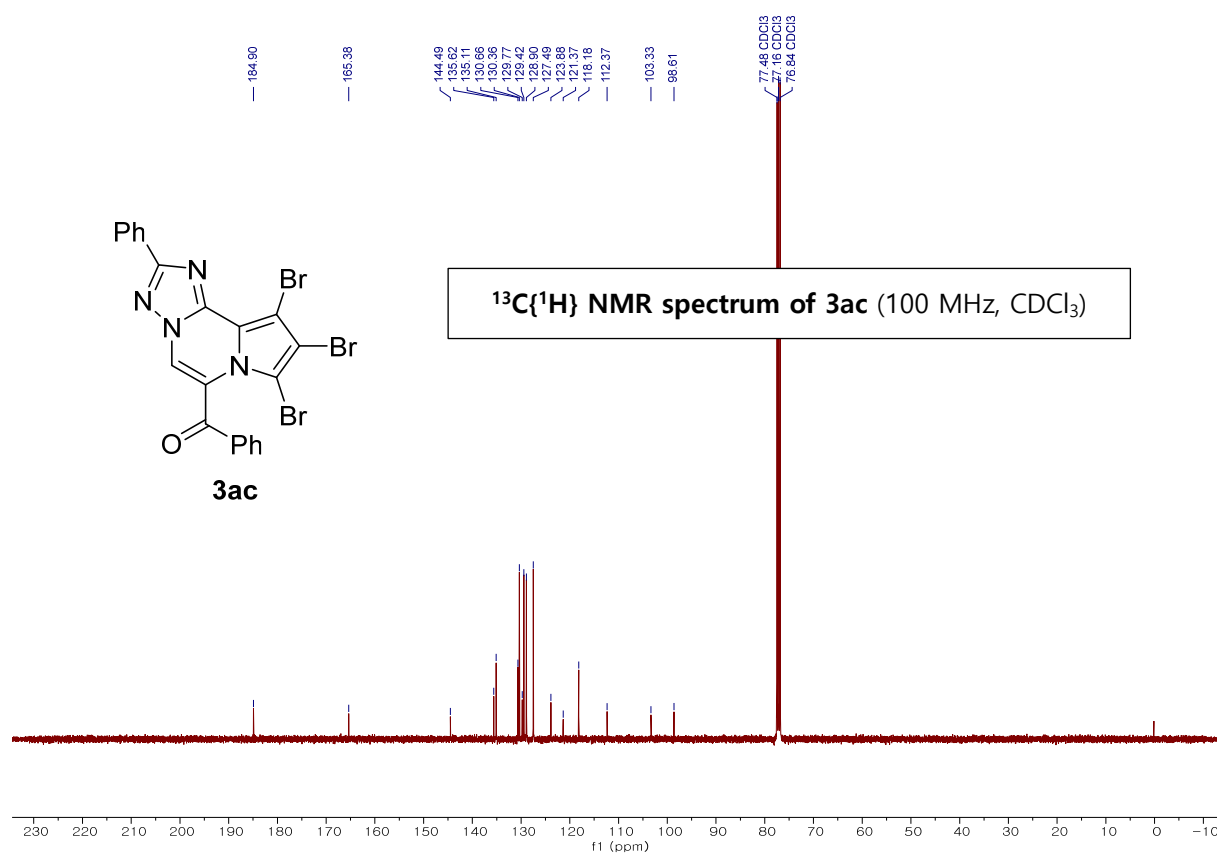

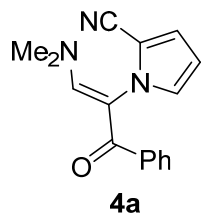

**<sup>1</sup>H NMR spectrum of 4a (400 MHz, CDCl<sub>3</sub>)**

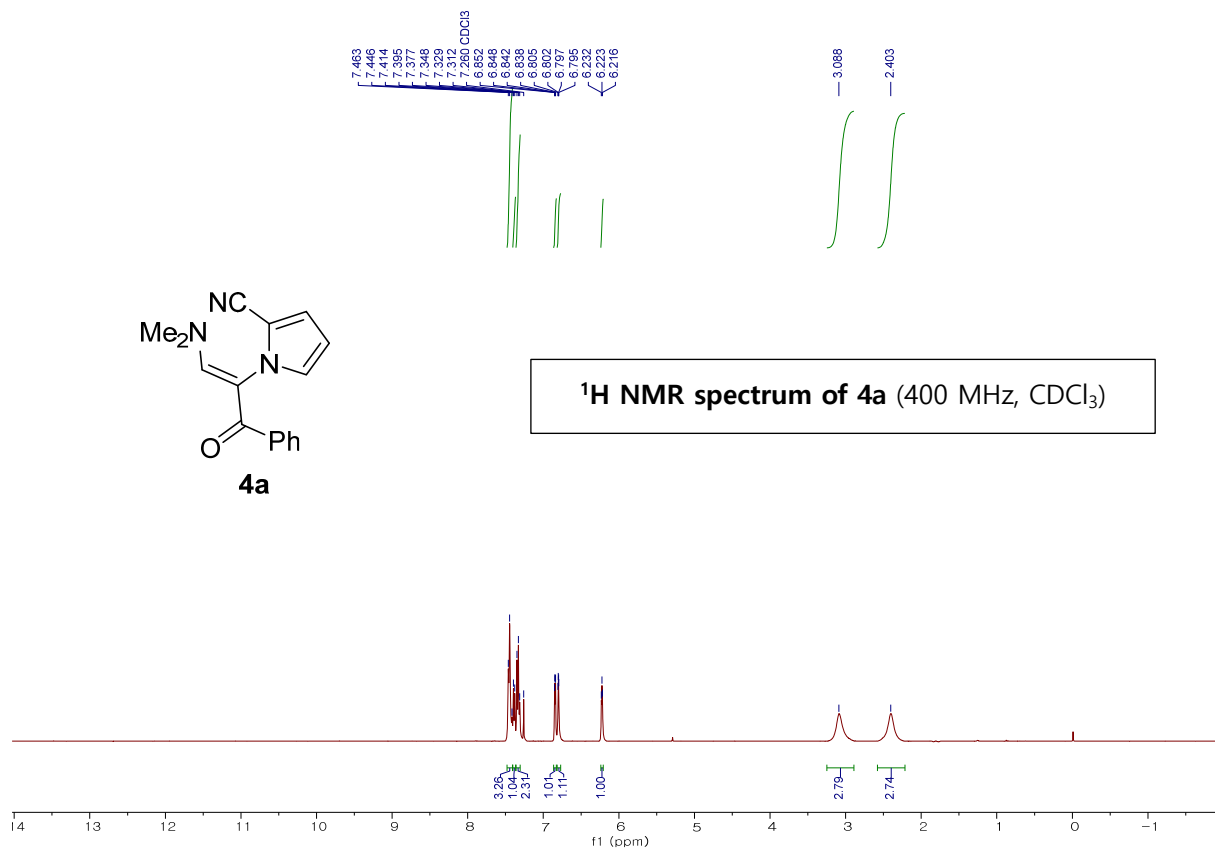

**<sup>13</sup>C{<sup>1</sup>H} NMR spectrum of 4a (100 MHz, CDCl<sub>3</sub>)**

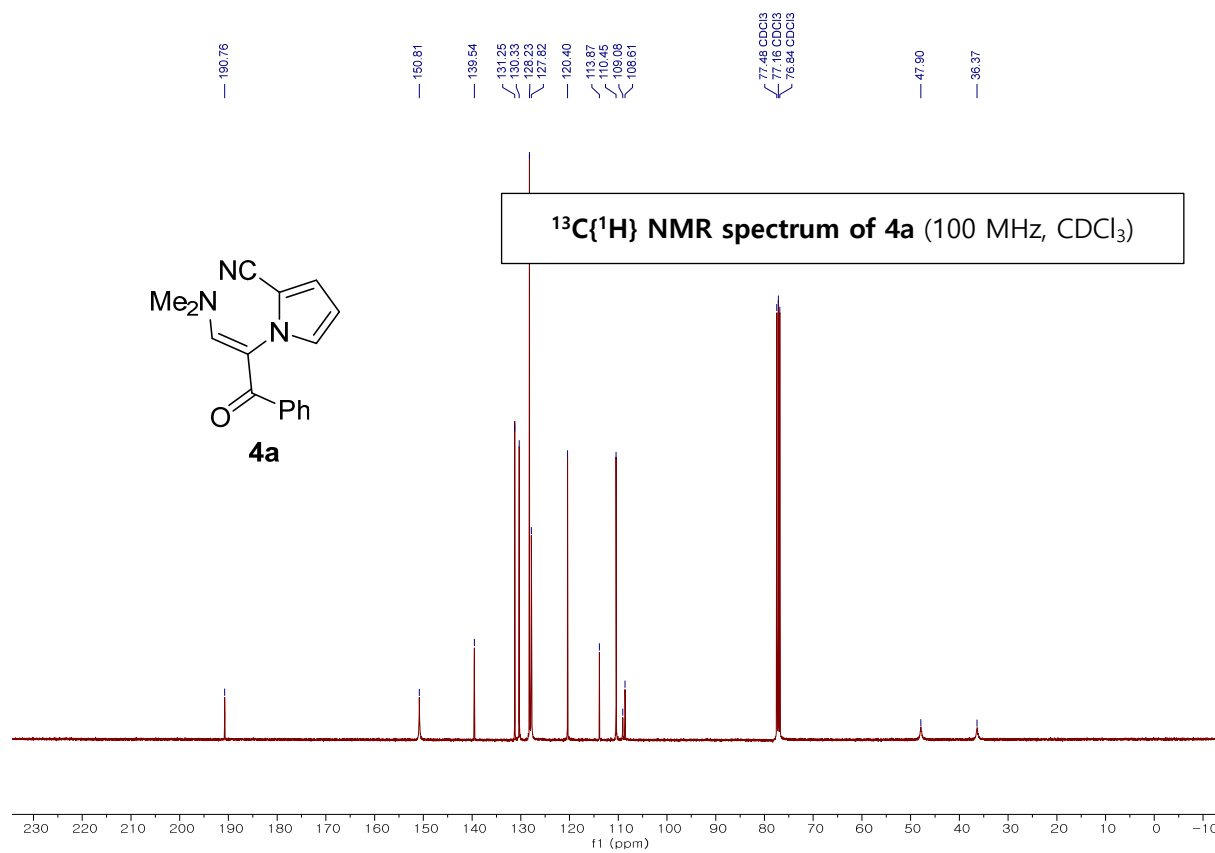

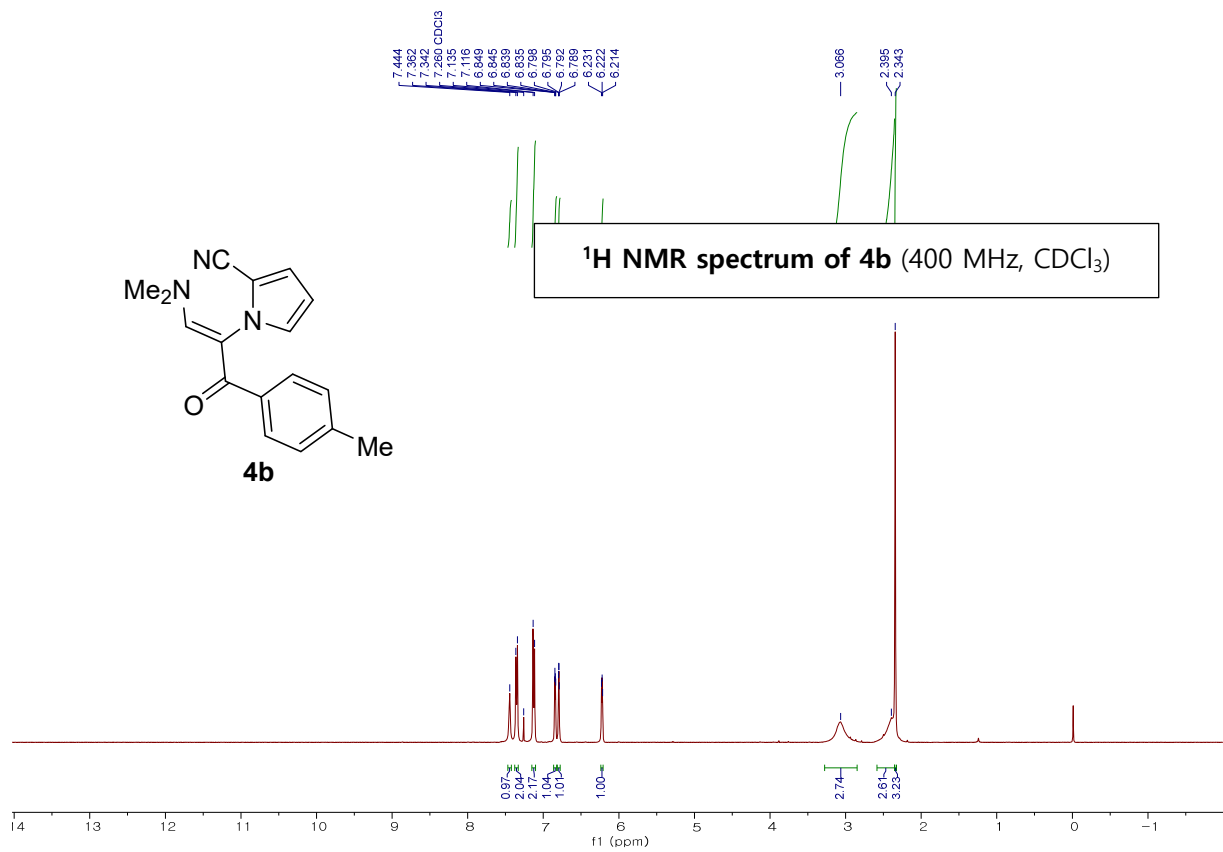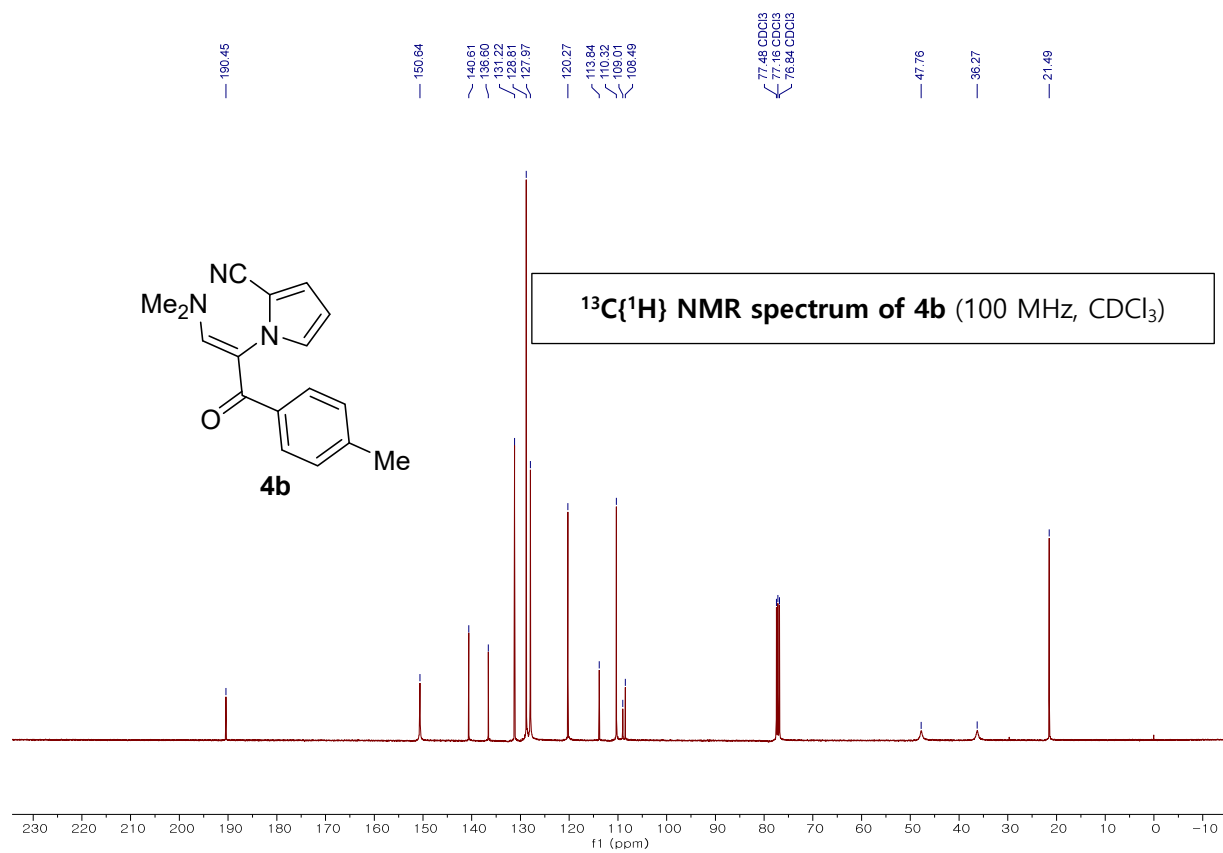

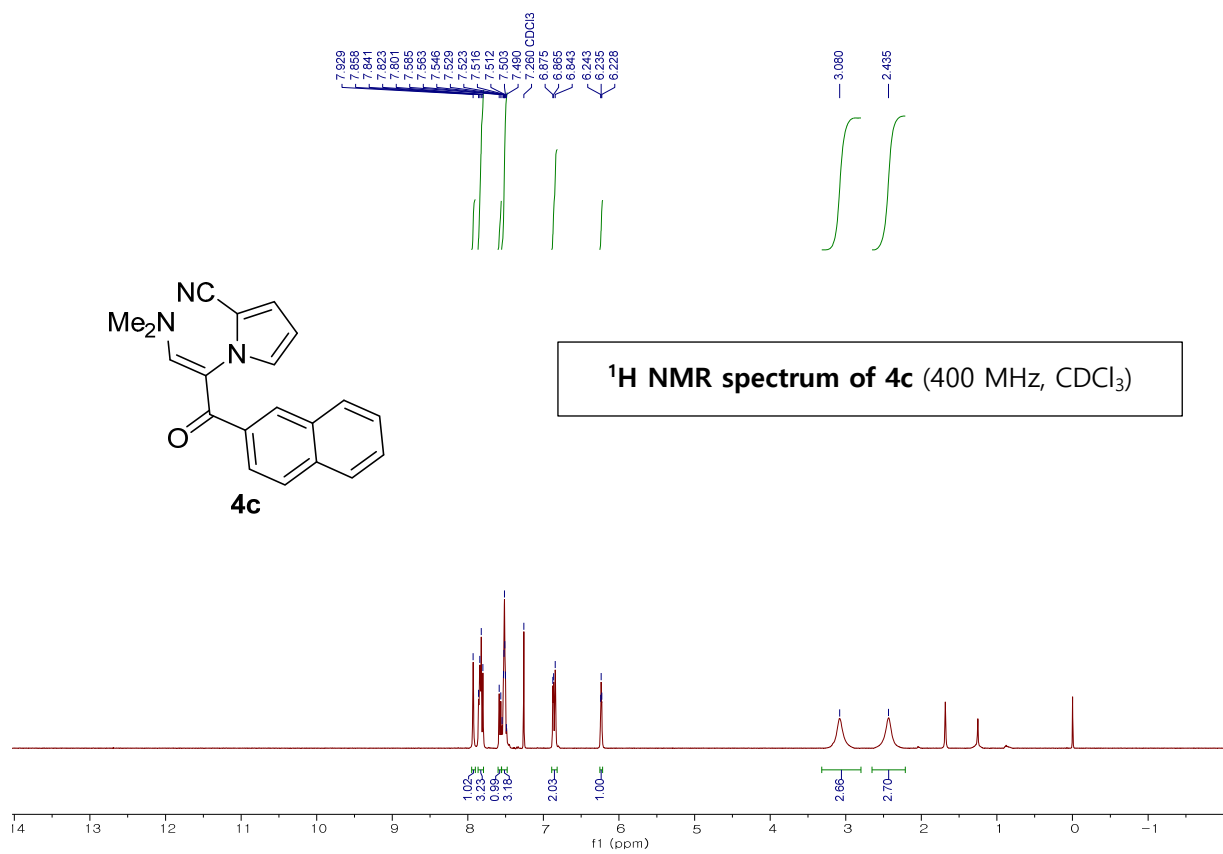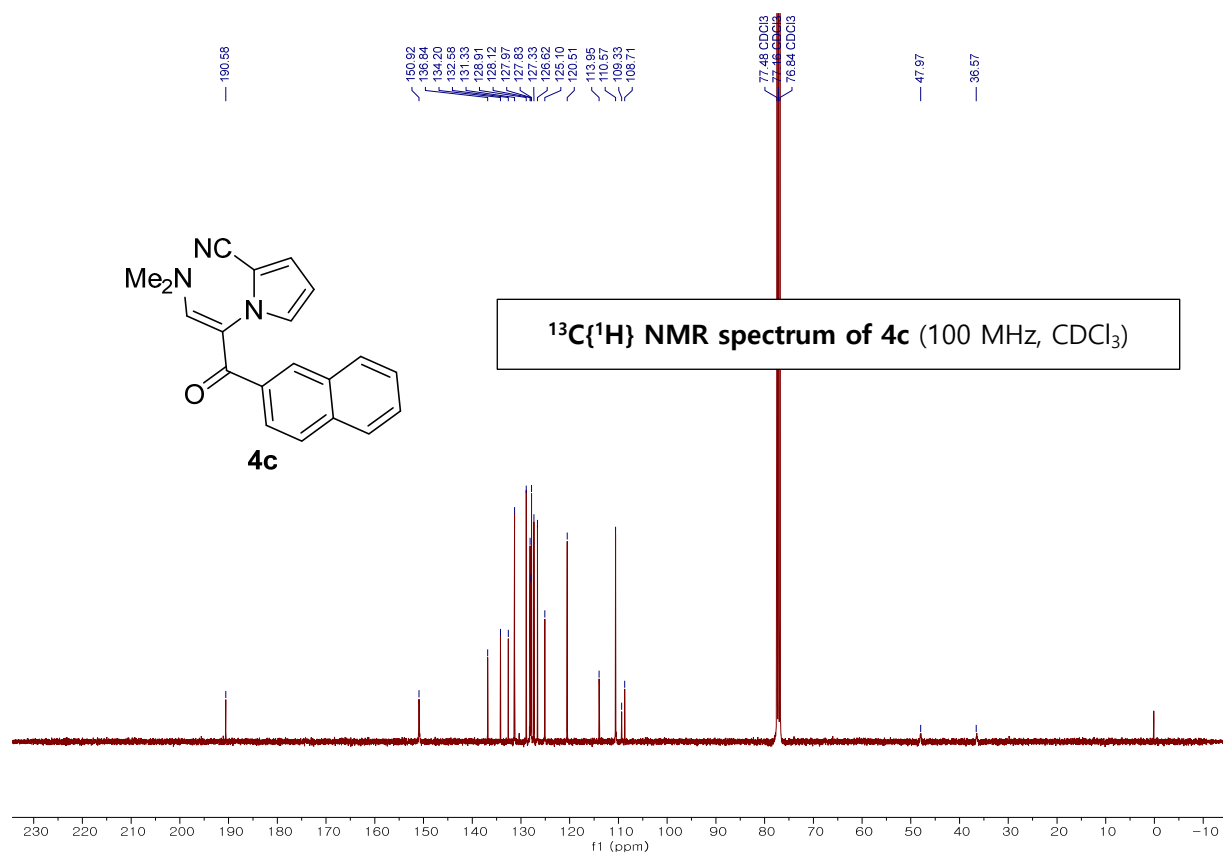

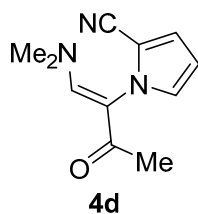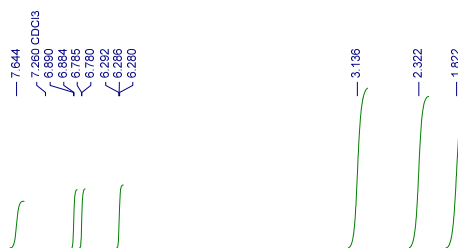

**$^1\text{H}$  NMR spectrum of 4d (400 MHz,  $\text{CDCl}_3$ )**

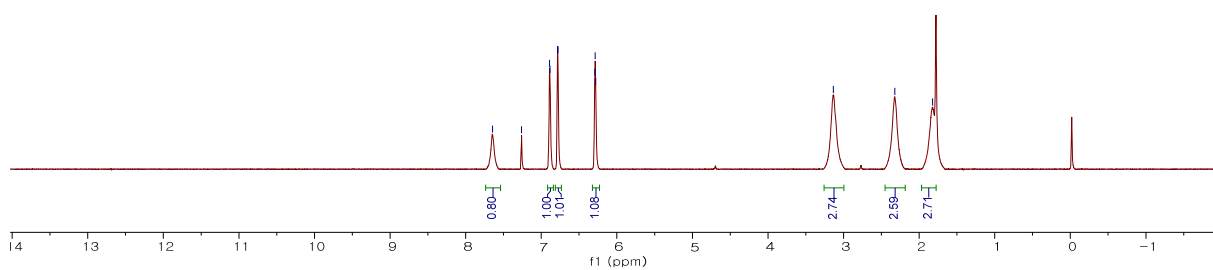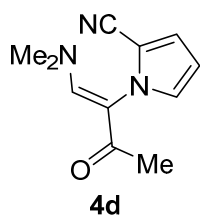

**$^{13}\text{C}\{^1\text{H}\}$  NMR spectrum of 4d (100 MHz,  $\text{CDCl}_3$ )**

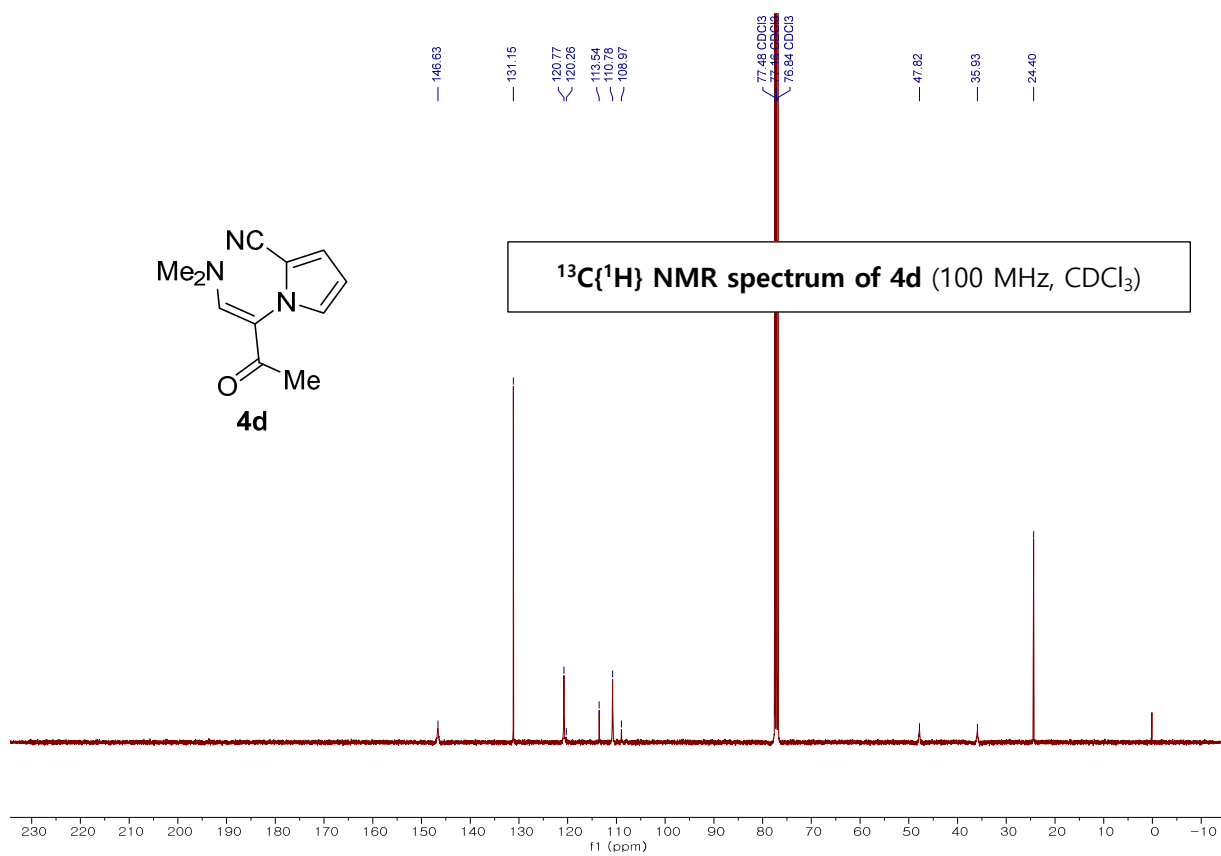

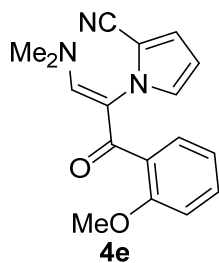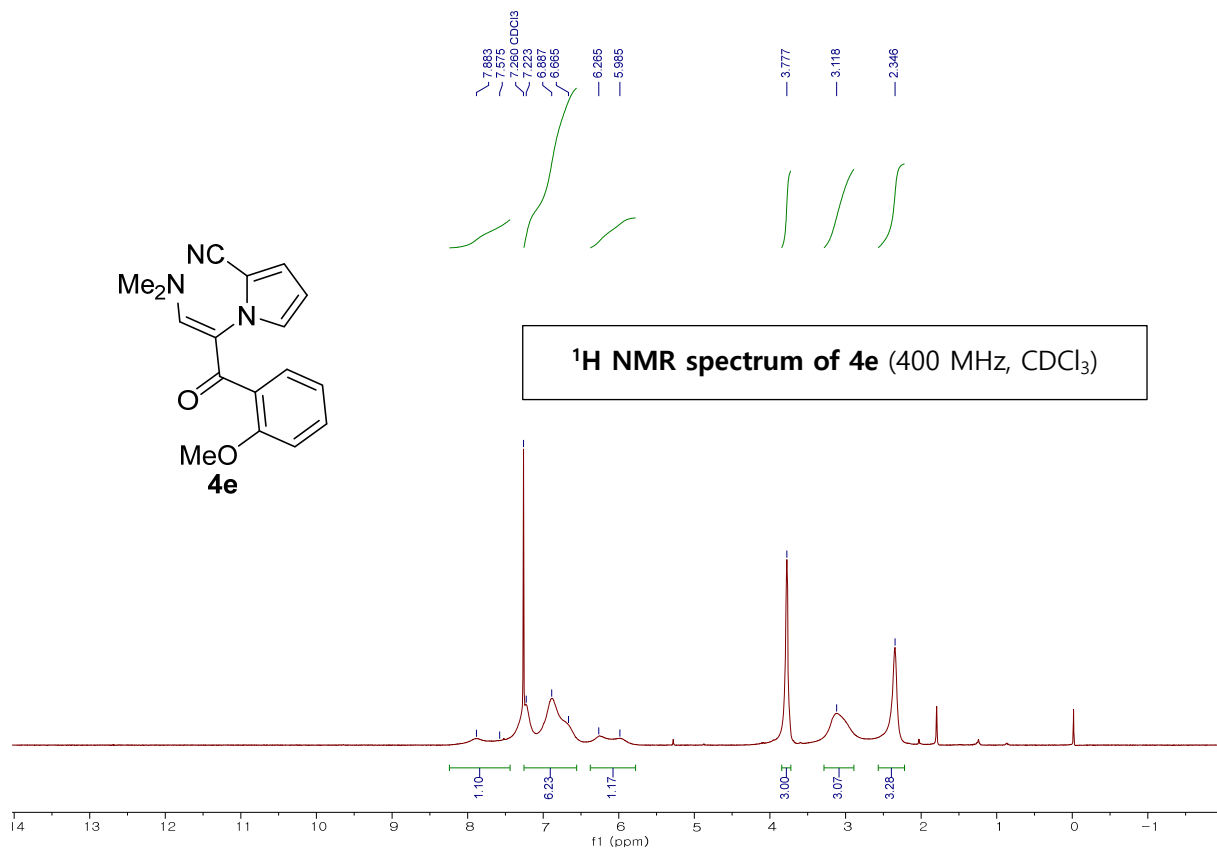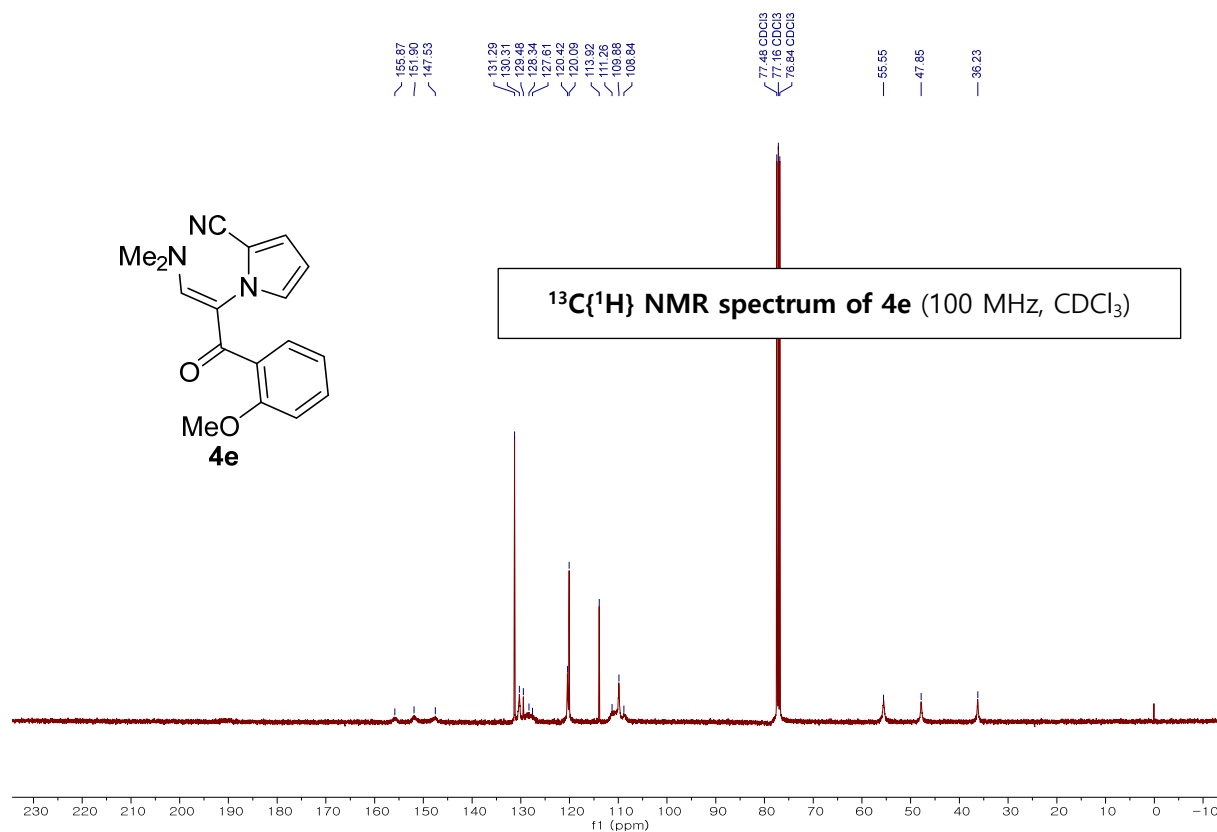

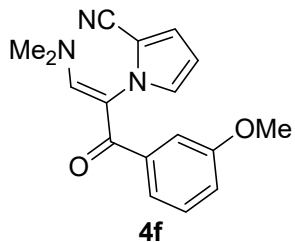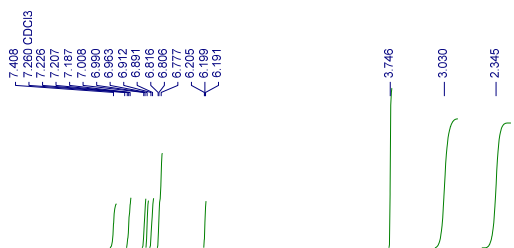

**<sup>1</sup>H NMR spectrum of 4f (400 MHz, CDCl<sub>3</sub>)**

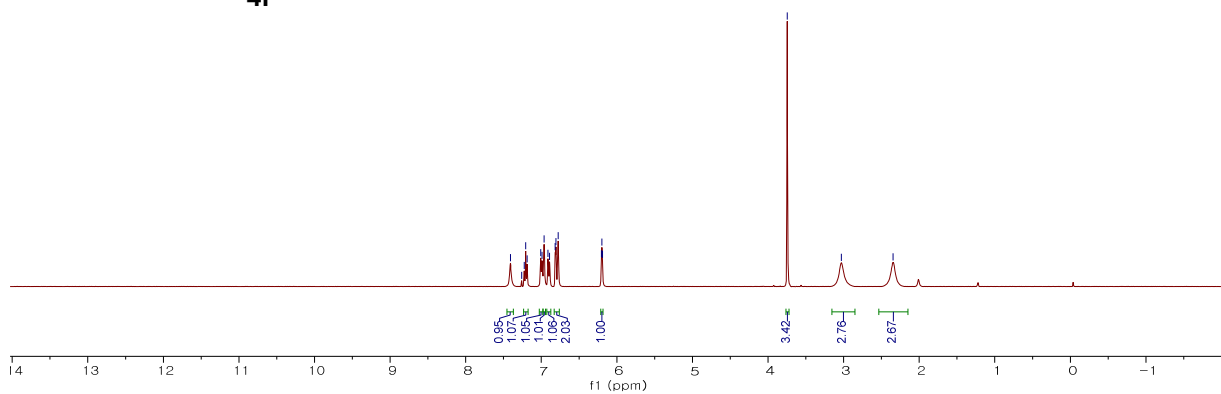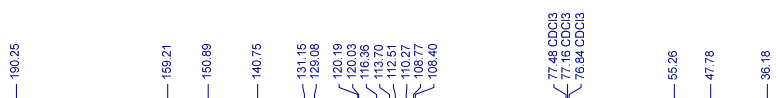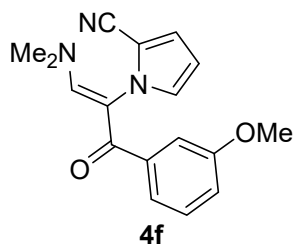

**<sup>13</sup>C{<sup>1</sup>H} NMR spectrum of 4f (100 MHz, CDCl<sub>3</sub>)**

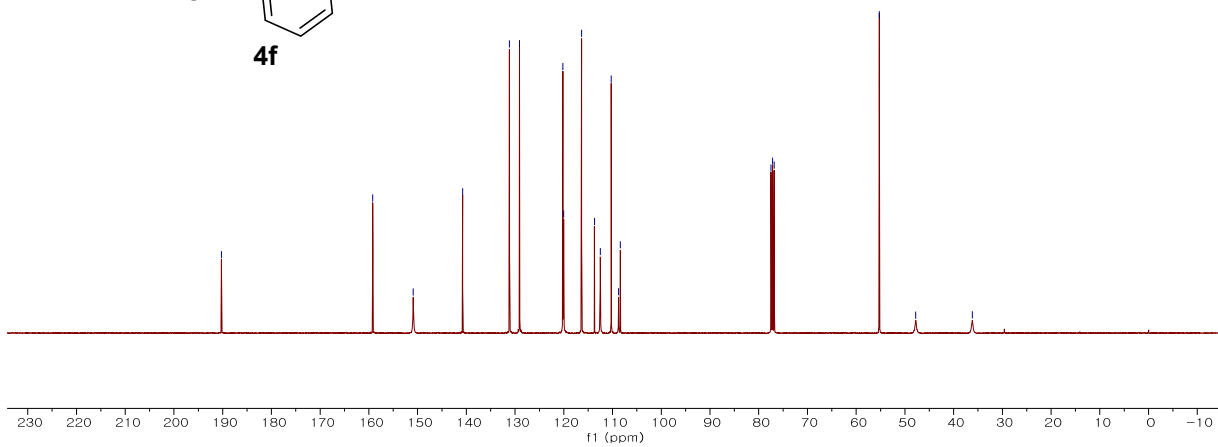

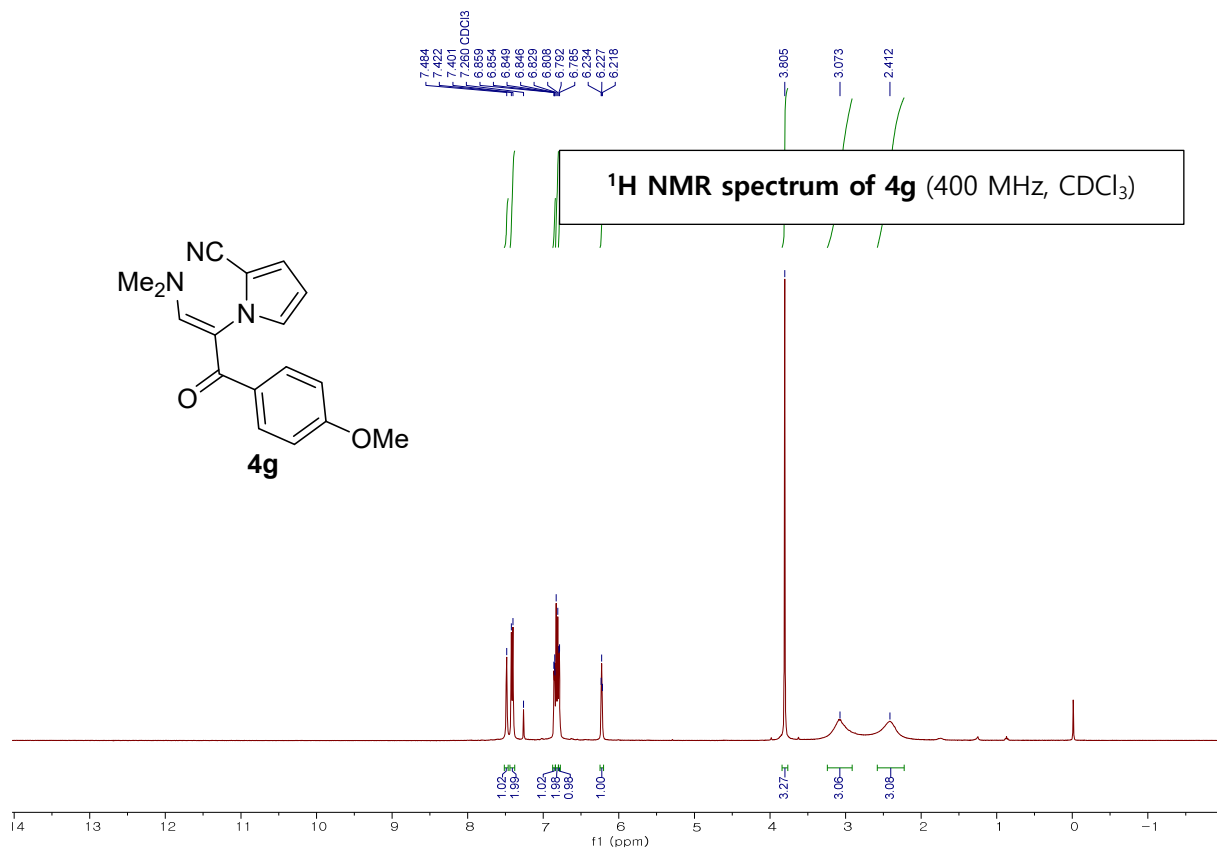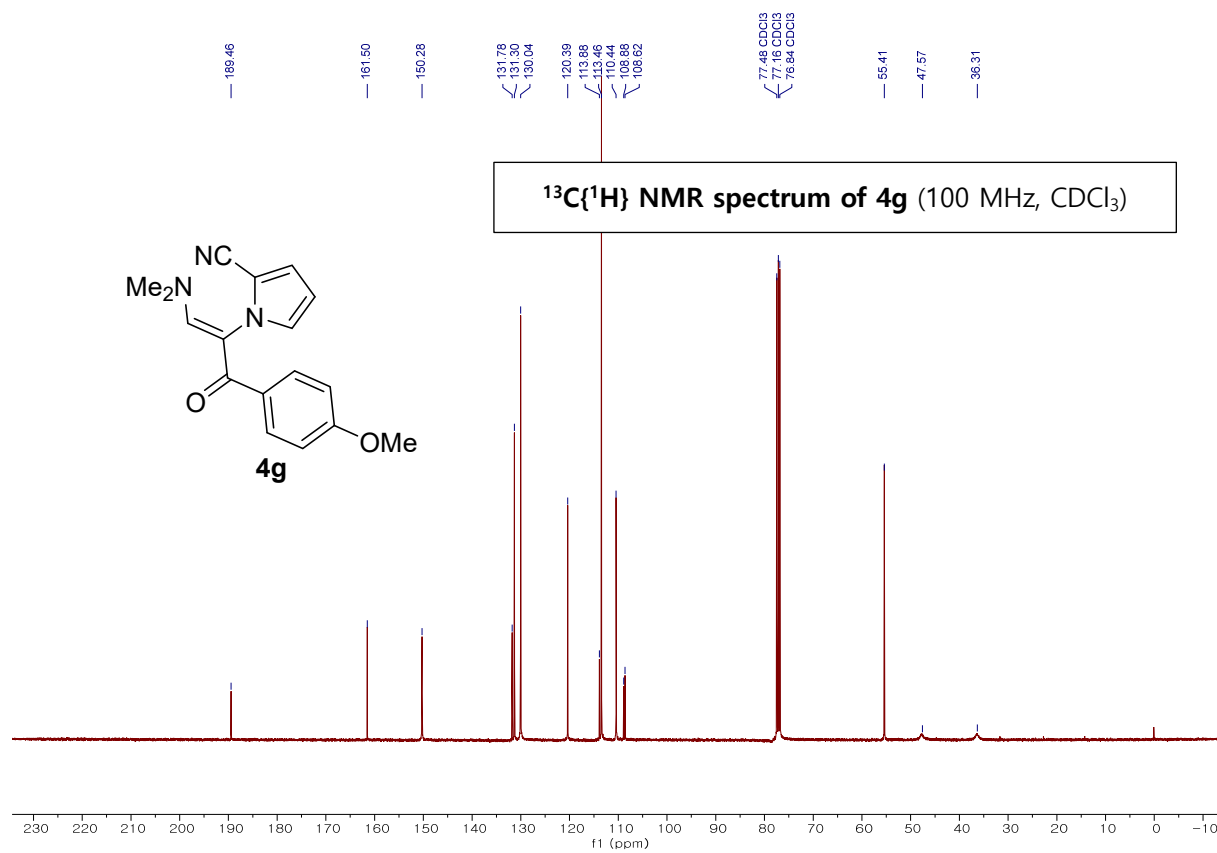



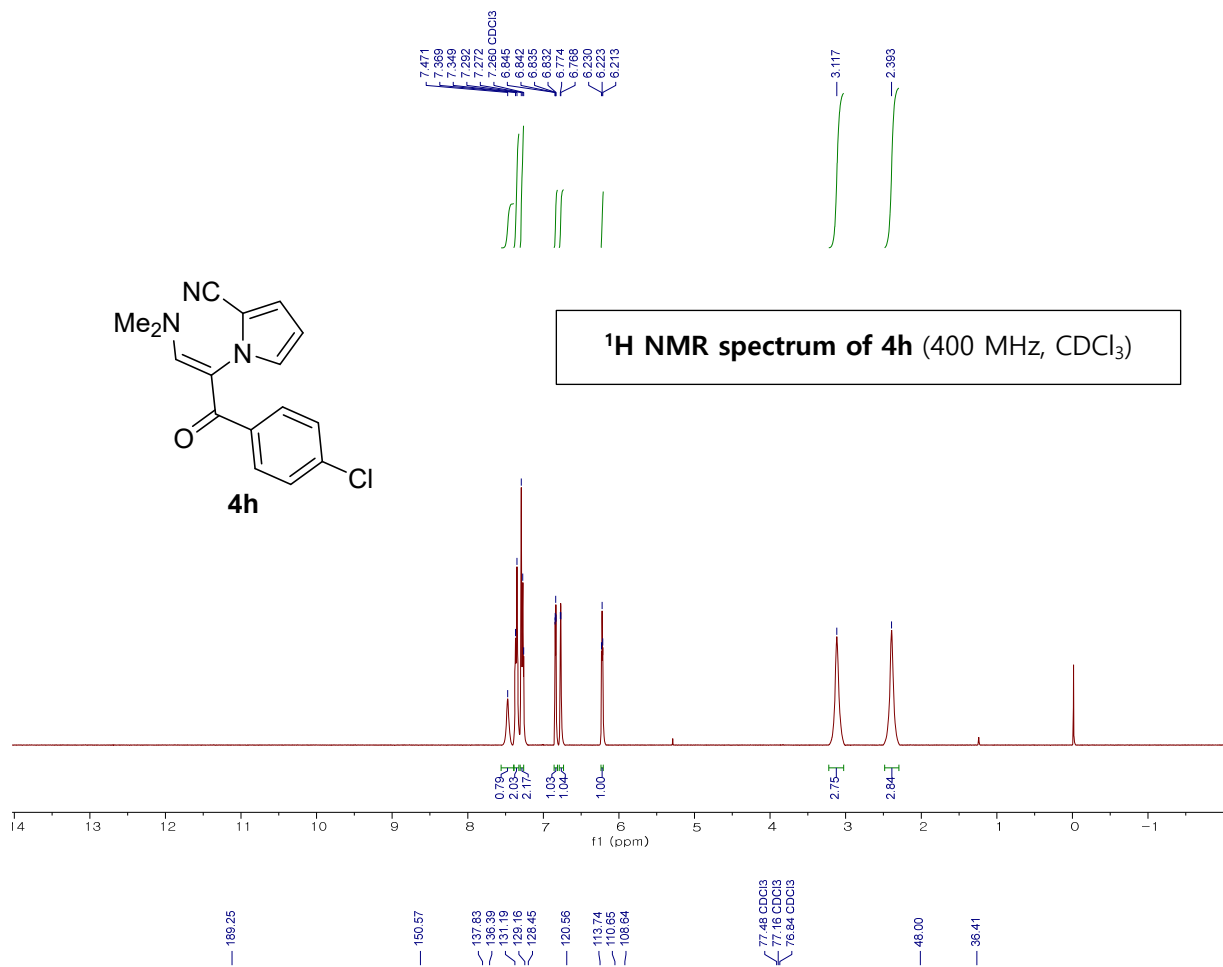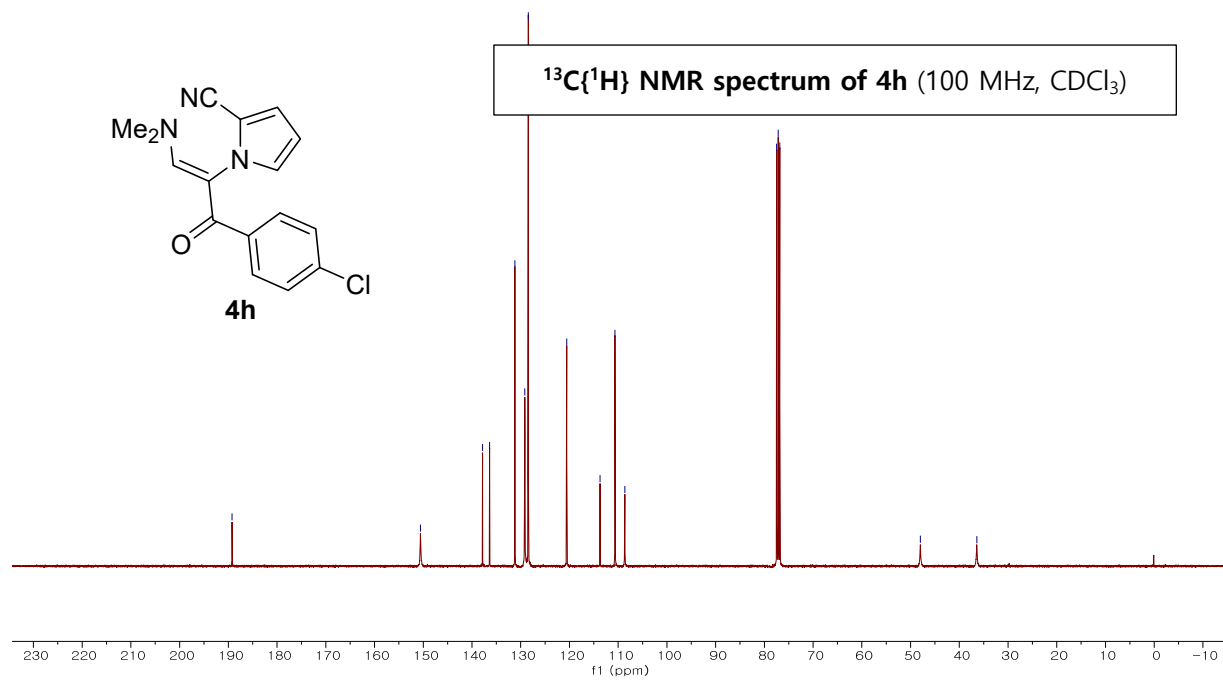

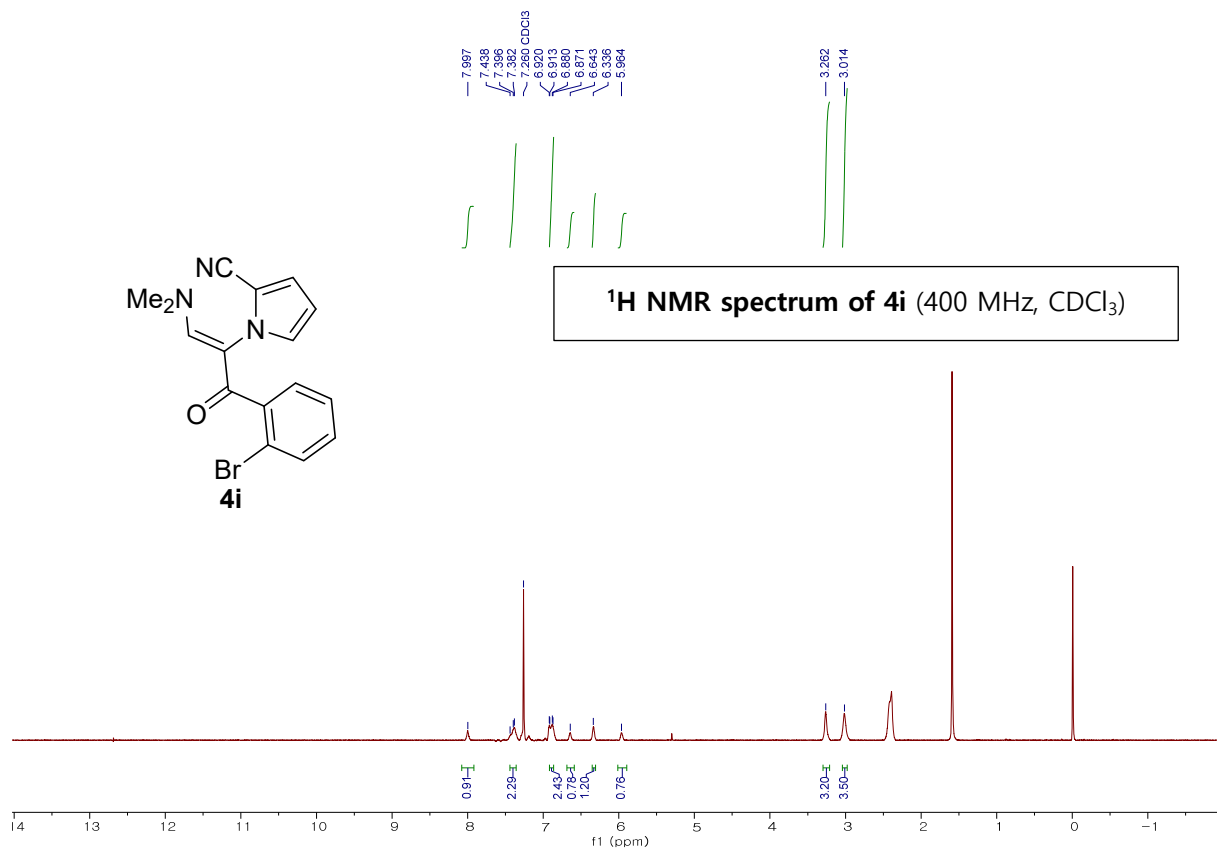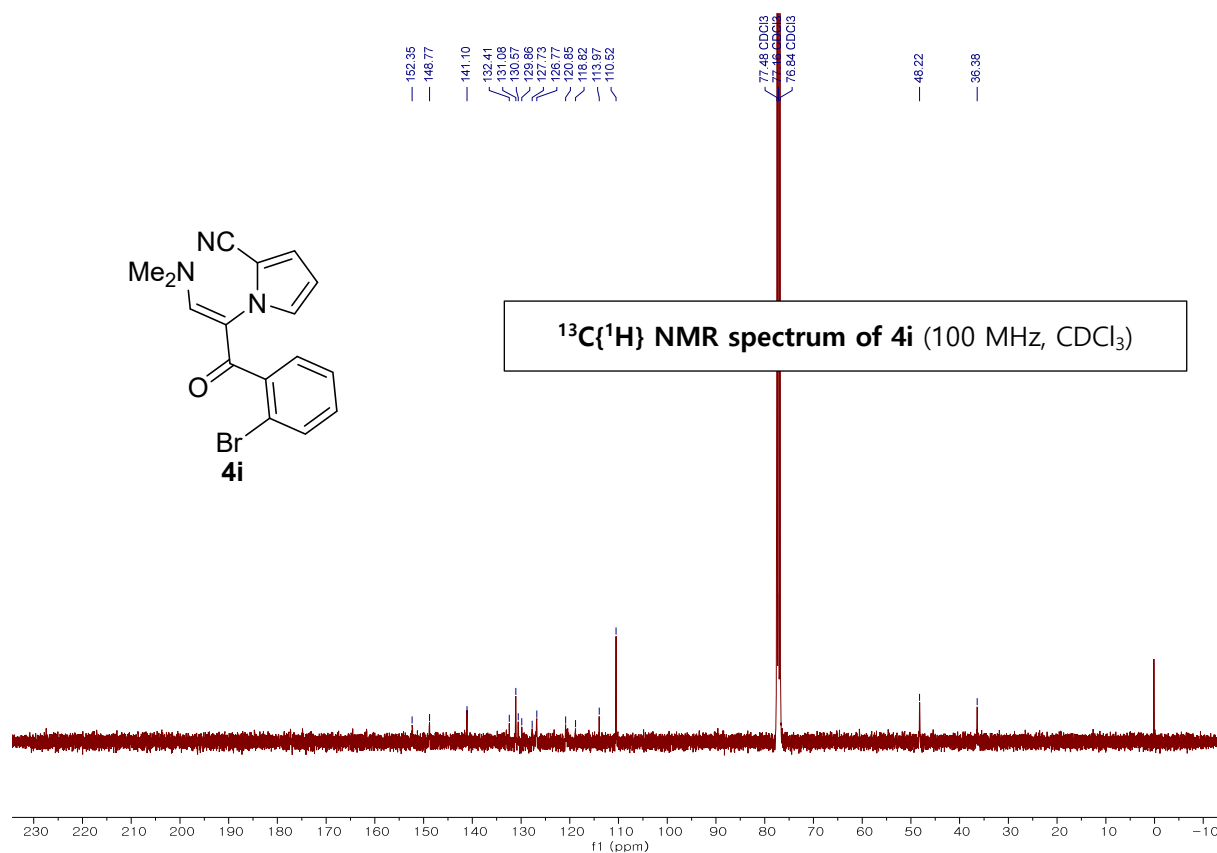

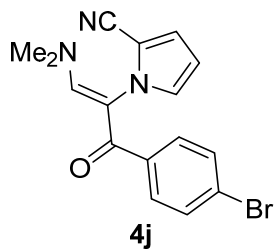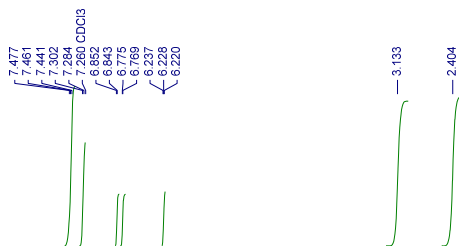

**<sup>1</sup>H NMR spectrum of 4j (400 MHz, CDCl<sub>3</sub>)**

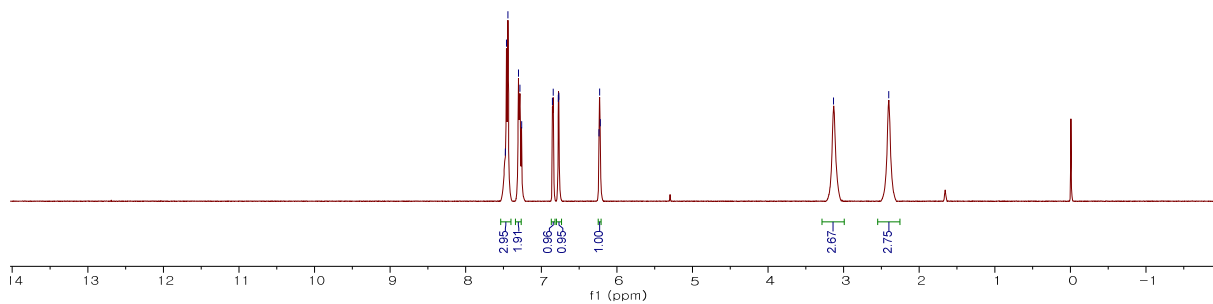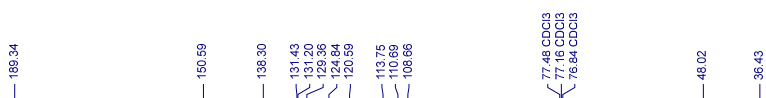

**<sup>13</sup>C{<sup>1</sup>H} NMR spectrum of 4j (100 MHz, CDCl<sub>3</sub>)**

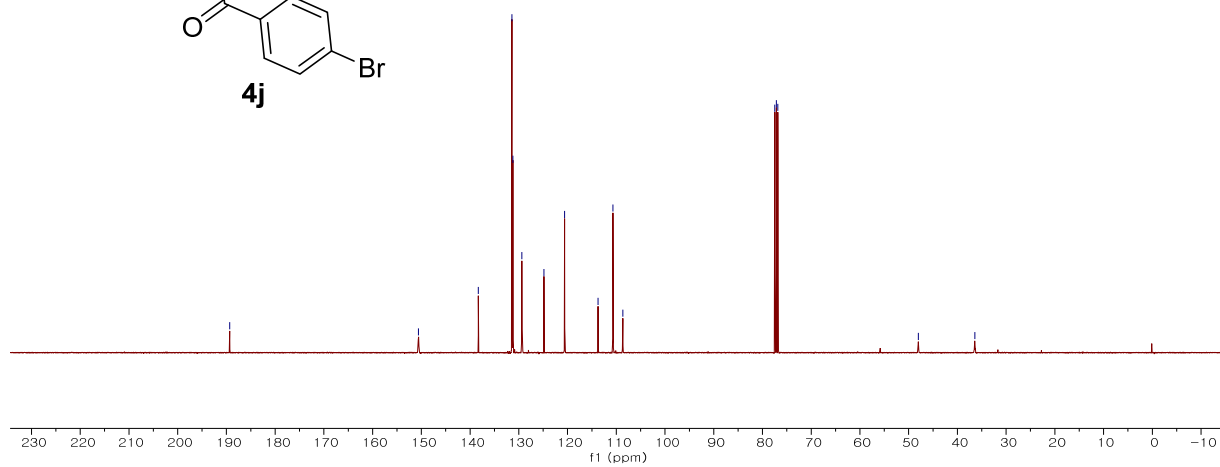

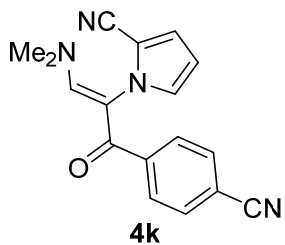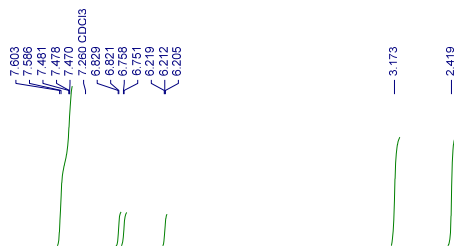

**<sup>1</sup>H NMR spectrum of 4k (400 MHz, CDCl<sub>3</sub>)**

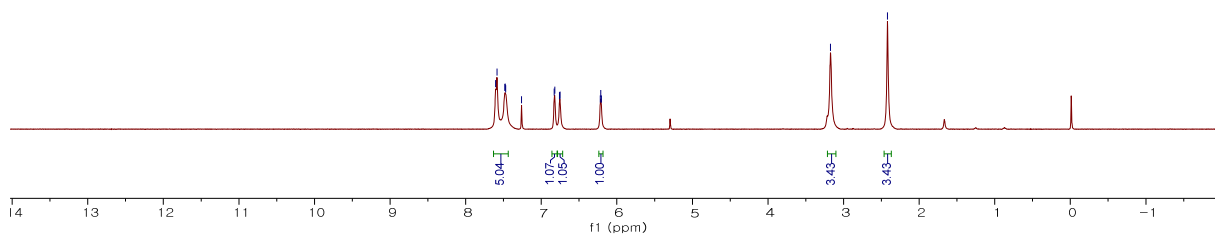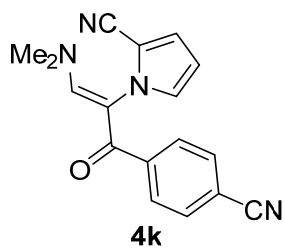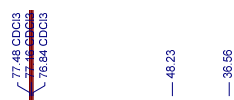

**<sup>13</sup>C{<sup>1</sup>H} NMR spectrum of 4k (100 MHz, CDCl<sub>3</sub>)**

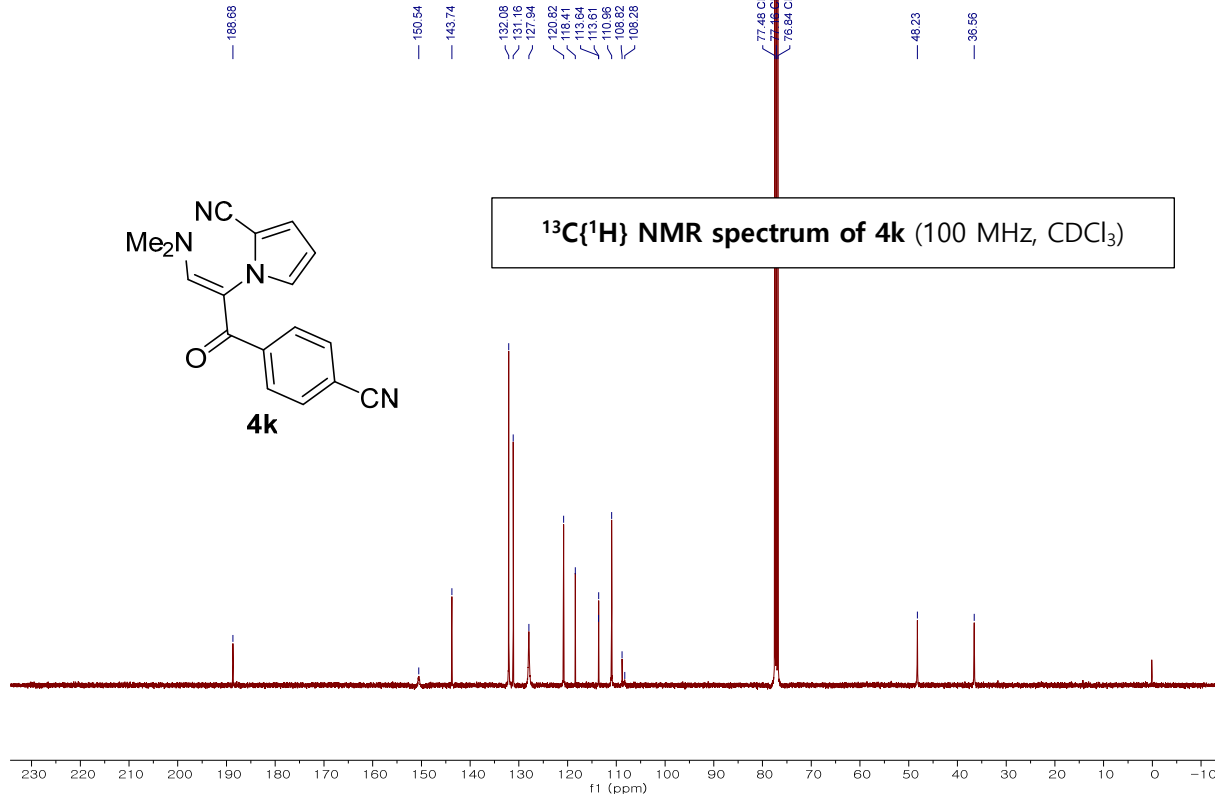

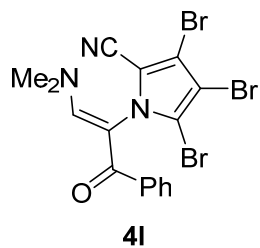

7.543  
7.537  
7.477  
7.466  
7.432  
7.411  
7.392  
7.322  
7.260 CDCl<sub>3</sub>

3.099  
2.553

**<sup>1</sup>H NMR spectrum of 4I (400 MHz, CDCl<sub>3</sub>)**

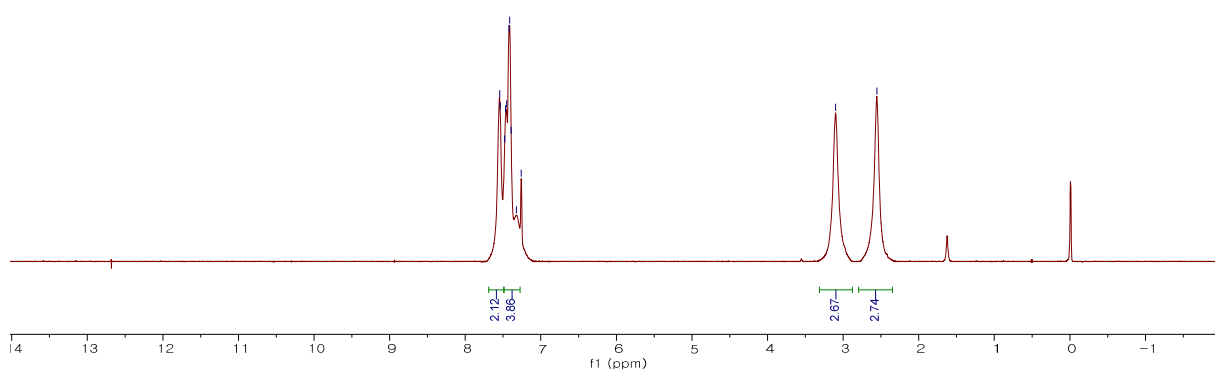

189.83

152.02

138.94

130.85

128.50

128.26

115.93

111.92

110.84

110.31

108.44

103.74

77.48 CDCl<sub>3</sub>  
77.16 CDCl<sub>3</sub>  
76.84 CDCl<sub>3</sub>

46.15

37.27

**<sup>13</sup>C{<sup>1</sup>H} NMR spectrum of 4I (100 MHz, CDCl<sub>3</sub>)**

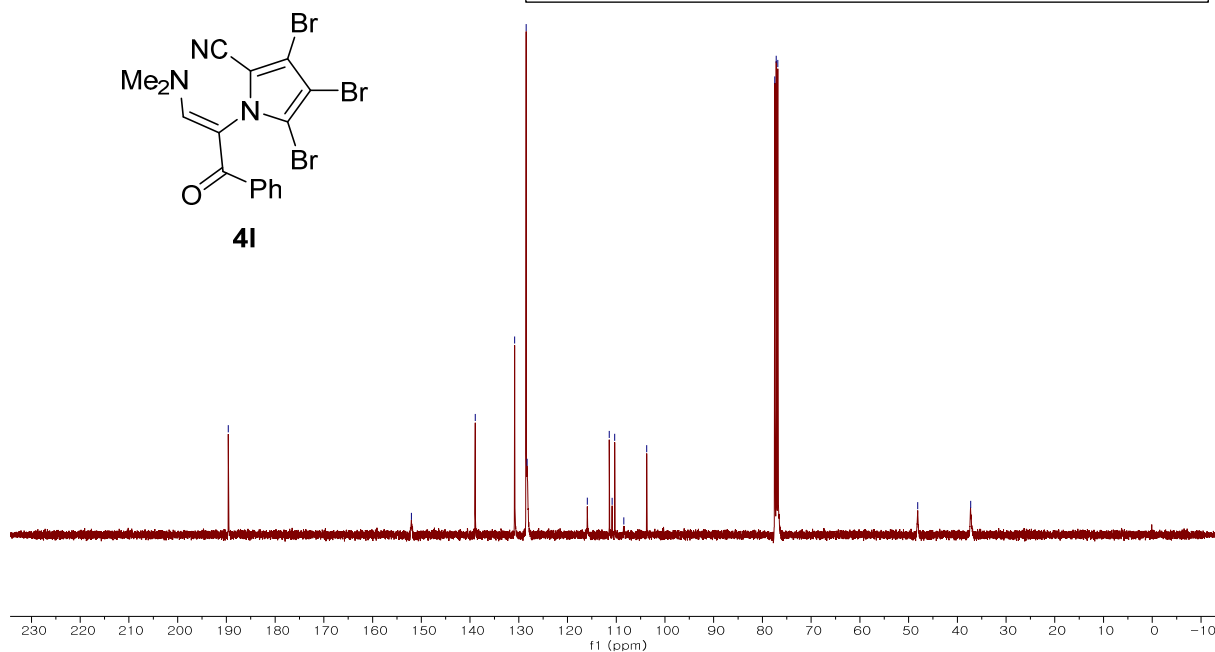

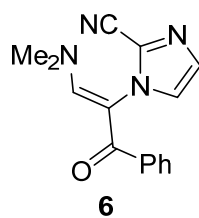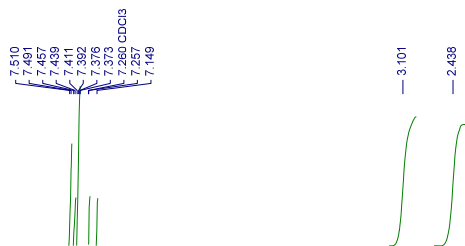

**<sup>1</sup>H NMR spectrum of 6 (400 MHz, CDCl<sub>3</sub>)**

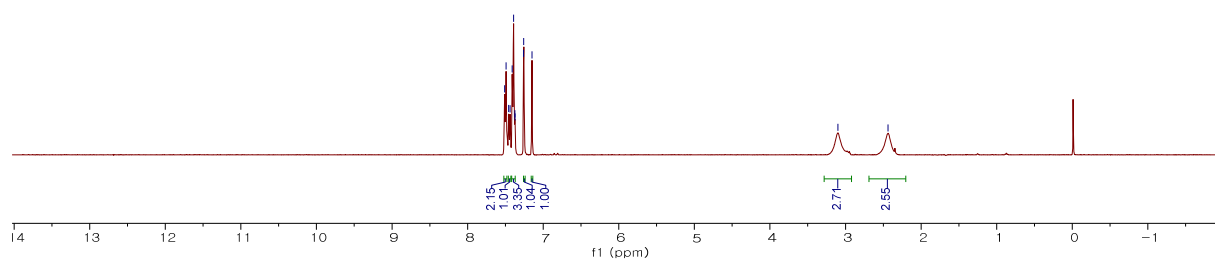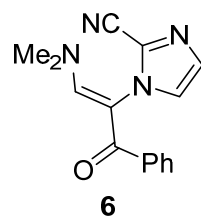

**<sup>13</sup>C{<sup>1</sup>H} NMR spectrum of 6 (100 MHz, CDCl<sub>3</sub>)**

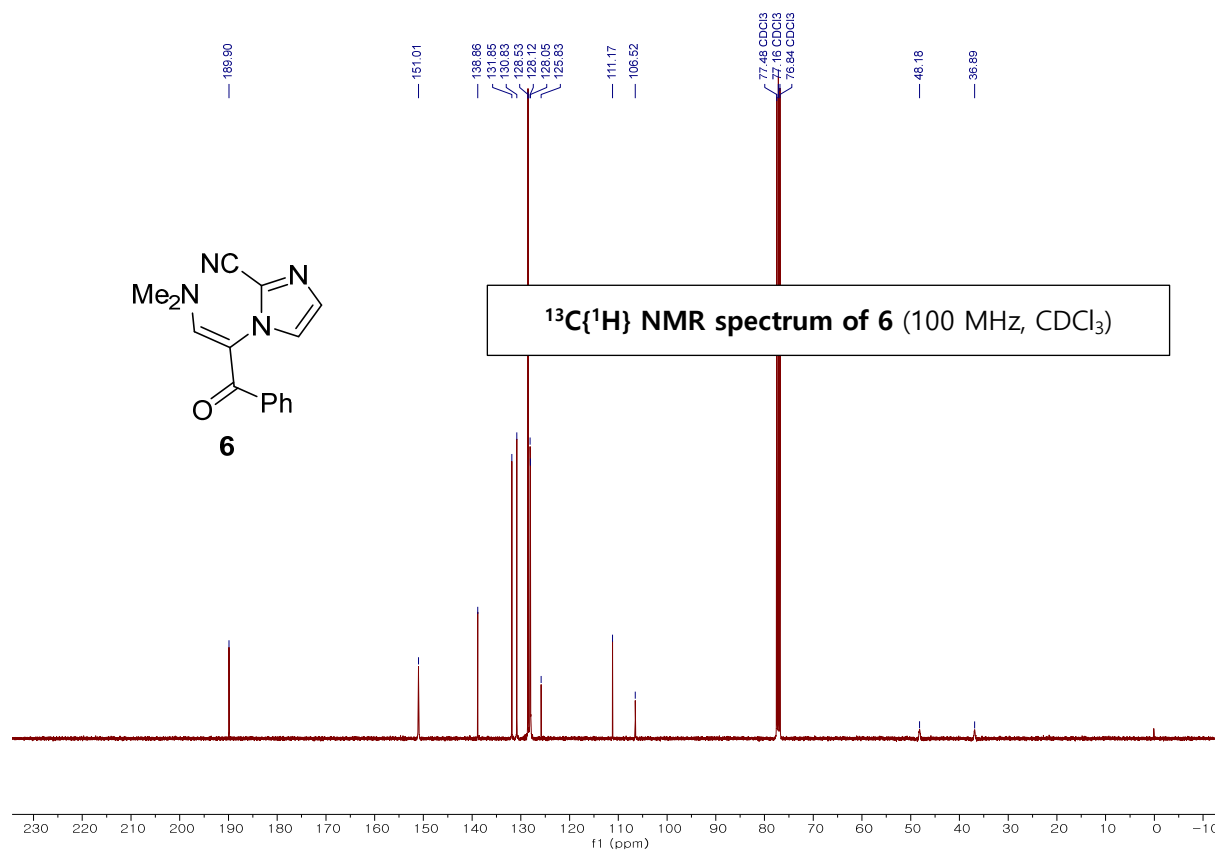

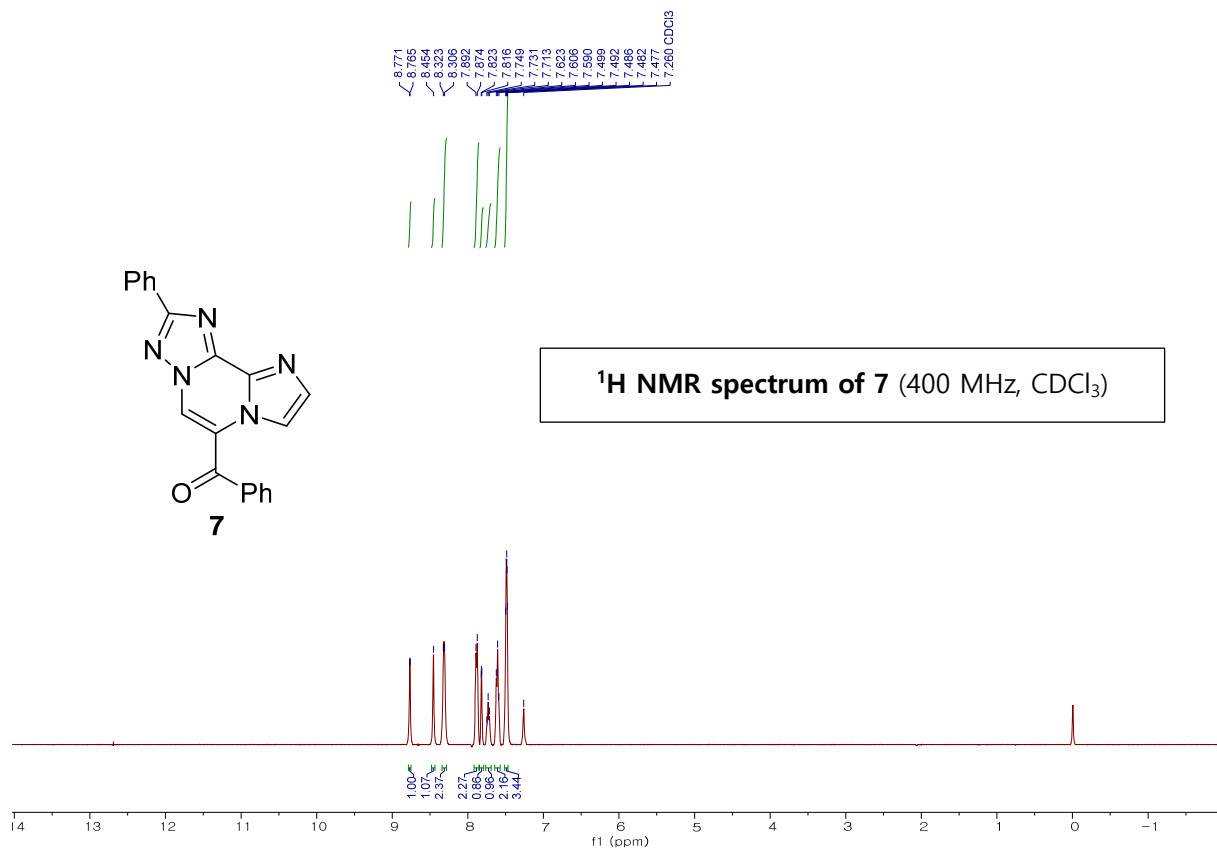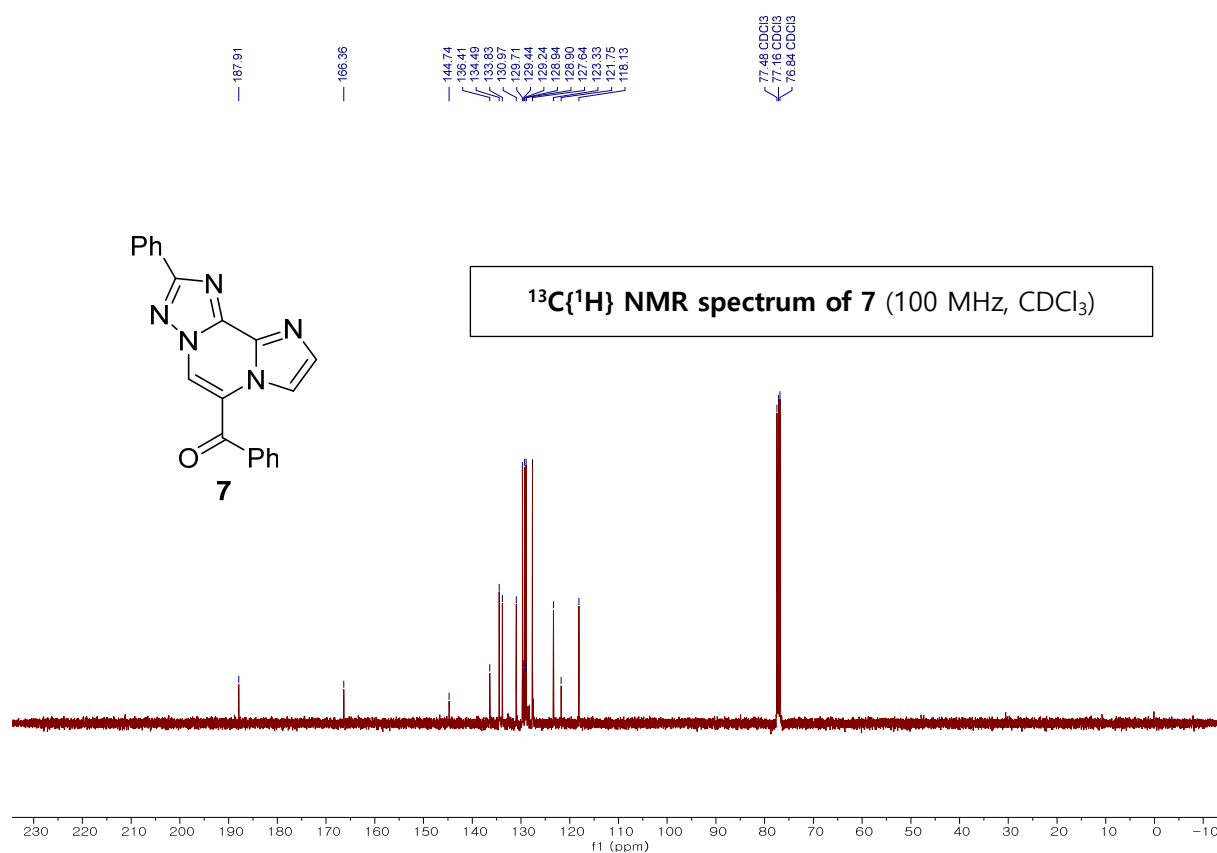

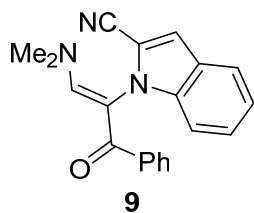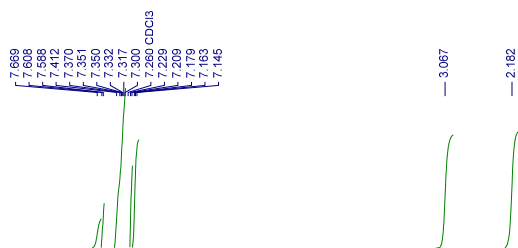

**<sup>1</sup>H NMR spectrum of 9 (400 MHz, CDCl<sub>3</sub>)**

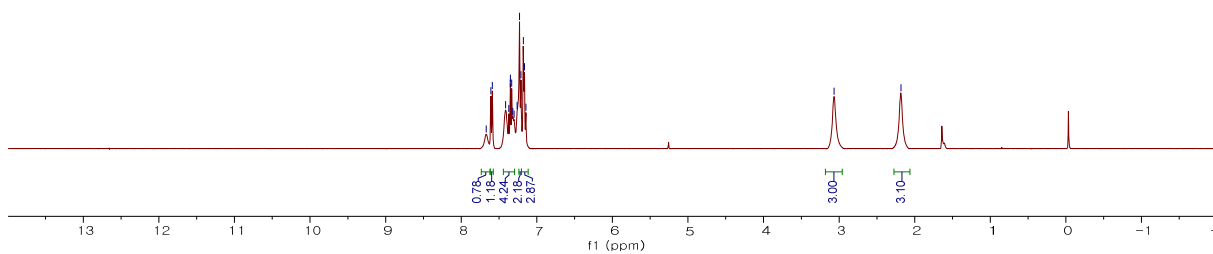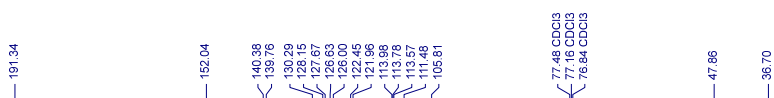

**<sup>13</sup>C{<sup>1</sup>H} NMR spectrum of 9 (100 MHz, CDCl<sub>3</sub>)**

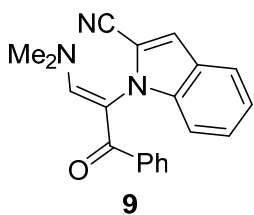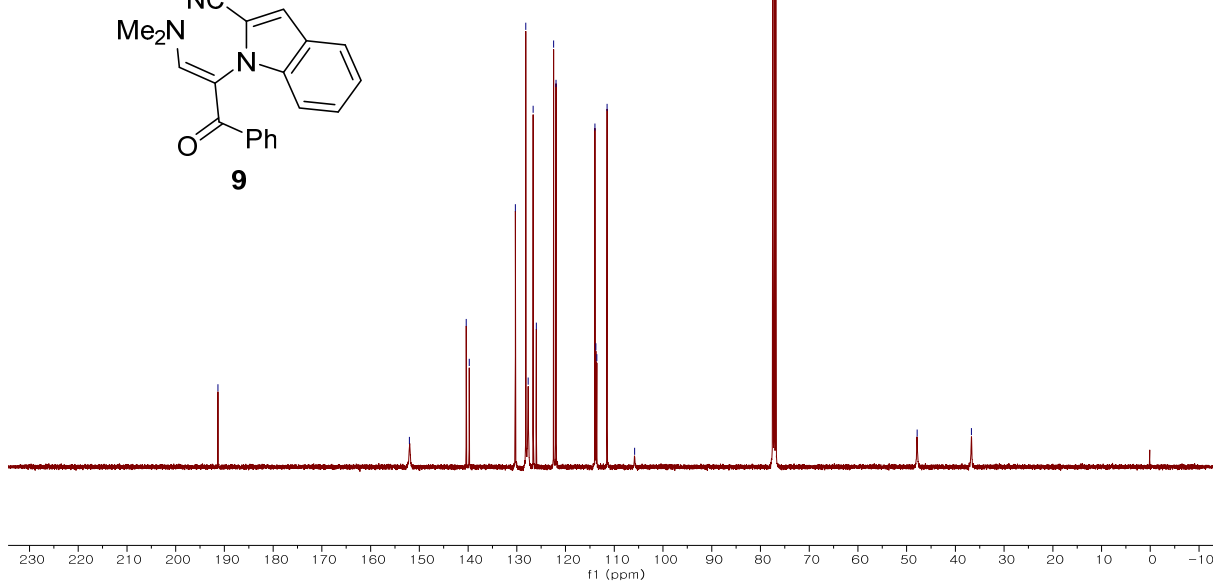



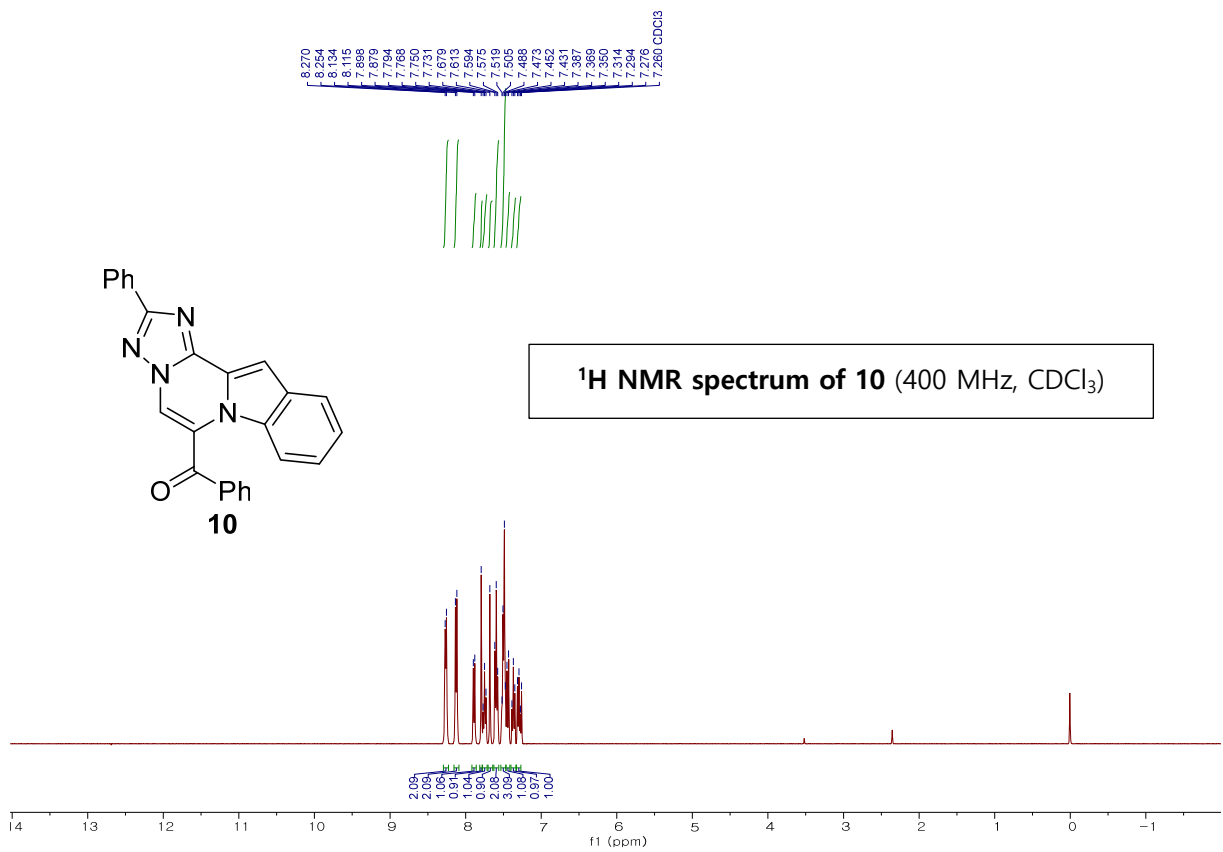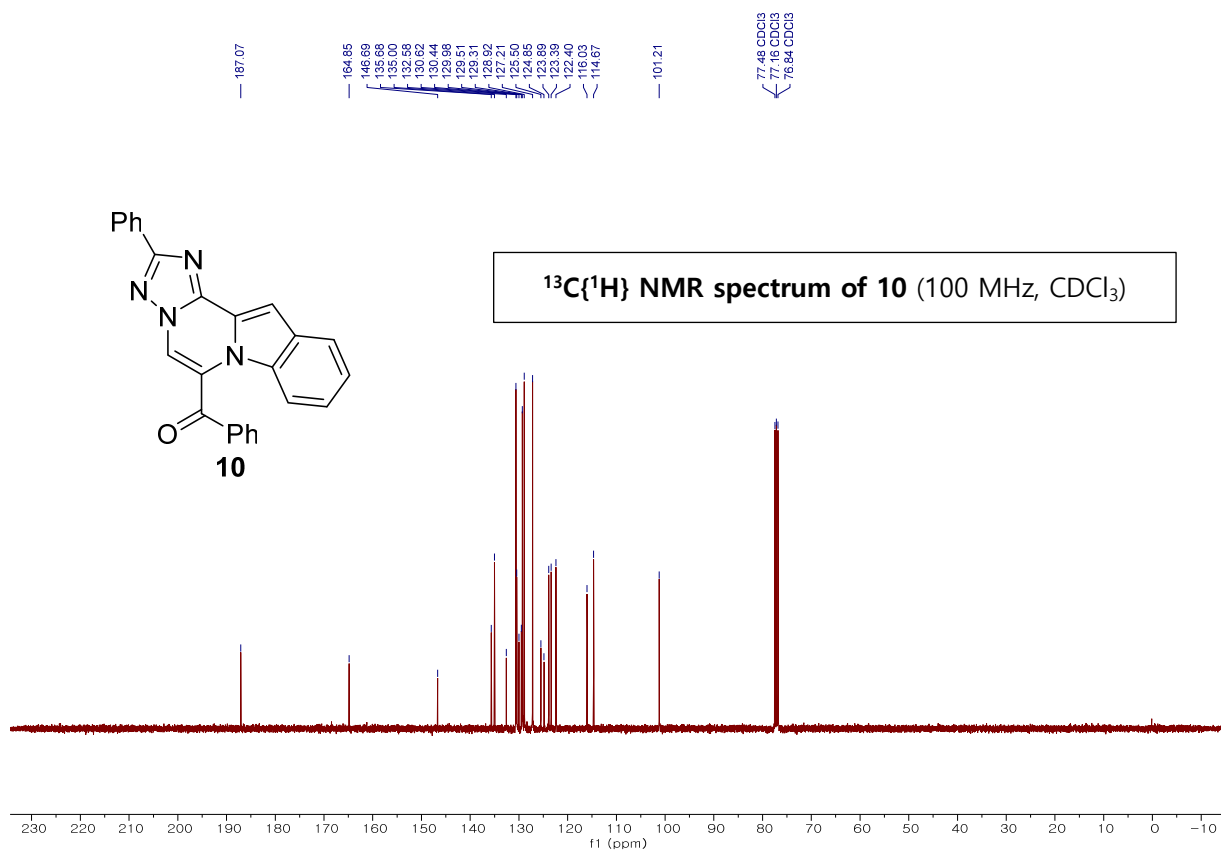

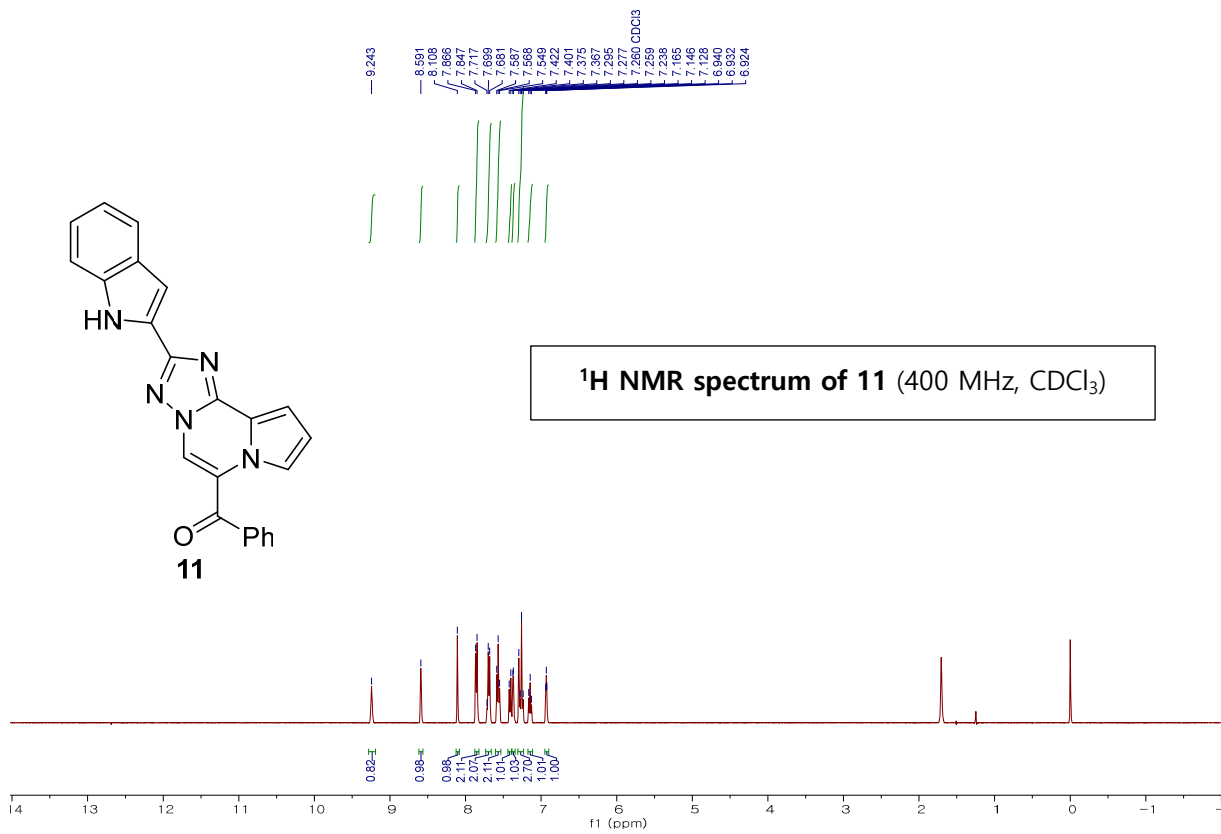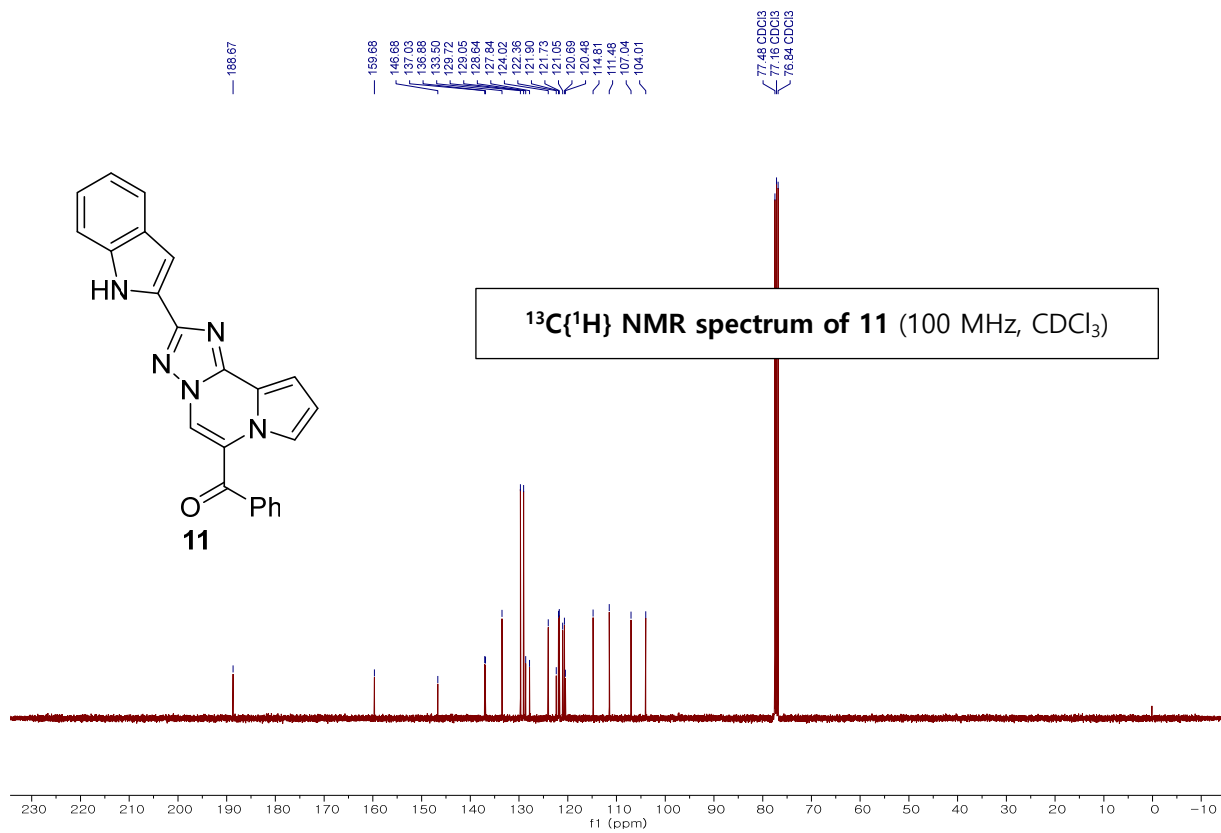

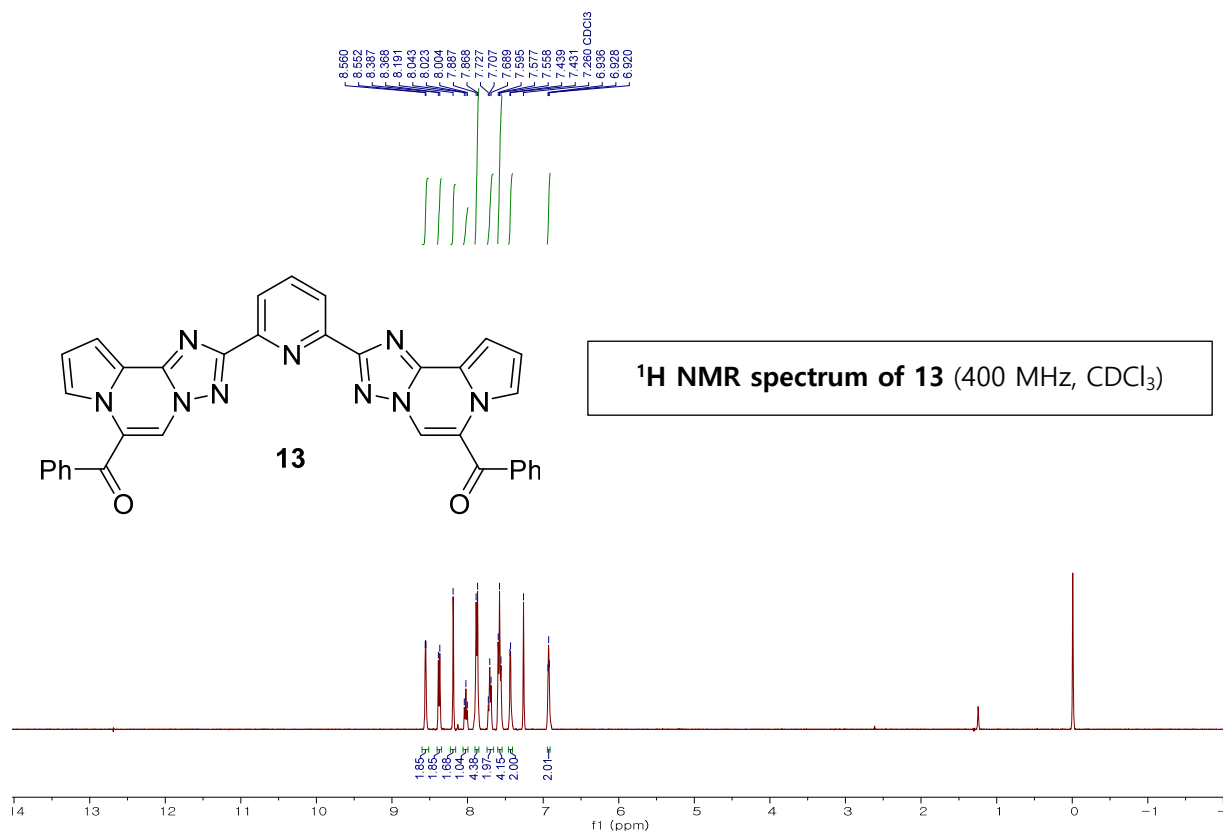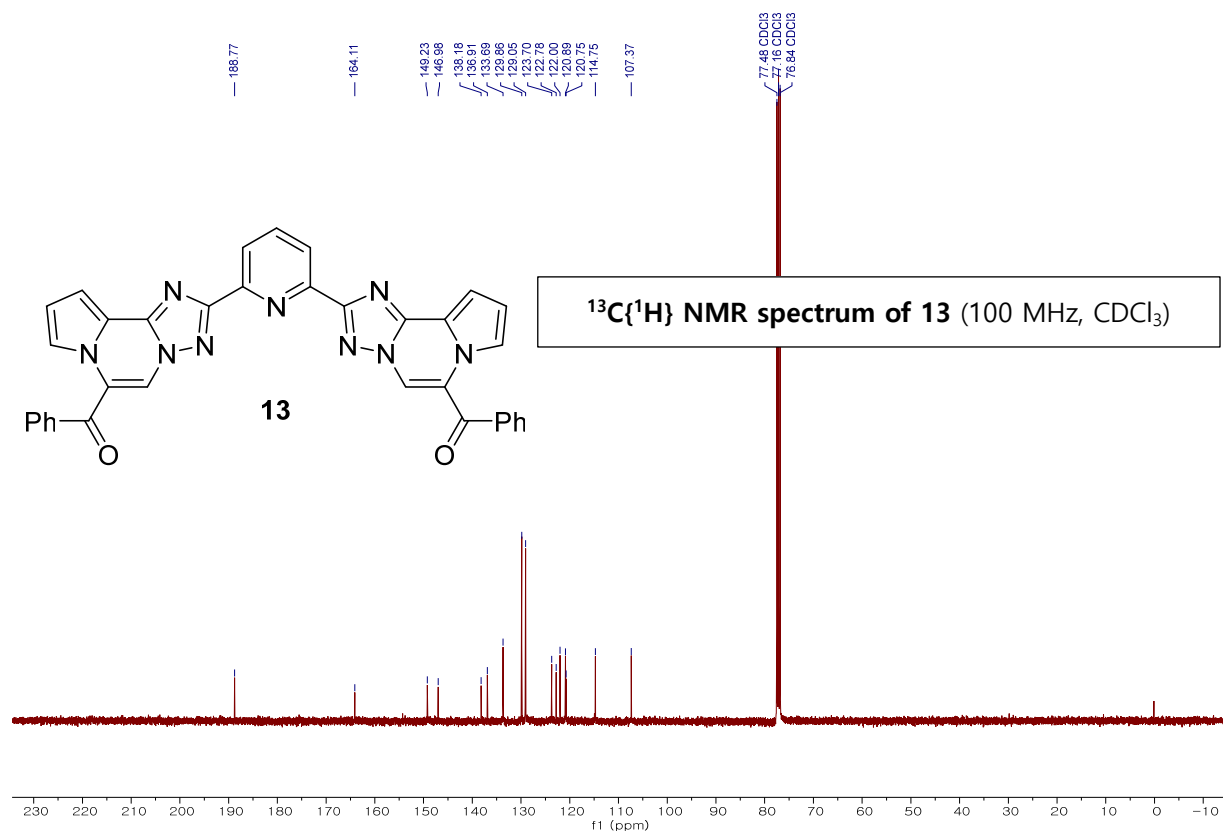

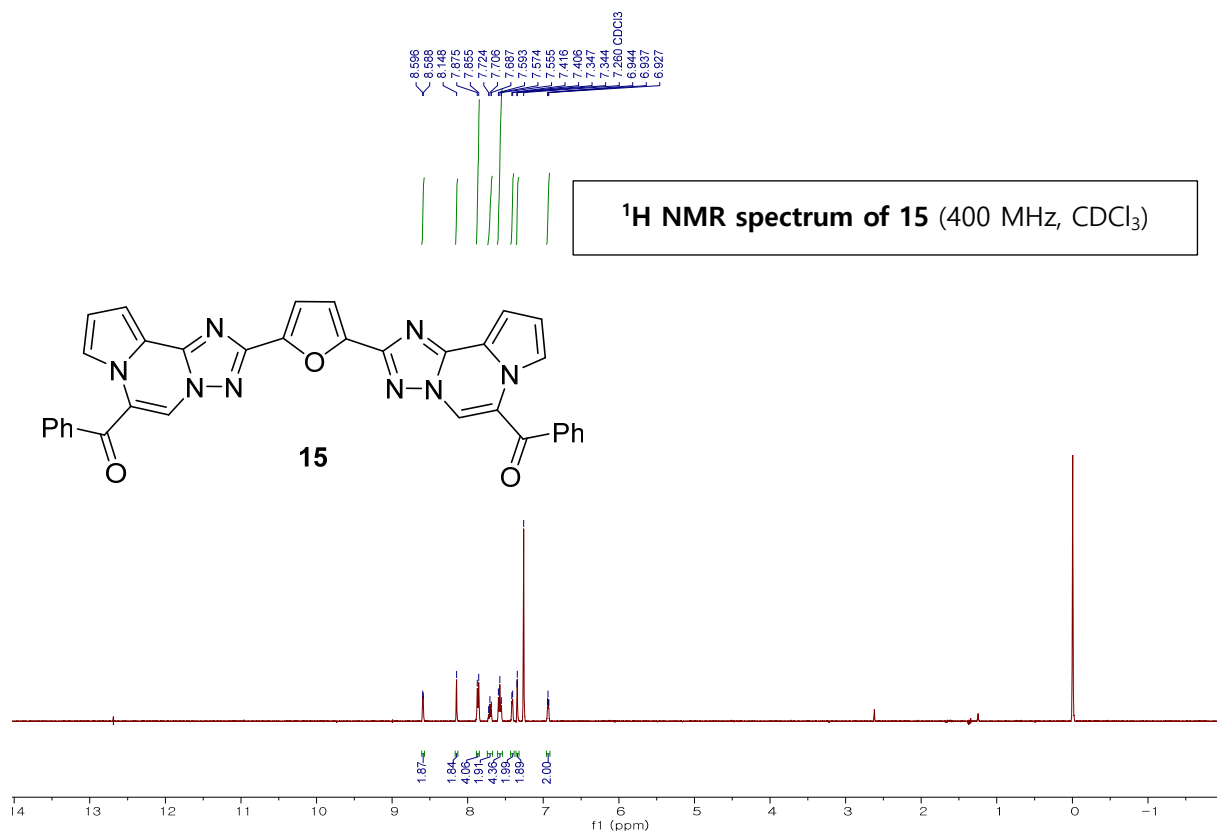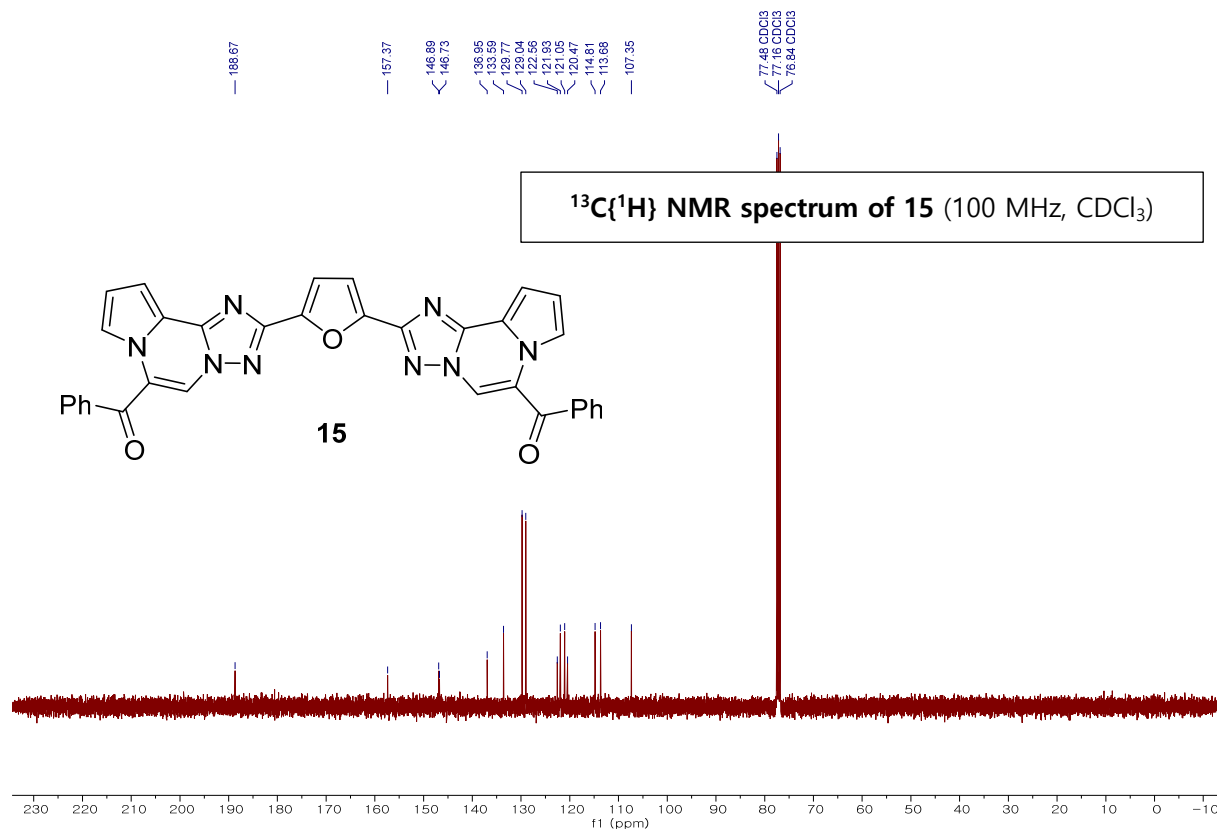

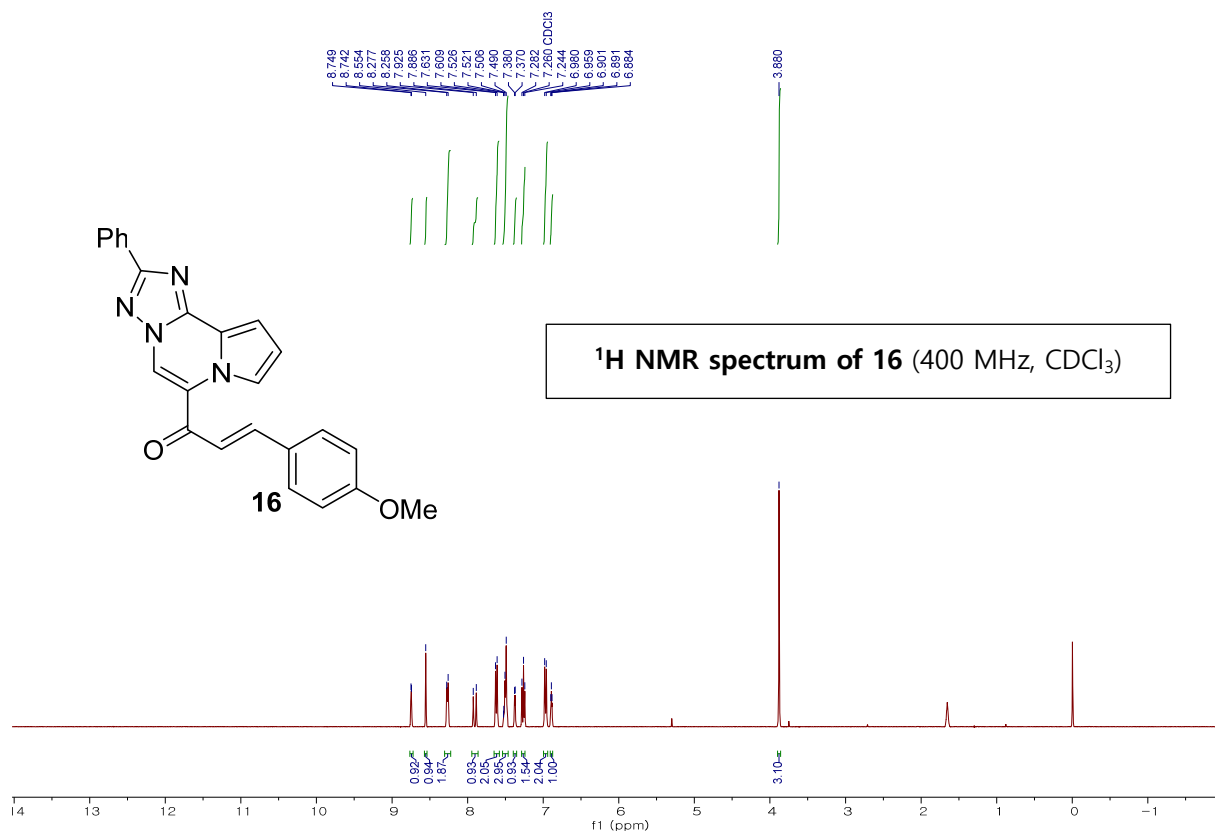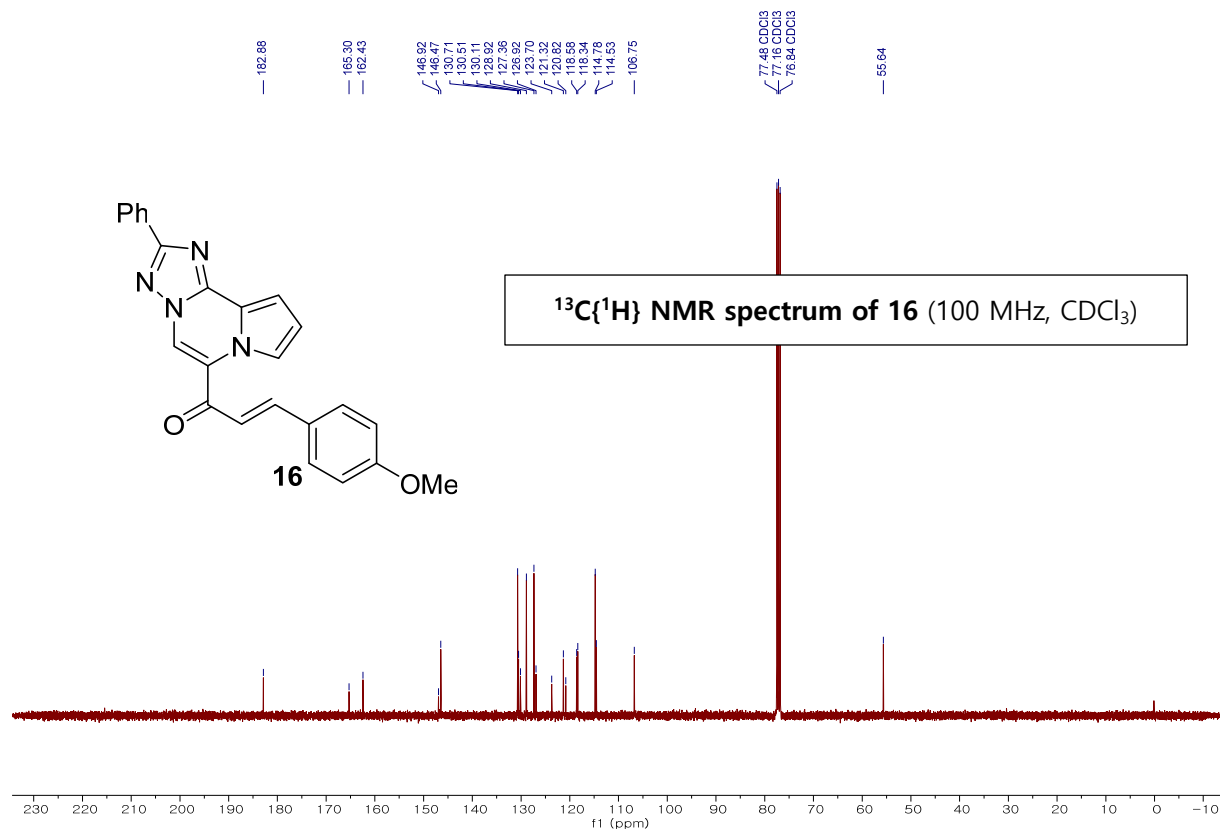

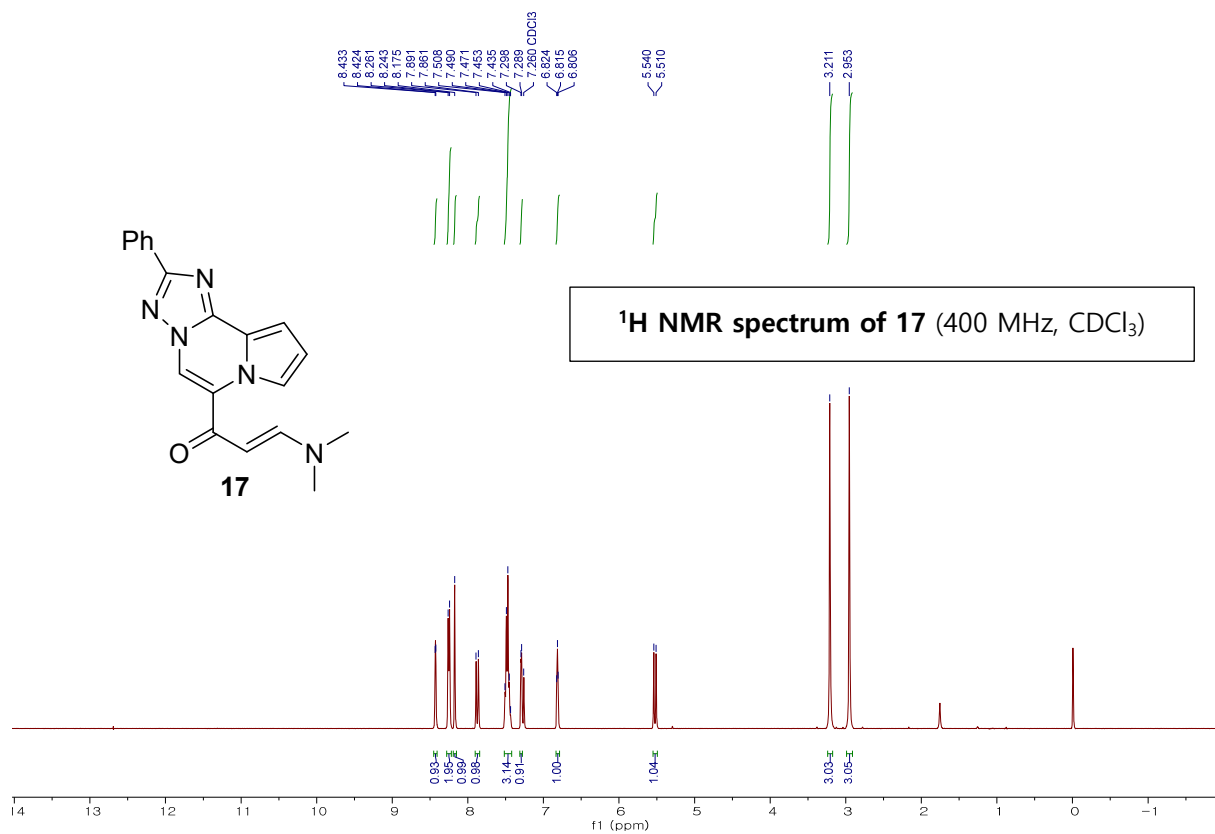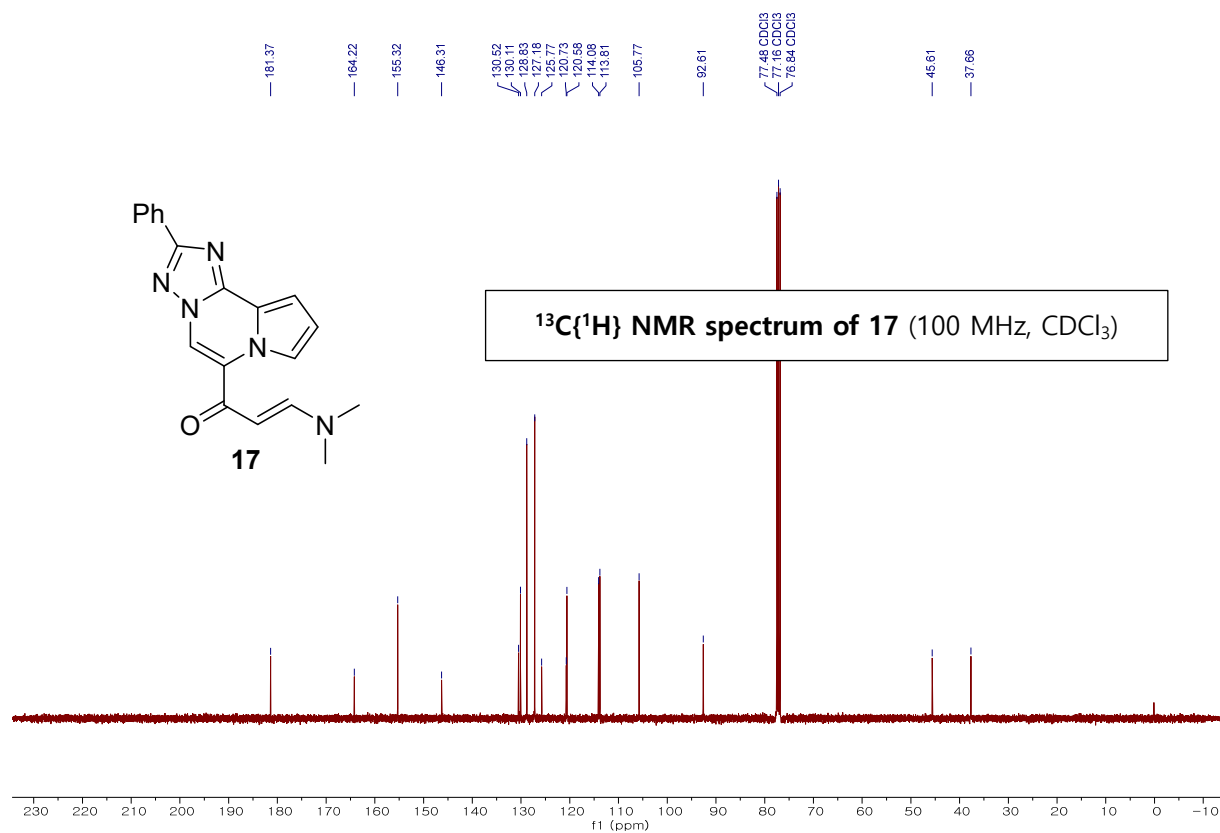

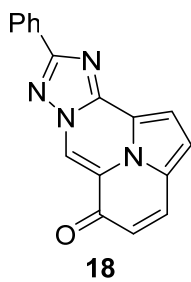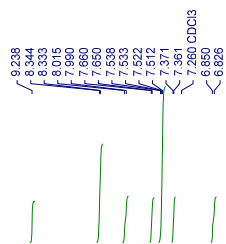

**<sup>1</sup>H NMR spectrum of 18 (400 MHz, CDCl<sub>3</sub>)**

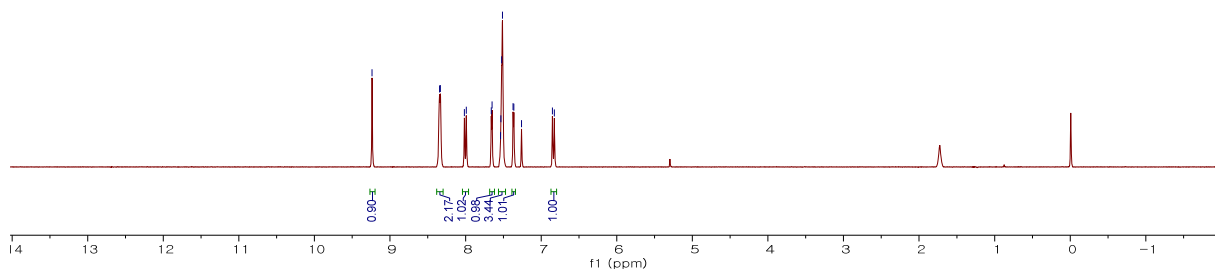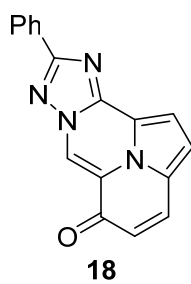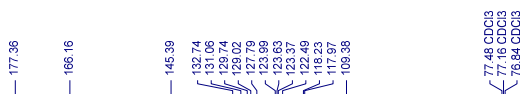

**<sup>13</sup>C{<sup>1</sup>H} NMR spectrum of 18 (100 MHz, CDCl<sub>3</sub>)**

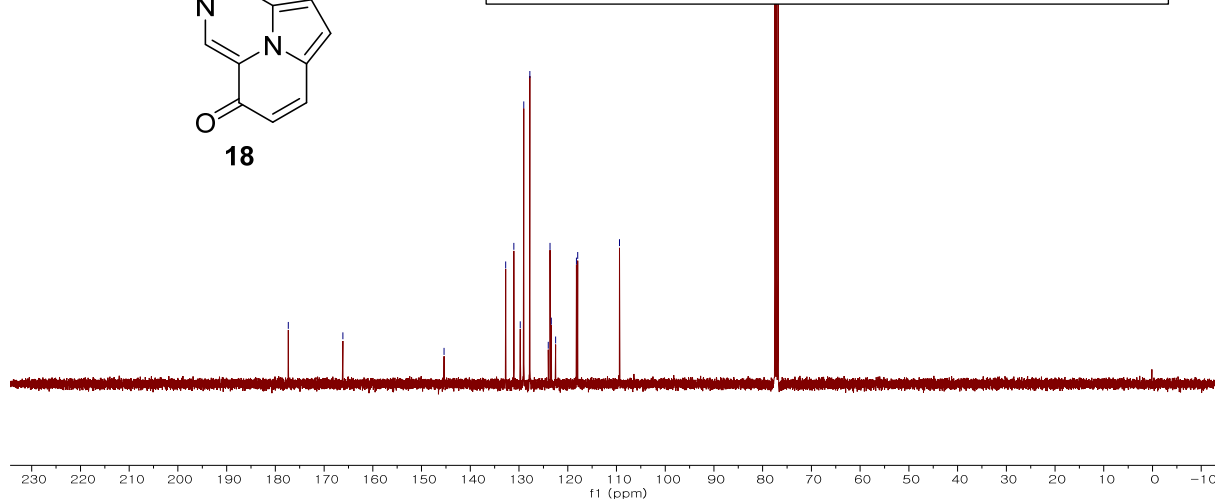

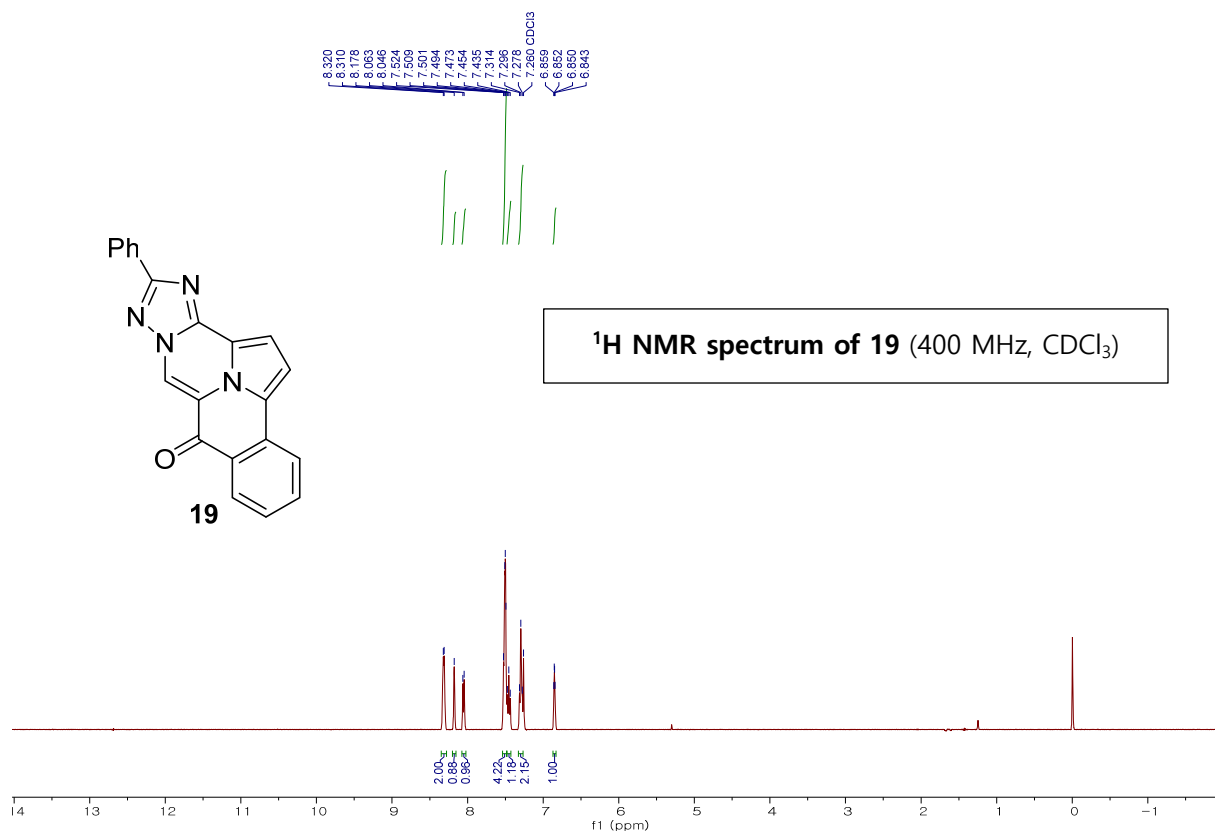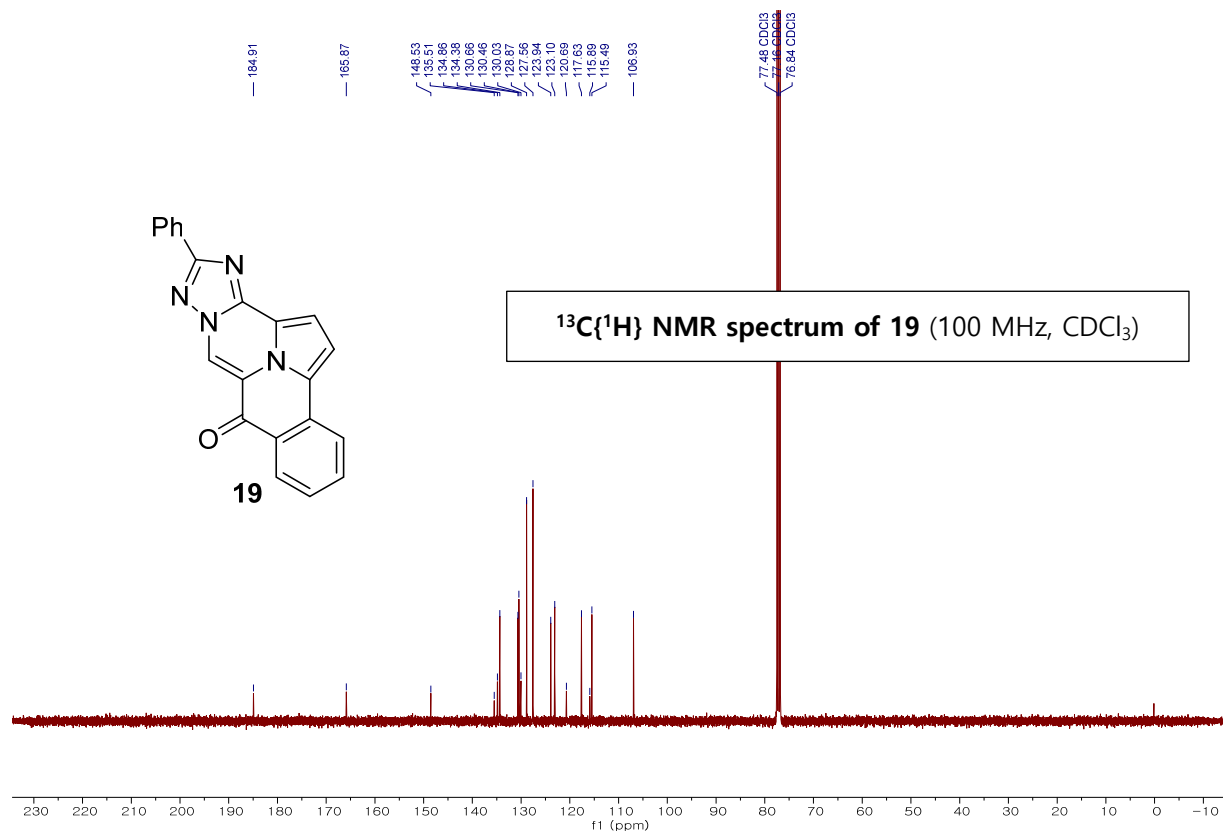



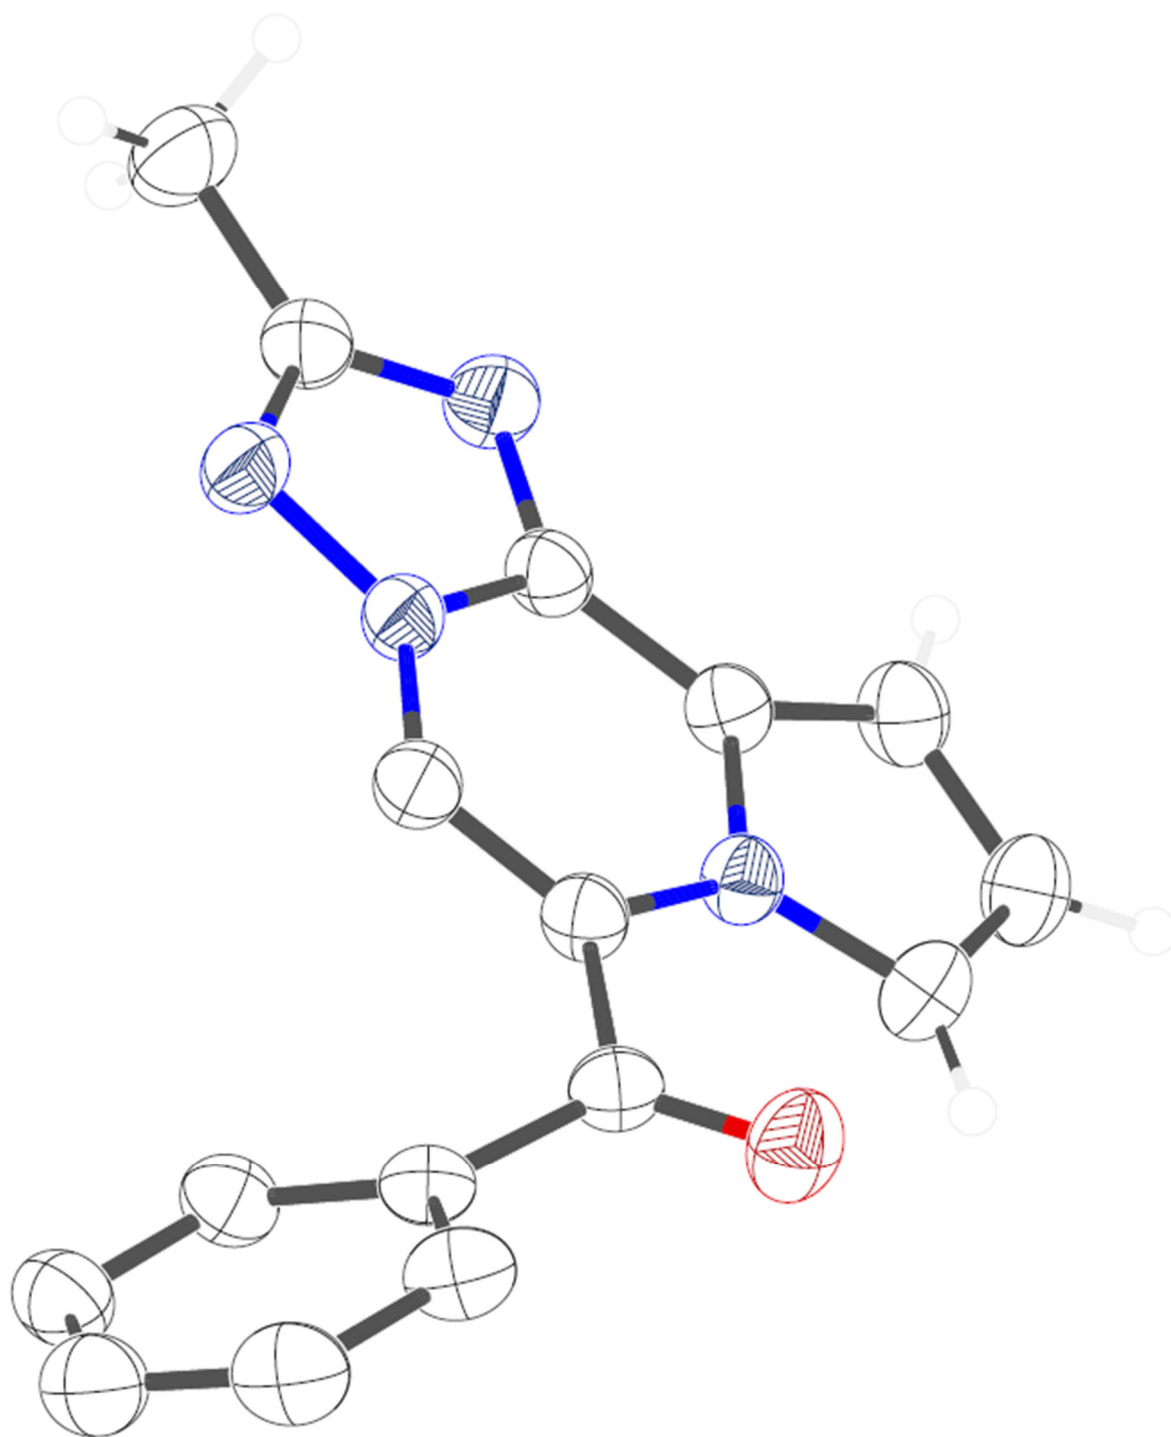

**Figure S1.** Thermal ellipsoid plot for **3q** with 50 % probability

The crystal **3q** for X-ray crystallographic analysis was obtained via dissolution of the compound in a mixed solvent (EtOAc:EtOH, 1:1) and slow evaporation of the solvent at room temperature.

---

**Table S1. Crystal data for 1,2,4-triazole-acylpyrrolopyrazine 3q.**

---

|                        |                                                  |         |
|------------------------|--------------------------------------------------|---------|
| Identification code    | 1,2,4-triazole-acylpyrrolopyrazine 3q            |         |
| Chemical formula       | C <sub>16</sub> H <sub>12</sub> N <sub>4</sub> O |         |
| Formula weight         | 276.30 g/mol                                     |         |
| Temperature/K          | 296(2) K                                         |         |
| Wavelength             | 0.71073 Å                                        |         |
| Crystal size           | 0.300 × 0.350 × 0.700 mm                         |         |
| Crystal habit          | Clear yellow block                               |         |
| Crystal system         | orthorhombic                                     |         |
| Space group            | Pbca                                             |         |
| Unit cell dimensions   | a = 17.3854(19) Å                                | α = 90° |
|                        | b = 7.5604(8) Å                                  | β = 90° |
|                        | c = 20.364(2) Å                                  | γ = 90° |
| Volume                 | 2676.7(5) Å <sup>3</sup>                         |         |
| Z                      | 8                                                |         |
| Density (calculated)   | 1.371 g/cm <sup>3</sup>                          |         |
| Absorption coefficient | 0.090 mm <sup>-1</sup>                           |         |
| F(000)                 | 1152                                             |         |

---
